# Supplementary material for: Bioinformatics analysis of the regulatory lncRNA-miRNA-mRNA network in patients with neuropathic pain and prediction of potential therapeutics
Source: Research Square preprint supplement (doi:10.21203/rs.3.rs-54799/v2), 2020-11-16
Supplement: Supplementary file 1 [file ea4bd2ebf45a31740f86ca43.xlsx]

## Sheet: Supplementary Table1
search_term	match_term	match_type	gene	drug	interaction_types	sources	pmids
DUSP1	DUSP1	Definite	DUSP1	VASOPRESSIN		NCI	9231829
DUSP1	DUSP1	Definite	DUSP1	HYDROXYUREA		NCI	15856297
DUSP1	DUSP1	Definite	DUSP1	ALBUTEROL		PharmGKB	20673984
HRH4	HRH4	Definite	HRH4	MIANSERIN	binder	DrugBank
HRH4	HRH4	Definite	HRH4	HISTAMINE	agonist	DTC|DrugBank|GuideToPharmacologyInteractions	20573261|20618322|20632959|19053770|20192225
HRH4	HRH4	Definite	HRH4	LOXAPINE	binder	DrugBank
HRH4	HRH4	Definite	HRH4	AMITRIPTYLINE	binder	DrugBank	19413571|11179435
HRH4	HRH4	Definite	HRH4	RISPERIDONE		PharmGKB	23422377
HRH4	HRH4	Definite	HRH4	ARIPIPRAZOLE	ligand	DrugBank	26346901
HRH4	HRH4	Definite	HRH4	PITOLISANT	antagonist	GuideToPharmacologyInteractions
HRH4	HRH4	Definite	HRH4	CLOZAPINE	antagonist	TdgClinicalTrial|DrugBank|TEND|GuideToPharmacologyInteractions	16854056|17346280|11752352|16860312
HRH4	HRH4	Definite	HRH4	CHLORPROMAZINE	binder	DrugBank	11179435
HRH4	HRH4	Definite	HRH4	AMOXAPINE	binder	DrugBank	15947036
HRH4	HRH4	Definite	HRH4	DOXEPIN	binder	DrugBank
HRH4	HRH4	Definite	HRH4	OLANZAPINE	antagonist		18308814
HRH4	HRH4	Definite	HRH4	PHENIRAMINE	inverse agonist	DrugBank	22918191
S1PR2	S1PR2	Definite	S1PR2	FINGOLIMOD HYDROCHLORIDE	agonist	ChemblInteractions
MDM4	MDM4	Definite	MDM4	DOCETAXEL		PharmGKB	24958282
MDM4	MDM4	Definite	MDM4	EPIRUBICIN		PharmGKB	24958282
PFN1	PFN1	Definite	PFN1	ARTENIMOL	ligand	DrugBank	26340163
ACTB	ACTB	Definite	ACTB	ETHINYL ESTRADIOL		NCI	17288598
ACTB	ACTB	Definite	ACTB	CYCLOPHOSPHAMIDE		NCI	12167460
IQGAP1	IQGAP1	Definite	IQGAP1	ARTENIMOL	ligand	DrugBank	26340163
STXBP2	STXBP2	Definite	STXBP2	EMAPALUMAB		PharmGKB|FDA
FOLR1	FOLR1	Definite	FOLR1	DEXAMETHASONE		NCI	15899836
FOLR1	FOLR1	Definite	FOLR1	PYRIMETHAMINE		TTD
FOLR1	FOLR1	Definite	FOLR1	METHOTREXATE		PharmGKB	21317831
FOLR1	FOLR1	Definite	FOLR1	FOLIC ACID		DTC|DrugBank	21879757|25234128
JUN	JUN	Definite	JUN	QUINAPRIL HYDROCHLORIDE		DTC
JUN	JUN	Definite	JUN	CLOTRIMAZOLE		DTC	16680159
JUN	JUN	Definite	JUN	IRBESARTAN		DrugBank	15133856|15210574
JUN	JUN	Definite	JUN	VINORELBINE TARTRATE		DTC
JUN	JUN	Definite	JUN	ATOMOXETINE HYDROCHLORIDE		DTC
JUN	JUN	Definite	JUN	CLOFIBRATE		DTC	16680159
JUN	JUN	Definite	JUN	FENOFIBRATE		DTC	16680159
JUN	JUN	Definite	JUN	TROPISETRON		DTC
JUN	JUN	Definite	JUN	GEMFIBROZIL		DTC	16680159
JUN	JUN	Definite	JUN	CIPROFIBRATE		DTC	16680159
JUN	JUN	Definite	JUN	CINNARIZINE		DTC	16680159
JUN	JUN	Definite	JUN	AZELASTINE HYDROCHLORIDE		DTC
JUN	JUN	Definite	JUN	ADAPALENE	antagonist	DrugBank	26947815|15727806
JUN	JUN	Definite	JUN	DIPHENHYDRAMINE HYDROCHLORIDE		DTC
JUN	JUN	Definite	JUN	VINBLASTINE SULFATE		DTC
JUN	JUN	Definite	JUN	METHIMAZOLE		DTC
JUN	JUN	Definite	JUN	MECHLORETHAMINE HYDROCHLORIDE		DTC
JUN	JUN	Definite	JUN	CUPRIC CHLORIDE		DTC
JUN	JUN	Definite	JUN	SERTRALINE		DTC	16680159
JUN	JUN	Definite	JUN	BUPROPION HYDROCHLORIDE		DTC
JUN	JUN	Definite	JUN	COLCHICINE		DTC
JUN	JUN	Definite	JUN	TRIFLUPROMAZINE HYDROCHLORIDE		DTC
JUN	JUN	Definite	JUN	VINBLASTINE		DrugBank	16555127|15498923|12907245|17126817|16111654
GGCX	GGCX	Definite	GGCX	PHYTONADIONE	inducer	TdgClinicalTrial|DrugBank|TEND|TTD	6380538|7638250|11752352|105006|16929463|8473318
GGCX	GGCX	Definite	GGCX	MENADIOL SODIUM DIPHOSPHATE	agonist	DrugBank
GGCX	GGCX	Definite	GGCX	MENADIONE	cofactor	TdgClinicalTrial|DrugBank|TEND	12083499|7657295|16102054
GGCX	GGCX	Definite	GGCX	ACENOCOUMAROL		PharmGKB	25042728|25519826|24927344|29432897
GGCX	GGCX	Definite	GGCX	ANISINDIONE	inhibitor	TdgClinicalTrial|DrugBank|TEND|GuideToPharmacologyInteractions	11752352|17139284|17016423
SLC7A5	SLC7A5	Definite	SLC7A5	MELPHALAN		PharmGKB
BCOR	BCOR	Definite	BCOR	RUXOLITINIB		JAX-CKB	30333627
BCOR	BCOR	Definite	BCOR	TRETINOIN		JAX-CKB	25790901
BCOR	BCOR	Definite	BCOR	TOFACITINIB		JAX-CKB	30333627
PEBP1	PEBP1	Definite	PEBP1	COPPER		DrugBank	15359738
PEBP1	PEBP1	Definite	PEBP1	FLUTAMIDE		NCI	12377983
GADD45A	GADD45A	Definite	GADD45A	CISPLATIN		NCI	9013707|10779360
GADD45A	GADD45A	Definite	GADD45A	DOXORUBICIN		NCI	7729953
KMT2D	KMT2D	Definite	KMT2D	BICALUTAMIDE
TPM3	TPM3	Definite	TPM3	METHOTREXATE		NCI	8509220
TPM3	TPM3	Definite	TPM3	EPINEPHRINE		NCI	18172836
TPM3	TPM3	Definite	TPM3	CORTICOTROPIN		NCI	17877367
TPM3	TPM3	Definite	TPM3	SIMVASTATIN		NCI	10720627
TPM3	TPM3	Definite	TPM3	PROGESTERONE		NCI	17549730
TPM3	TPM3	Definite	TPM3	MIDAZOLAM		NCI	16738805
TPM3	TPM3	Definite	TPM3	THIOGUANINE		NCI	7687657
SFN	SFN	Definite	SFN	IMATINIB		DTC	21962576
RPL14	RPL14	Definite	RPL14	ARTENIMOL	ligand	DrugBank	26340163
PSMD11	PSMD11	Definite	PSMD11	IXAZOMIB CITRATE	inhibitor	ChemblInteractions
PSMD11	PSMD11	Definite	PSMD11	CARFILZOMIB	inhibitor	DTC|MyCancerGenome|ChemblInteractions	24524217
PSMD11	PSMD11	Definite	PSMD11	BORTEZOMIB	inhibitor	DTC|MyCancerGenome|ChemblInteractions	24524217
CALU	CALU	Definite	CALU	ACENOCOUMAROL		PharmGKB	17596133|29479633
MAPK8	MAPK8	Definite	MAPK8	DEXRAZOXANE		NCI	10487526
MAPK8	MAPK8	Definite	MAPK8	PALBOCICLIB		DTC
MAPK8	MAPK8	Definite	MAPK8	BEXAROTENE		NCI	17027148
MAPK8	MAPK8	Definite	MAPK8	DOXYCYCLINE		NCI	16202406|15728539
MAPK8	MAPK8	Definite	MAPK8	BLEOMYCIN		NCI	16148050
MAPK8	MAPK8	Definite	MAPK8	TAMOXIFEN	modulator	DrugBank	27083550
MAPK8	MAPK8	Definite	MAPK8	GEFITINIB		NCI	17205515
MAPK8	MAPK8	Definite	MAPK8	SORAFENIB		PharmGKB	20124951
MAPK8	MAPK8	Definite	MAPK8	ENALAPRIL		NCI	16772709
MAPK8	MAPK8	Definite	MAPK8	PRAZOSIN		NCI	12095132
MAPK8	MAPK8	Definite	MAPK8	OXYTOCIN		NCI	11566737
MAPK8	MAPK8	Definite	MAPK8	PAZOPANIB		DTC
CHD1	CHD1	Definite	CHD1	EPIRUBICIN	antagonist	TdgClinicalTrial|TEND	17139284|17016423
FST	FST	Definite	FST	INDOMETHACIN		NCI	15941869
FST	FST	Definite	FST	BICALUTAMIDE		NCI	14761877
CISH	CISH	Definite	CISH	EPOETIN ALFA		NCI	12396724
CAPN10	CAPN10	Definite	CAPN10	METFORMIN		PharmGKB	25327507
CAPN10	CAPN10	Definite	CAPN10	TACROLIMUS		PharmGKB	19752882
BACH1	BACH1	Definite	BACH1	ISONIAZID		PharmGKB	22341855|29036176
MAPK13	MAPK13	Definite	MAPK13	FOSTAMATINIB	inhibitor	DrugBank	26516587
MAPK13	MAPK13	Definite	MAPK13	PIRFENIDONE		TdgClinicalTrial
MAPK13	MAPK13	Definite	MAPK13	SORAFENIB		PharmGKB	20124951
ARID1A	ARID1A	Definite	ARID1A	FLUOROURACIL		JAX-CKB	28860825
ARID1A	ARID1A	Definite	ARID1A	TALAZOPARIB		JAX-CKB	26069190|29669295
ARID1A	ARID1A	Definite	ARID1A	ATEZOLIZUMAB		JAX-CKB	32554706
ARID1A	ARID1A	Definite	ARID1A	RUCAPARIB		JAX-CKB	26069190
ARID1A	ARID1A	Definite	ARID1A	BEVACIZUMAB		JAX-CKB	27601542
ARID1A	ARID1A	Definite	ARID1A	NIVOLUMAB		JAX-CKB	32554706
ARID1A	ARID1A	Definite	ARID1A	TRASTUZUMAB		CGI|JAX-CKB	27172896
ARID1A	ARID1A	Definite	ARID1A	EVEROLIMUS		JAX-CKB	27601542
ARID1A	ARID1A	Definite	ARID1A	OLAPARIB		JAX-CKB	31806540|26069190
ARID1A	ARID1A	Definite	ARID1A	CISPLATIN		JAX-CKB	28860825
ARID1A	ARID1A	Definite	ARID1A	DASATINIB		JAX-CKB	27364904
RPS6KA3	RPS6KA3	Definite	RPS6KA3	UREA		NCI	9458825
RPS6KA3	RPS6KA3	Definite	RPS6KA3	PALBOCICLIB		DTC
RPS6KA3	RPS6KA3	Definite	RPS6KA3	FOSTAMATINIB	inhibitor	DrugBank	26516587
CDK16	CDK16	Definite	CDK16	FOSTAMATINIB	inhibitor	DrugBank	26516587
ADM	ADM	Definite	ADM	INSULIN		NCI	12668590
ADM	ADM	Definite	ADM	ALTEPLASE		NCI	10848972
ADM	ADM	Definite	ADM	PAROXETINE		PharmGKB	19636336
ADM	ADM	Definite	ADM	INDOMETHACIN		NCI	10830296
HTT	HTT	Definite	HTT	AMITRIPTYLINE HYDROCHLORIDE	inhibitor	ChemblInteractions
HTT	HTT	Definite	HTT	ACRIFLAVINE		DTC
HTT	HTT	Definite	HTT	CLOMIPRAMINE HYDROCHLORIDE	inhibitor	ChemblInteractions
HTT	HTT	Definite	HTT	MITOXANTRONE		DTC
HTT	HTT	Definite	HTT	FLUVOXAMINE MALEATE	inhibitor	ChemblInteractions
HTT	HTT	Definite	HTT	ESCITALOPRAM OXALATE	inhibitor	ChemblInteractions
HTT	HTT	Definite	HTT	AMOXAPINE	inhibitor	ChemblInteractions
HTT	HTT	Definite	HTT	TRICLOCARBAN		DTC
HTT	HTT	Definite	HTT	METHYLPHENIDATE		PharmGKB	29382897
HTT	HTT	Definite	HTT	VANDETANIB		DTC
HTT	HTT	Definite	HTT	COPPER		DrugBank	17396163
HTT	HTT	Definite	HTT	DESVENLAFAXINE	inhibitor	ChemblInteractions
HTT	HTT	Definite	HTT	OXYBENZONE		DTC
HTT	HTT	Definite	HTT	PAROXETINE HYDROCHLORIDE	inhibitor	ChemblInteractions
HTT	HTT	Definite	HTT	DESVENLAFAXINE SUCCINATE	inhibitor	ChemblInteractions
HTT	HTT	Definite	HTT	KETOROLAC TROMETHAMINE		DTC
HTT	HTT	Definite	HTT	RISPERIDONE		PharmGKB
HTT	HTT	Definite	HTT	CETRIMIDE		DTC
HTT	HTT	Definite	HTT	IDARUBICIN		DTC
HTT	HTT	Definite	HTT	MECHLORETHAMINE HYDROCHLORIDE		DTC
HTT	HTT	Definite	HTT	LEFLUNOMIDE		DTC
HTT	HTT	Definite	HTT	DULOXETINE HYDROCHLORIDE	inhibitor	ChemblInteractions
HTT	HTT	Definite	HTT	PROTRIPTYLINE HYDROCHLORIDE	inhibitor	ChemblInteractions
HTT	HTT	Definite	HTT	FLUOXETINE HYDROCHLORIDE	inhibitor	ChemblInteractions
HTT	HTT	Definite	HTT	VORTIOXETINE HYDROBROMIDE	inhibitor	ChemblInteractions
HTT	HTT	Definite	HTT	THIMEROSAL		DTC
HTT	HTT	Definite	HTT	NORTRIPTYLINE HYDROCHLORIDE	inhibitor	ChemblInteractions
HTT	HTT	Definite	HTT	IMIPRAMINE HYDROCHLORIDE	inhibitor	ChemblInteractions
HTT	HTT	Definite	HTT	VILAZODONE HYDROCHLORIDE	inhibitor	ChemblInteractions
HTT	HTT	Definite	HTT	PROFLAVINE		DTC
HTT	HTT	Definite	HTT	VENLAFAXINE HYDROCHLORIDE	inhibitor	ChemblInteractions
HTT	HTT	Definite	HTT	TRYPAN BLUE		DTC
HTT	HTT	Definite	HTT	AZACITIDINE		DTC
HTT	HTT	Definite	HTT	FLUSPIRILENE		DTC
HTT	HTT	Definite	HTT	PROMETHAZINE		DTC
HTT	HTT	Definite	HTT	MAZINDOL	inhibitor	ChemblInteractions
HTT	HTT	Definite	HTT	FLUORESCEIN		DTC
HTT	HTT	Definite	HTT	TRAZODONE HYDROCHLORIDE	inhibitor	ChemblInteractions
HTT	HTT	Definite	HTT	SERTRALINE HYDROCHLORIDE	inhibitor	ChemblInteractions
HTT	HTT	Definite	HTT	NEFAZODONE HYDROCHLORIDE	inhibitor	ChemblInteractions
HTT	HTT	Definite	HTT	HEXACHLOROPHENE		DTC
HTT	HTT	Definite	HTT	DACTINOMYCIN		DTC
HTT	HTT	Definite	HTT	PAROXETINE MESYLATE	inhibitor	ChemblInteractions
HTT	HTT	Definite	HTT	CITALOPRAM HYDROBROMIDE	inhibitor	ChemblInteractions
HTT	HTT	Definite	HTT	TERAZOSIN		DTC
HTT	HTT	Definite	HTT	LEVOMILNACIPRAN HYDROCHLORIDE	inhibitor	ChemblInteractions
HTT	HTT	Definite	HTT	CHLOROXINE		DTC
HTT	HTT	Definite	HTT	DAUNORUBICIN		DTC
RAF1	RAF1	Definite	RAF1	DABRAFENIB	antagonist|inhibitor	DrugBank
RAF1	RAF1	Definite	RAF1	SORAFENIB TOSYLATE	inhibitor	ChemblInteractions
RAF1	RAF1	Definite	RAF1	PACLITAXEL		PharmGKB	21636554
RAF1	RAF1	Definite	RAF1	ENCORAFENIB	inhibitor	MyCancerGenome
RAF1	RAF1	Definite	RAF1	GEMCITABINE		PharmGKB	21636554
RAF1	RAF1	Definite	RAF1	FOSTAMATINIB	inhibitor	DrugBank	26516587
RAF1	RAF1	Definite	RAF1	CISPLATIN		PharmGKB	21636554
RAF1	RAF1	Definite	RAF1	COBIMETINIB		OncoKB
RAF1	RAF1	Definite	RAF1	SORAFENIB	inhibitor	MyCancerGenome|TdgClinicalTrial|DrugBank|TEND|CGI|MyCancerGenomeClinicalTrial|PharmGKB|GuideToPharmacologyInteractions	16890795|17266941|17296815|20812347|16757355|18794803|20124951|28362716|17272980|18852116
RAF1	RAF1	Definite	RAF1	DOCETAXEL		PharmGKB	21636554
RAF1	RAF1	Definite	RAF1	VEMURAFENIB	inhibitor	GuideToPharmacologyInteractions
RAF1	RAF1	Definite	RAF1	CARBOPLATIN		PharmGKB	21636554
RAF1	RAF1	Definite	RAF1	SINCALIDE	agonist	DrugBank
RAF1	RAF1	Definite	RAF1	REGORAFENIB	inhibitor	MyCancerGenome|DrugBank|ChemblInteractions|MyCancerGenomeClinicalTrial
TSHZ2	TSHZ2	Definite	TSHZ2	ALLOPURINOL		PharmGKB	29193002
PPP1CA	PPP1CA	Definite	PPP1CA	CANTHARIDIN		TTD
ICMT	ICMT	Definite	ICMT	SIMVASTATIN		DTC
UGCG	UGCG	Definite	UGCG	MIGLUSTAT	inhibitor	TdgClinicalTrial|DrugBank|ChemblInteractions|TEND|TTD|GuideToPharmacologyInteractions	17624027|14609352|12803929|18221193|17603755|11752352|19956552|16247743|16627252|18728838
UGCG	UGCG	Definite	UGCG	ELIGLUSTAT	antagonist	TdgClinicalTrial|DrugBank	25239269
UGCG	UGCG	Definite	UGCG	ELIGLUSTAT TARTRATE			17509920
SHMT1	SHMT1	Definite	SHMT1	FLUOROURACIL		PharmGKB	22044939
SHMT1	SHMT1	Definite	SHMT1	LEUCOVORIN		PharmGKB	22044939
SHMT1	SHMT1	Definite	SHMT1	BEVACIZUMAB		PharmGKB	22044939
SHMT1	SHMT1	Definite	SHMT1	GLYCINE	product of	DrugBank	17355947|17150100|16876889|17664250|17142057
SHMT1	SHMT1	Definite	SHMT1	METHOTREXATE		PharmGKB	20386493|18322994|15797993|22838948|18368069
SHMT1	SHMT1	Definite	SHMT1	IRINOTECAN		PharmGKB	22044939
TGFB1	TGFB1	Definite	TGFB1	MELATONIN		NCI	9649124
TGFB1	TGFB1	Definite	TGFB1	ASPIRIN		PharmGKB	19138248
TGFB1	TGFB1	Definite	TGFB1	RAMIPRIL		NCI	15716710
TGFB1	TGFB1	Definite	TGFB1	DOXORUBICIN		NCI	12956904
TGFB1	TGFB1	Definite	TGFB1	CLADRIBINE		NCI	12097998
TGFB1	TGFB1	Definite	TGFB1	ATENOLOL		NCI	15049387
TGFB1	TGFB1	Definite	TGFB1	VERAPAMIL		NCI
TGFB1	TGFB1	Definite	TGFB1	HYALURONIDASE	inhibitor	DrugBank	9435505|11327694|7648625|9850732
TGFB1	TGFB1	Definite	TGFB1	TOREMIFENE		NCI	12476040
TGFB1	TGFB1	Definite	TGFB1	PIOGLITAZONE		NCI	17407709
TGFB1	TGFB1	Definite	TGFB1	HYDROCORTISONE		NCI	7895901
TGFB1	TGFB1	Definite	TGFB1	RITUXIMAB		PharmGKB	22129793
TGFB1	TGFB1	Definite	TGFB1	STREPTOZOCIN		NCI	17968528
TGFB1	TGFB1	Definite	TGFB1	TRIAMCINOLONE		NCI	12174062
TGFB1	TGFB1	Definite	TGFB1	NICOTINE		NCI	10198208
TGFB1	TGFB1	Definite	TGFB1	ETOPOSIDE		NCI	16002781
TGFB1	TGFB1	Definite	TGFB1	TERAZOSIN	inducer	DrugBank	23518907|11170131
TGFB1	TGFB1	Definite	TGFB1	AMIFOSTINE		NCI	12005544
TGFB1	TGFB1	Definite	TGFB1	IRINOTECAN		PharmGKB	27160286
TGFB1	TGFB1	Definite	TGFB1	TAMOXIFEN		NCI	8019941
TGFB1	TGFB1	Definite	TGFB1	PIRFENIDONE		NCI|TTD	12907346
TGFB1	TGFB1	Definite	TGFB1	TESTOSTERONE		NCI	9288184
RARA	RARA	Definite	RARA	DIMETHYL SULFOXIDE		NCI	9067579
RARA	RARA	Definite	RARA	ISOTRETINOIN	agonist	TdgClinicalTrial|DrugBank|ChemblInteractions|TEND	10955779|9691099|7601910|9204085|16983322
RARA	RARA	Definite	RARA	COLCHICINE		NCI	9667638|17291686
RARA	RARA	Definite	RARA	CETUXIMAB		NCI	8857944
RARA	RARA	Definite	RARA	NALOXONE		NCI	14741437
RARA	RARA	Definite	RARA	TAZAROTENE	agonist	TdgClinicalTrial|DrugBank|ChemblInteractions|TEND|GuideToPharmacologyInteractions	16144296|15383624|10828316|14675762|9035701|11519864
RARA	RARA	Definite	RARA	ACITRETIN	agonist	TdgClinicalTrial|DrugBank|ChemblInteractions|TEND	9074840|10459139|19144697|9153406
RARA	RARA	Definite	RARA	DEXAMETHASONE		NCI	8606853
RARA	RARA	Definite	RARA	MELATONIN		NCI	15813899
RARA	RARA	Definite	RARA	ALITRETINOIN	agonist	DTC|DrugBank|ChemblInteractions|TEND|GuideToPharmacologyInteractions	16144296|16424870|18321241|16420438|11752352|16339527|7807131|16253547
RARA	RARA	Definite	RARA	RETINOL		DTC	18511283
RARA	RARA	Definite	RARA	TRETINOIN	agonist	DTC|DrugBank|ChemblInteractions|PharmGKB|FDA|GuideToPharmacologyInteractions	25838141|18511283|1318502
RARA	RARA	Definite	RARA	ADAPALENE	agonist	TdgClinicalTrial|DrugBank|ChemblInteractions|TEND|GuideToPharmacologyInteractions	9557255|19929446|31273085|9204085|9990415|10651997|9990413
RARA	RARA	Definite	RARA	INSULIN		NCI	9329777
NF2	NF2	Definite	NF2	ERLOTINIB		CGI
NF2	NF2	Definite	NF2	CARBOPLATIN			25798586
NF2	NF2	Definite	NF2	TEMSIROLIMUS			25878190
NF2	NF2	Definite	NF2	BEVACIZUMAB		CGI	26022982|19587327|22805104
NF2	NF2	Definite	NF2	CISPLATIN			25798586
NF2	NF2	Definite	NF2	OCTREOTIDE		CGI
NF2	NF2	Definite	NF2	EVEROLIMUS		CGI	25567352|24311643|2556735
NF2	NF2	Definite	NF2	IMATINIB		CGI	19509233|2290085
NF2	NF2	Definite	NF2	CETUXIMAB		CGI
NF2	NF2	Definite	NF2	LAPATINIB		CGI	973739|22844108
SLC2A1	SLC2A1	Definite	SLC2A1	TRIAMCINOLONE		NCI	10199793
SLC2A1	SLC2A1	Definite	SLC2A1	GENTAMICIN		NCI	8779884
SLC2A1	SLC2A1	Definite	SLC2A1	PIOGLITAZONE		NCI	17251278
SLC2A1	SLC2A1	Definite	SLC2A1	PHENYTOIN		NCI	15698863
SLC2A1	SLC2A1	Definite	SLC2A1	DIAZEPAM		NCI	15148255
SLC2A1	SLC2A1	Definite	SLC2A1	THIOCTIC ACID		DTC	23984871
SLC2A1	SLC2A1	Definite	SLC2A1	PROGESTERONE		NCI	15350188
FLT1	FLT1	Definite	FLT1	ERLOTINIB		DTC
FLT1	FLT1	Definite	FLT1	PAZOPANIB HYDROCHLORIDE	inhibitor	ChemblInteractions
FLT1	FLT1	Definite	FLT1	SORAFENIB TOSYLATE	inhibitor	ChemblInteractions
FLT1	FLT1	Definite	FLT1	SUNITINIB	inhibitor	TALC|DTC|TdgClinicalTrial|DrugBank|TEND|CGI|MyCancerGenomeClinicalTrial|PharmGKB	21478036|19248971|26935927|23583911|17367763|20124951|24086736|14654525
FLT1	FLT1	Definite	FLT1	PAZOPANIB	inhibitor	TALC|DTC|MyCancerGenome|TdgClinicalTrial|DrugBank|MyCancerGenomeClinicalTrial|GuideToPharmacologyInteractions	17288876
FLT1	FLT1	Definite	FLT1	PEXIDARTINIB	inhibitor	GuideToPharmacologyInteractions
FLT1	FLT1	Definite	FLT1	VANDETANIB	inhibitor	DTC|TdgClinicalTrial|ClearityFoundationClinicalTrial|ChemblInteractions|MyCancerGenomeClinicalTrial
FLT1	FLT1	Definite	FLT1	SUNITINIB MALATE	inhibitor	ChemblInteractions
FLT1	FLT1	Definite	FLT1	LENVATINIB	inhibitor	TALC|TdgClinicalTrial|DrugBank	17943726
FLT1	FLT1	Definite	FLT1	SORAFENIB	inhibitor	DTC|MyCancerGenome|DrugBank|MyCancerGenomeClinicalTrial|PharmGKB	17016424|28362716|15466206|16507829
FLT1	FLT1	Definite	FLT1	NINTEDANIB ESYLATE	inhibitor	ChemblInteractions
FLT1	FLT1	Definite	FLT1	NINTEDANIB	inhibitor	TALC|MyCancerGenome|TdgClinicalTrial|ClearityFoundationClinicalTrial|DrugBank|GuideToPharmacologyInteractions	18559524|31016670
FLT1	FLT1	Definite	FLT1	RABEPRAZOLE SODIUM	inhibitor	MyCancerGenome|TTD
FLT1	FLT1	Definite	FLT1	AXITINIB	inhibitor	TALC|MyCancerGenome|TdgClinicalTrial|DrugBank|ChemblInteractions|CancerCommons|MyCancerGenomeClinicalTrial|PharmGKB	20124951|18541897
FLT1	FLT1	Definite	FLT1	FOSTAMATINIB	inhibitor	DrugBank	26516587
FLT1	FLT1	Definite	FLT1	TIVOZANIB	inhibitor	TALC|MyCancerGenome|TdgClinicalTrial|ClearityFoundationClinicalTrial|ChemblInteractions|TTD|CancerCommons|GuideToPharmacologyInteractions
FLT1	FLT1	Definite	FLT1	LENVATINIB MESYLATE	inhibitor	ChemblInteractions
FLT1	FLT1	Definite	FLT1	REGORAFENIB	inhibitor	TALC|MyCancerGenome|DrugBank|ChemblInteractions|MyCancerGenomeClinicalTrial
CDKN1A	CDKN1A	Definite	CDKN1A	ROMIDEPSIN		NCI	15014036
CDKN1A	CDKN1A	Definite	CDKN1A	EPOETIN BETA		NCI	11023508
CDKN1A	CDKN1A	Definite	CDKN1A	PACLITAXEL		NCI	12574211
CDKN1A	CDKN1A	Definite	CDKN1A	CARBOPLATIN		NCI	12168940
CDKN1A	CDKN1A	Definite	CDKN1A	VINBLASTINE		NCI	8763853
CDKN1A	CDKN1A	Definite	CDKN1A	ACETAMINOPHEN		NCI	16330492
CDKN1A	CDKN1A	Definite	CDKN1A	IRINOTECAN HYDROCHLORIDE		NCI	12032863
CDKN1A	CDKN1A	Definite	CDKN1A	PENTETIC ACID		NCI	9343371
CDKN1A	CDKN1A	Definite	CDKN1A	DICUMAROL		NCI	9343371
CDKN1A	CDKN1A	Definite	CDKN1A	NICOTINE		NCI	16011614
CDKN1A	CDKN1A	Definite	CDKN1A	FLUTAMIDE		NCI	16281084
CDKN1A	CDKN1A	Definite	CDKN1A	MELPHALAN		NCI	11507071
CDKN1A	CDKN1A	Definite	CDKN1A	CLADRIBINE		NCI	12473386
CDKN1A	CDKN1A	Definite	CDKN1A	FLUOROURACIL		NCI	24708484|15067352
CDKN1A	CDKN1A	Definite	CDKN1A	CYCLOSPORINE		NCI	11827957
MYLIP	MYLIP	Definite	MYLIP	ATORVASTATIN		PharmGKB	25171759
SFPQ	SFPQ	Definite	SFPQ	COPPER		DrugBank	15359738
SFPQ	SFPQ	Definite	SFPQ	ARTENIMOL	ligand	DrugBank	26340163
PDE3A	PDE3A	Definite	PDE3A	THEOPHYLLINE SODIUM GLYCINATE	inhibitor	ChemblInteractions
PDE3A	PDE3A	Definite	PDE3A	DIPYRIDAMOLE	inhibitor	ChemblInteractions
PDE3A	PDE3A	Definite	PDE3A	OXTRIPHYLLINE	inhibitor	DrugBank|ChemblInteractions|TTD	15237094|16651698|12887610
PDE3A	PDE3A	Definite	PDE3A	HYDROCHLOROTHIAZIDE		PharmGKB	31327267
PDE3A	PDE3A	Definite	PDE3A	MILRINONE	inhibitor	TdgClinicalTrial|DrugBank|TEND|TTD|GuideToPharmacologyInteractions	12181427|10859452|12135876|10511123|12652111|11752352
PDE3A	PDE3A	Definite	PDE3A	ANAGRELIDE	inhibitor	DrugBank|TTD|GuideToPharmacologyInteractions	2846839|11752352|17139284|17016423|31598394
PDE3A	PDE3A	Definite	PDE3A	AMINOPHYLLINE	inhibitor	DrugBank|ChemblInteractions|TTD	11939921|11752352
PDE3A	PDE3A	Definite	PDE3A	CILOSTAZOL	inhibitor	TdgClinicalTrial|DrugBank|ChemblInteractions|TEND|TTD|GuideToPharmacologyInteractions	16472148|18282775|19218671|12180353|11752352
PDE3A	PDE3A	Definite	PDE3A	DYPHYLLINE	inhibitor	ChemblInteractions
PDE3A	PDE3A	Definite	PDE3A	INAMRINONE LACTATE	inhibitor	ChemblInteractions
PDE3A	PDE3A	Definite	PDE3A	THEOPHYLLINE	inhibitor	TdgClinicalTrial|DrugBank|ChemblInteractions|TEND	15237094|16651698|12887610
PDE3A	PDE3A	Definite	PDE3A	INAMRINONE	inhibitor	TdgClinicalTrial|DrugBank|TEND|GuideToPharmacologyInteractions	18468627|12076859|11752352|19901885
PDE3A	PDE3A	Definite	PDE3A	MILRINONE LACTATE	inhibitor	ChemblInteractions
PDE3A	PDE3A	Definite	PDE3A	ENOXIMONE	inhibitor	TdgClinicalTrial|DrugBank|TEND|TTD|GuideToPharmacologyInteractions	17714066|16987374
PDE3A	PDE3A	Definite	PDE3A	PENTOXIFYLLINE	inhibitor	ChemblInteractions
PDE3A	PDE3A	Definite	PDE3A	ANAGRELIDE HYDROCHLORIDE	inhibitor	ChemblInteractions
JUNB	JUNB	Definite	JUNB	INSULIN		NCI	8264634
JUNB	JUNB	Definite	JUNB	DEXAMETHASONE		NCI	9024781
ACACB	ACACB	Definite	ACACB	BIOTIN	cofactor	DrugBank	16772434|17477831
ACACB	ACACB	Definite	ACACB	METFORMIN		TTD
DUSP6	DUSP6	Definite	DUSP6	TRAMETINIB			22169769
ADCYAP1	ADCYAP1	Definite	ADCYAP1	STREPTOZOCIN		NCI	9864055
ADCYAP1	ADCYAP1	Definite	ADCYAP1	PROPRANOLOL		NCI	9353360
ATRX	ATRX	Definite	ATRX	IRINOTECAN		JAX-CKB	26936505
ATRX	ATRX	Definite	ATRX	VINCRISTINE			23904111
ATRX	ATRX	Definite	ATRX	GEMCITABINE		JAX-CKB	26853339
ATRX	ATRX	Definite	ATRX	TOPOTECAN		JAX-CKB	26936505
ATRX	ATRX	Definite	ATRX	DOXORUBICIN		JAX-CKB	26936505
ATRX	ATRX	Definite	ATRX	OLAPARIB		JAX-CKB	31806540
ATRX	ATRX	Definite	ATRX	PROCARBAZINE			23904111
ATRX	ATRX	Definite	ATRX	TEMOZOLOMIDE			23904111
ATRX	ATRX	Definite	ATRX	LOMUSTINE			23904111
ITGB1	ITGB1	Definite	ITGB1	NATALIZUMAB	antibody|inhibitor	ChemblInteractions|GuideToPharmacologyInteractions
SCN1B	SCN1B	Definite	SCN1B	PHENYTOIN		DrugBank	15922564
SCN1B	SCN1B	Definite	SCN1B	ZONISAMIDE	inhibitor	TdgClinicalTrial|DrugBank	19557119|20001433|19948168|15511691|20025128|14704463|18433351
HIF1A	HIF1A	Definite	HIF1A	CLOTRIMAZOLE		DTC
HIF1A	HIF1A	Definite	HIF1A	AMCINONIDE		DTC
HIF1A	HIF1A	Definite	HIF1A	DESOXIMETASONE		DTC
HIF1A	HIF1A	Definite	HIF1A	ISOPROTERENOL		DTC
HIF1A	HIF1A	Definite	HIF1A	VINCRISTINE SULFATE		DTC
HIF1A	HIF1A	Definite	HIF1A	NICLOSAMIDE		DTC
HIF1A	HIF1A	Definite	HIF1A	BENZBROMARONE		DTC
HIF1A	HIF1A	Definite	HIF1A	HYDROQUINONE		DTC
HIF1A	HIF1A	Definite	HIF1A	ISOETHARINE MESYLATE		DTC
HIF1A	HIF1A	Definite	HIF1A	ETHAMSYLATE		DTC
HIF1A	HIF1A	Definite	HIF1A	PHENOXYBENZAMINE HYDROCHLORIDE		DTC
HIF1A	HIF1A	Definite	HIF1A	DEQUALINIUM		DTC
HIF1A	HIF1A	Definite	HIF1A	EPINEPHRINE		DTC
HIF1A	HIF1A	Definite	HIF1A	PROMAZINE		DTC
HIF1A	HIF1A	Definite	HIF1A	SUNITINIB		CGI
HIF1A	HIF1A	Definite	HIF1A	OXATOMIDE		DTC
HIF1A	HIF1A	Definite	HIF1A	MEFENAMIC ACID		DTC
HIF1A	HIF1A	Definite	HIF1A	CARVEDILOL	modulator	DrugBank	15732037
HIF1A	HIF1A	Definite	HIF1A	OXYTETRACYCLINE		DTC
HIF1A	HIF1A	Definite	HIF1A	TRIAMTERENE		DTC
HIF1A	HIF1A	Definite	HIF1A	EPOETIN ALFA		NCI	11986208|11971899|12717822
HIF1A	HIF1A	Definite	HIF1A	LORATADINE		DTC
HIF1A	HIF1A	Definite	HIF1A	TOLFENAMIC ACID		DTC
HIF1A	HIF1A	Definite	HIF1A	SORAFENIB		PharmGKB	25816720
HIF1A	HIF1A	Definite	HIF1A	EPINEPHRINE BITARTRATE		DTC
HIF1A	HIF1A	Definite	HIF1A	PIRETANIDE		DTC
HIF1A	HIF1A	Definite	HIF1A	DICLOFENAC SODIUM		DTC
HIF1A	HIF1A	Definite	HIF1A	CYCLOSERINE		DTC
HIF1A	HIF1A	Definite	HIF1A	NITROGLYCERIN	inhibitor	MyCancerGenomeClinicalTrial
HIF1A	HIF1A	Definite	HIF1A	LEVONORDEFRIN		DTC
HIF1A	HIF1A	Definite	HIF1A	HYDROCORTISONE		DTC
HIF1A	HIF1A	Definite	HIF1A	DEFEROXAMINE		NCI	15780758
HIF1A	HIF1A	Definite	HIF1A	INAMRINONE		DTC
HIF1A	HIF1A	Definite	HIF1A	TOPOTECAN HYDROCHLORIDE		DTC
HIF1A	HIF1A	Definite	HIF1A	TRETINOIN		DTC
HIF1A	HIF1A	Definite	HIF1A	PIMOZIDE		DTC
HIF1A	HIF1A	Definite	HIF1A	NOSCAPINE		TdgClinicalTrial
HIF1A	HIF1A	Definite	HIF1A	FLUFENAMIC ACID		DTC
HIF1A	HIF1A	Definite	HIF1A	HYDRALAZINE	inducer	DrugBank	15192023
HIF1A	HIF1A	Definite	HIF1A	NIFEDIPINE		DTC
HIF1A	HIF1A	Definite	HIF1A	DOPAMINE		DTC
HIF1A	HIF1A	Definite	HIF1A	SULFASALAZINE		DTC
HIF1A	HIF1A	Definite	HIF1A	AXITINIB		PharmGKB	25816720
HIF1A	HIF1A	Definite	HIF1A	NOREPINEPHRINE BITARTRATE		DTC
PTGIS	PTGIS	Definite	PTGIS	EPOPROSTENOL	inducer	DrugBank	20357747|18081314
PLK2	PLK2	Definite	PLK2	FOSTAMATINIB	inhibitor	DrugBank	26516587
YWHAE	YWHAE	Definite	YWHAE	INSULIN		NCI	16216880
CD38	CD38	Definite	CD38	DARATUMUMAB	inhibitor|antibody	MyCancerGenome|TdgClinicalTrial|DrugBank|ChemblInteractions|TTD|GuideToPharmacologyInteractions	21187443
CD38	CD38	Definite	CD38	THROMBIN		NCI	9654134
GSN	GSN	Definite	GSN	METHYLDOPA		DrugBank	23896426
GSN	GSN	Definite	GSN	COPPER		DrugBank	23896426
UMPS	UMPS	Definite	UMPS	LEUCOVORIN		PharmGKB	20647221|16818689
UMPS	UMPS	Definite	UMPS	CAPECITABINE		PharmGKB	20647221|28347776|16818689
UMPS	UMPS	Definite	UMPS	TEGAFUR		PharmGKB	20647221|16818689
UMPS	UMPS	Definite	UMPS	FLUOROURACIL		PharmGKB	20647221|16818689
NDUFS2	NDUFS2	Definite	NDUFS2	METFORMIN HYDROCHLORIDE	inhibitor	ChemblInteractions
STAG2	STAG2	Definite	STAG2	DABRAFENIB		JAX-CKB	27500726
STAG2	STAG2	Definite	STAG2	TRAMETINIB		JAX-CKB	27500726
STAG2	STAG2	Definite	STAG2	RUCAPARIB		JAX-CKB	21852505|24356817
STAG2	STAG2	Definite	STAG2	VEMURAFENIB		JAX-CKB	27500726
STAG2	STAG2	Definite	STAG2	OLAPARIB		JAX-CKB	21852505|24356817
STAG2	STAG2	Definite	STAG2	TEMOZOLOMIDE		JAX-CKB	21852505|24356817
STAG2	STAG2	Definite	STAG2	CISPLATIN		JAX-CKB	31157248
HERC2	HERC2	Definite	HERC2	NERATINIB		DoCM	23220880
PSMC4	PSMC4	Definite	PSMC4	IXAZOMIB CITRATE	inhibitor	ChemblInteractions
PSMC4	PSMC4	Definite	PSMC4	CARFILZOMIB	inhibitor	DTC|MyCancerGenome|ChemblInteractions	24524217
PSMC4	PSMC4	Definite	PSMC4	BORTEZOMIB	inhibitor	DTC|MyCancerGenome|ChemblInteractions	24524217
CTPS1	CTPS1	Definite	CTPS1	GLUTAMINE	substrate|antagonist	DrugBank	17137369|24870241|16427816|17331943
TP53	TP53	Definite	TP53	PAZOPANIB			26646755|25669829
TP53	TP53	Definite	TP53	PIMOZIDE		DTC
TP53	TP53	Definite	TP53	PEMBROLIZUMAB			28039262
TP53	TP53	Definite	TP53	OXALIPLATIN			24957073|21468686
TP53	TP53	Definite	TP53	MITOMYCIN			14514923
TP53	TP53	Definite	TP53	DECITABINE		CGI
TP53	TP53	Definite	TP53	ETOPOSIDE			25964101|14514923
TP53	TP53	Definite	TP53	CRIZOTINIB			25971938|27149990|26438783
TP53	TP53	Definite	TP53	CHLORPROMAZINE		DTC
TP53	TP53	Definite	TP53	MAPROTILINE		DTC
TP53	TP53	Definite	TP53	RIBAVIRIN		DTC
TP53	TP53	Definite	TP53	PROGESTERONE		NCI	16684279
TP53	TP53	Definite	TP53	DOPAMINE		DTC
TP53	TP53	Definite	TP53	NORTRIPTYLINE		DTC
TP53	TP53	Definite	TP53	TOPOTECAN			26438783
TP53	TP53	Definite	TP53	TRIFLUPROMAZINE		DTC
TP53	TP53	Definite	TP53	TRICLOCARBAN		DTC
TP53	TP53	Definite	TP53	FLUOROURACIL		DTC|PharmGKB
TP53	TP53	Definite	TP53	PROCHLORPERAZINE		DTC
TP53	TP53	Definite	TP53	DAUNORUBICIN HYDROCHLORIDE		DTC
TP53	TP53	Definite	TP53	ETHOPROPAZINE HYDROCHLORIDE		DTC
TP53	TP53	Definite	TP53	PERPHENAZINE		DTC
TP53	TP53	Definite	TP53	DOXORUBICIN		DTC|CGI	25658463|21399868|16243804|23165797|26826118|26288684|22698404|17363498|9569050
TP53	TP53	Definite	TP53	VEMURAFENIB			26343583|28514312
TP53	TP53	Definite	TP53	DUVELISIB
TP53	TP53	Definite	TP53	VENETOCLAX		PharmGKB|FDA
TP53	TP53	Definite	TP53	HEXACHLOROPHENE		DTC
TP53	TP53	Definite	TP53	GEMCITABINE		CGI	27167172|23520471|21389100|27815358|26228206
TP53	TP53	Definite	TP53	OLAPARIB			22172724
TP53	TP53	Definite	TP53	TAMOXIFEN		DTC	10786679
TP53	TP53	Definite	TP53	TAMOXIFEN CITRATE		DTC
TP53	TP53	Definite	TP53	METHOTREXATE		DTC	17363498
TP53	TP53	Definite	TP53	CYCLOPHOSPHAMIDE		PharmGKB	17388661|16243804|26438783
TP53	TP53	Definite	TP53	ALPELISIB			27659046
TP53	TP53	Definite	TP53	CLEMASTINE		DTC
TP53	TP53	Definite	TP53	CLOMIPRAMINE		DTC
TP53	TP53	Definite	TP53	ERLOTINIB			27659046
TP53	TP53	Definite	TP53	HYDRALAZINE HYDROCHLORIDE		DTC
TP53	TP53	Definite	TP53	CHLOROXINE		DTC
TP53	TP53	Definite	TP53	PACLITAXEL		NCI	16459017
TP53	TP53	Definite	TP53	CLOFIBRATE		DTC	16680159
TP53	TP53	Definite	TP53	GRANISETRON		ClearityFoundationClinicalTrial
TP53	TP53	Definite	TP53	IFOSFAMIDE			23165797
TP53	TP53	Definite	TP53	MELPHALAN		DTC
TP53	TP53	Definite	TP53	WARFARIN		DTC
TP53	TP53	Definite	TP53	TRIFLUOPERAZINE		DTC|NCI	12415616
TP53	TP53	Definite	TP53	PROPYLTHIOURACIL		NCI	7790147
TP53	TP53	Definite	TP53	SERTRALINE HYDROCHLORIDE		DTC
TP53	TP53	Definite	TP53	ABEMACICLIB		CGI	27217383
TP53	TP53	Definite	TP53	ANISINDIONE		DTC
TP53	TP53	Definite	TP53	METHIMAZOLE		NCI	7790147
TP53	TP53	Definite	TP53	METHYLDOPA		DrugBank	17327663
TP53	TP53	Definite	TP53	CISPLATIN		NCI|CGI	25376608|25567130|9600935|11595686|25964101|23428903|26086967|11812076|27179933|8678559|14514923|23839309|28652249|18618574|26294215
TP53	TP53	Definite	TP53	METHYLENE BLUE		DTC
TP53	TP53	Definite	TP53	BEVACIZUMAB			27466356|23670029|17145525
TP53	TP53	Definite	TP53	EPIRUBICIN		PharmGKB	17388661|22903472
TP53	TP53	Definite	TP53	SALMETEROL XINAFOATE		DTC
TP53	TP53	Definite	TP53	MECHLORETHAMINE HYDROCHLORIDE		DTC
TP53	TP53	Definite	TP53	CLOTRIMAZOLE		DTC	16680159
TP53	TP53	Definite	TP53	LORLATINIB			28285684
TP53	TP53	Definite	TP53	MITOXANTRONE HYDROCHLORIDE		DTC
TP53	TP53	Definite	TP53	MENADIONE		DTC
TP53	TP53	Definite	TP53	CLADRIBINE		DTC
TP53	TP53	Definite	TP53	PRAMLINTIDE		CGI
TP53	TP53	Definite	TP53	HALOPERIDOL		NCI	16476148
TP53	TP53	Definite	TP53	BENZALKONIUM CHLORIDE		DTC
TP53	TP53	Definite	TP53	TRIFLURIDINE			25700705
TP53	TP53	Definite	TP53	PANITUMUMAB			28514312
TP53	TP53	Definite	TP53	PROCHLORPERAZINE EDISYLATE		DTC
TP53	TP53	Definite	TP53	TEMOZOLOMIDE			21730979
TP53	TP53	Definite	TP53	DABRAFENIB			27659046
TP53	TP53	Definite	TP53	SULCONAZOLE NITRATE		DTC
TP53	TP53	Definite	TP53	CHLORAMBUCIL		DTC
TP53	TP53	Definite	TP53	SERTRALINE		DTC	16680159
TP53	TP53	Definite	TP53	LOPERAMIDE		DTC
TP53	TP53	Definite	TP53	CINNARIZINE		DTC	16680159
TP53	TP53	Definite	TP53	FENOFIBRATE		DTC	16680159
TP53	TP53	Definite	TP53	MERCAPTOPURINE		DTC
TP53	TP53	Definite	TP53	APOMORPHINE		DTC
TP53	TP53	Definite	TP53	VORINOSTAT			26009011|25669829
TP53	TP53	Definite	TP53	IBRUTINIB			26563132
TP53	TP53	Definite	TP53	FURAZOLIDONE		DTC
TP53	TP53	Definite	TP53	ENALAPRIL		NCI	16900775
TP53	TP53	Definite	TP53	AZACITIDINE		DTC
TP53	TP53	Definite	TP53	DAUNORUBICIN			16243804
TP53	TP53	Definite	TP53	BORTEZOMIB	inhibitor	TALC
TP53	TP53	Definite	TP53	MITOXANTRONE		DTC
TP53	TP53	Definite	TP53	DOCETAXEL			21399868|22425996
TP53	TP53	Definite	TP53	CARBOPLATIN			25567130|25658463|11595686|26494859|27998224
TP53	TP53	Definite	TP53	RITUXIMAB		NCI	11895917
TP53	TP53	Definite	TP53	DOXORUBICIN HYDROCHLORIDE		DTC
TP53	TP53	Definite	TP53	CYTARABINE
TP53	TP53	Definite	TP53	METHYLPREDNISOLONE		NCI	16684279
TP53	TP53	Definite	TP53	FLUPHENAZINE		DTC
TP53	TP53	Definite	TP53	TRAMETINIB			27659046
TP53	TP53	Definite	TP53	CETUXIMAB			24957073
TP53	TP53	Definite	TP53	CAPECITABINE			24957073
TP53	TP53	Definite	TP53	NITAZOXANIDE		DTC
TP53	TP53	Definite	TP53	ENCORAFENIB
TP53	TP53	Definite	TP53	RALOXIFENE		DTC
TP53	TP53	Definite	TP53	AZATHIOPRINE		DTC
TP53	TP53	Definite	TP53	NICLOSAMIDE		DTC
TP53	TP53	Definite	TP53	TRIAMTERENE		DTC
TP53	TP53	Definite	TP53	ECONAZOLE NITRATE		DTC
TP53	TP53	Definite	TP53	THIMEROSAL		DTC
TP53	TP53	Definite	TP53	AMOXAPINE		DTC
TP53	TP53	Definite	TP53	DASATINIB			26855149
TP53	TP53	Definite	TP53	IRINOTECAN			25567130
TP53	TP53	Definite	TP53	SIROLIMUS		NCI	26144316|16651424
TP53	TP53	Definite	TP53	PAROXETINE HYDROCHLORIDE		DTC
MARK4	MARK4	Definite	MARK4	FOSTAMATINIB	inhibitor	DrugBank	26516587
DYRK1A	DYRK1A	Definite	DYRK1A	FOSTAMATINIB	inhibitor	DrugBank	26516587
DYRK1A	DYRK1A	Definite	DYRK1A	PALBOCICLIB		DTC
DYRK1A	DYRK1A	Definite	DYRK1A	RUCAPARIB		DTC
ITPR1	ITPR1	Definite	ITPR1	CAFFEINE	inhibitor|antagonist	DrugBank|GuideToPharmacologyInteractions	1844813
ITPR1	ITPR1	Definite	ITPR1	NITROPRUSSIDE		TTD
ITPR1	ITPR1	Definite	ITPR1	GLYCERIN		DrugBank	10592235|17139284|17016423
TUBB2A	TUBB2A	Definite	TUBB2A	VINFLUNINE	inhibitor	ChemblInteractions
TUBB2A	TUBB2A	Definite	TUBB2A	VINORELBINE		DTC|TdgClinicalTrial|TEND	25768699
TUBB2A	TUBB2A	Definite	TUBB2A	VINCRISTINE SULFATE	inhibitor	ChemblInteractions
TUBB2A	TUBB2A	Definite	TUBB2A	BRENTUXIMAB VEDOTIN	inhibitor	ChemblInteractions
TUBB2A	TUBB2A	Definite	TUBB2A	VORINOSTAT		DTC	20491440
TUBB2A	TUBB2A	Definite	TUBB2A	COLCHICINE	inhibitor	DTC|TdgClinicalTrial|ChemblInteractions	23750455|25805446|24502232|25061803|25937236|24773591|25938266
TUBB2A	TUBB2A	Definite	TUBB2A	PODOFILOX		DTC	17765552|24953821|21402478
TUBB2A	TUBB2A	Definite	TUBB2A	VINBLASTINE		DTC|TdgClinicalTrial|TEND	23708010|23916255
TUBB2A	TUBB2A	Definite	TUBB2A	DOCETAXEL	inhibitor	ChemblInteractions
TUBB2A	TUBB2A	Definite	TUBB2A	VINORELBINE TARTRATE	inhibitor	ChemblInteractions
TUBB2A	TUBB2A	Definite	TUBB2A	IXABEPILONE	inhibitor	ChemblInteractions|TEND
TUBB2A	TUBB2A	Definite	TUBB2A	VINCRISTINE		DTC|TdgClinicalTrial|TEND	16539377|21664138|23916255
TUBB2A	TUBB2A	Definite	TUBB2A	VINBLASTINE SULFATE	inhibitor	ChemblInteractions
TUBB2A	TUBB2A	Definite	TUBB2A	ERIBULIN MESYLATE	inhibitor	ChemblInteractions
TUBB2A	TUBB2A	Definite	TUBB2A	PACLITAXEL	inhibitor	DTC|ChemblInteractions	23631389|25369367|25768699|24457094|22595423|23313639|17887662|23387901|19758808|23725535|24953821
TUBB2A	TUBB2A	Definite	TUBB2A	TRASTUZUMAB EMTANSINE	inhibitor	ChemblInteractions
TUBB2A	TUBB2A	Definite	TUBB2A	CABAZITAXEL	inhibitor	ChemblInteractions
CACNA1B	CACNA1B	Definite	CACNA1B	VERAPAMIL	inhibitor	DrugBank	10385261|19125880
CACNA1B	CACNA1B	Definite	CACNA1B	SAFINAMIDE		TdgClinicalTrial
CACNA1B	CACNA1B	Definite	CACNA1B	GABAPENTIN	inhibitor|modulator	TdgClinicalTrial|DrugBank|ChemblInteractions|TEND	20588320|16368827|18299583
CACNA1B	CACNA1B	Definite	CACNA1B	NIFEDIPINE		DTC
CACNA1B	CACNA1B	Definite	CACNA1B	PREGABALIN	modulator	ChemblInteractions
CACNA1B	CACNA1B	Definite	CACNA1B	ZICONOTIDE ACETATE	blocker	ChemblInteractions
CACNA1B	CACNA1B	Definite	CACNA1B	BEPRIDIL HYDROCHLORIDE	blocker	ChemblInteractions
CACNA1B	CACNA1B	Definite	CACNA1B	LEVETIRACETAM	inhibitor|blocker	TdgClinicalTrial|DrugBank|ChemblInteractions	17461889|11879381
CACNA1B	CACNA1B	Definite	CACNA1B	GABAPENTIN ENACARBIL	modulator	TdgClinicalTrial|ChemblInteractions
CACNA1B	CACNA1B	Definite	CACNA1B	ZICONOTIDE	inhibitor	TdgClinicalTrial|DrugBank|TTD	28320042|24382884|8102803|21150297|26344359|27756538|2441741
CACNA1B	CACNA1B	Definite	CACNA1B	CLEVIDIPINE		TEND
CACNA1B	CACNA1B	Definite	CACNA1B	AMLODIPINE	inhibitor	DrugBank|TEND	11426839|10525060|10374627|20097194|28611661|9249249|19634509
CMPK1	CMPK1	Definite	CMPK1	CISPLATIN		PharmGKB	21642870
CMPK1	CMPK1	Definite	CMPK1	LAMIVUDINE		PharmGKB
CMPK1	CMPK1	Definite	CMPK1	GEMCITABINE	inhibitor	DrugBank|PharmGKB	15550676|21642870|17565005|22838949|22838950|24361227|16041392|17000136
IFNAR2	IFNAR2	Definite	IFNAR2	INTERFERON ALFA-2B	binder|agonist	ChemblInteractions	11752352|17139284|17016423|7584665
IFNAR2	IFNAR2	Definite	IFNAR2	INTERFERON BETA-1B	agonist	ChemblInteractions
IFNAR2	IFNAR2	Definite	IFNAR2	INTERFERON ALFA-N3	agonist	ChemblInteractions
IFNAR2	IFNAR2	Definite	IFNAR2	INTERFERON ALFACON-1	agonist	ChemblInteractions
IFNAR2	IFNAR2	Definite	IFNAR2	PEGINTERFERON ALFA-2B	agonist	ChemblInteractions
IFNAR2	IFNAR2	Definite	IFNAR2	PEGINTERFERON BETA-1A	agonist	ChemblInteractions
IFNAR2	IFNAR2	Definite	IFNAR2	INTERFERON BETA-1A	agonist	ChemblInteractions
IFNAR2	IFNAR2	Definite	IFNAR2	PEGINTERFERON ALFA-2A	agonist	ChemblInteractions
IFNAR2	IFNAR2	Definite	IFNAR2	INTERFERON ALFA-2A	agonist	ChemblInteractions
NDUFB11	NDUFB11	Definite	NDUFB11	METFORMIN HYDROCHLORIDE	inhibitor	ChemblInteractions
RPL23A	RPL23A	Definite	RPL23A	ARTENIMOL	ligand	DrugBank	26340163
TARDBP	TARDBP	Definite	TARDBP	SIMVASTATIN		DTC
TARDBP	TARDBP	Definite	TARDBP	ESTRONE		DTC
TARDBP	TARDBP	Definite	TARDBP	RILUZOLE		DTC
TARDBP	TARDBP	Definite	TARDBP	METHOTREXATE		DTC
TARDBP	TARDBP	Definite	TARDBP	CHENODIOL		DTC
TARDBP	TARDBP	Definite	TARDBP	NAPROXEN SODIUM		DTC
TARDBP	TARDBP	Definite	TARDBP	FLUCONAZOLE		DTC
TARDBP	TARDBP	Definite	TARDBP	FORMESTANE		DTC
TARDBP	TARDBP	Definite	TARDBP	BIFONAZOLE		DTC
TARDBP	TARDBP	Definite	TARDBP	DEXIBUPROFEN		DTC
TARDBP	TARDBP	Definite	TARDBP	ARTEMISININ		DTC
TARDBP	TARDBP	Definite	TARDBP	DICLOFENAC SODIUM		DTC
TARDBP	TARDBP	Definite	TARDBP	PRASTERONE		DTC
TARDBP	TARDBP	Definite	TARDBP	IBUPROFEN		DTC
TARDBP	TARDBP	Definite	TARDBP	PROGESTERONE		DTC
TARDBP	TARDBP	Definite	TARDBP	FLURBIPROFEN		DTC
TARDBP	TARDBP	Definite	TARDBP	TESTOSTERONE PROPIONATE		DTC
GABBR1	GABBR1	Definite	GABBR1	BACLOFEN	agonist	TdgClinicalTrial|DrugBank|ChemblInteractions|NCI|TEND|GuideToPharmacologyInteractions	7674378|10482760|8388192|10444662|19303900|10386831|9486305|22559224|10094428|10545129|11752352|10494996|16182939
GABBR1	GABBR1	Definite	GABBR1	TAURINE	agonist	DrugBank	29123472
GABBR1	GABBR1	Definite	GABBR1	SODIUM OXYBATE	agonist	ChemblInteractions
GABBR1	GABBR1	Definite	GABBR1	VIGABATRIN	agonist	TdgClinicalTrial	20655489
CD3E	CD3E	Definite	CD3E	BLINATUMOMAB	antibody	TdgClinicalTrial|ChemblInteractions|GuideToPharmacologyInteractions
CD3E	CD3E	Definite	CD3E	CATUMAXOMAB	agonist|antibody	TdgClinicalTrial|DrugBank|GuideToPharmacologyInteractions	20347527
CD3E	CD3E	Definite	CD3E	MUROMONAB-CD3	antibody|inhibitor|binder	TdgClinicalTrial|DrugBank|ChemblInteractions|TEND|TTD|GuideToPharmacologyInteractions	11752352|17139284|17016423
CBX5	CBX5	Definite	CBX5	COPPER		DrugBank	1268189
CBFB	CBFB	Definite	CBFB	PYROGALLOL		DTC
CBFB	CBFB	Definite	CBFB	TAMOXIFEN CITRATE		DTC
CBFB	CBFB	Definite	CBFB	CETIRIZINE HYDROCHLORIDE		DTC
CBFB	CBFB	Definite	CBFB	DISULFIRAM		DTC
CBFB	CBFB	Definite	CBFB	DAUNORUBICIN		DTC
CEP68	CEP68	Definite	CEP68	ASPIRIN		PharmGKB
ISYNA1	ISYNA1	Definite	ISYNA1	GLYCERIN		DrugBank	10592235|17139284|17016423
CRISPLD2	CRISPLD2	Definite	CRISPLD2	DEXAMETHASONE		PharmGKB	24926665
PI4K2A	PI4K2A	Definite	PI4K2A	ADENOSINE	inhibitor	GuideToPharmacologyInteractions
FLCN	FLCN	Definite	FLCN	EVEROLIMUS		CGI
MKNK2	MKNK2	Definite	MKNK2	FOSTAMATINIB	inhibitor	DrugBank	26516587
MKNK2	MKNK2	Definite	MKNK2	ERLOTINIB		DTC
MKNK2	MKNK2	Definite	MKNK2	GEFITINIB		DTC
MKNK2	MKNK2	Definite	MKNK2	SORAFENIB		DTC
PDE4A	PDE4A	Definite	PDE4A	APREMILAST	antagonist|inhibitor	TdgClinicalTrial|DrugBank|ChemblInteractions|TTD|GuideToPharmacologyInteractions	30775293|25864487|17352685
PDE4A	PDE4A	Definite	PDE4A	AMINOPHYLLINE	inhibitor	ChemblInteractions
PDE4A	PDE4A	Definite	PDE4A	DIPYRIDAMOLE	inhibitor	TdgClinicalTrial|DrugBank|ChemblInteractions|TEND	11752352
PDE4A	PDE4A	Definite	PDE4A	ILOPROST	inducer	DrugBank	12952271|11551870|12441759|2461561
PDE4A	PDE4A	Definite	PDE4A	TADALAFIL		TEND
PDE4A	PDE4A	Definite	PDE4A	THEOPHYLLINE SODIUM GLYCINATE	inhibitor	ChemblInteractions
PDE4A	PDE4A	Definite	PDE4A	ROFLUMILAST	inhibitor	TdgClinicalTrial|DrugBank|ChemblInteractions|TTD	17726343
PDE4A	PDE4A	Definite	PDE4A	CRISABOROLE	inhibitor	TdgClinicalTrial|DrugBank|ChemblInteractions|TTD	22841723
PDE4A	PDE4A	Definite	PDE4A	PENTOXIFYLLINE	inhibitor	TdgClinicalTrial|ChemblInteractions|TEND	11752352
PDE4A	PDE4A	Definite	PDE4A	AMLEXANOX	inhibitor	ChemblInteractions
PDE4A	PDE4A	Definite	PDE4A	FLAVOXATE HYDROCHLORIDE	inhibitor	ChemblInteractions
PDE4A	PDE4A	Definite	PDE4A	DYPHYLLINE	inhibitor	TdgClinicalTrial|DrugBank|ChemblInteractions|TEND|TTD	7925603|11752352|17139284|17016423|225216
PDE4A	PDE4A	Definite	PDE4A	MILRINONE		TdgClinicalTrial|TEND
PDE4A	PDE4A	Definite	PDE4A	INAMRINONE	inhibitor	DrugBank	14577594
PDE4A	PDE4A	Definite	PDE4A	THEOPHYLLINE	inhibitor	TdgClinicalTrial|DrugBank|ChemblInteractions|TEND	12547256|15351234|15253881|12421478|12887610
PDE4A	PDE4A	Definite	PDE4A	OXTRIPHYLLINE	inhibitor	DrugBank|ChemblInteractions|TTD	12547256|15351234|15253881|12421478|12887610
BAZ2B	BAZ2B	Definite	BAZ2B	PROCHLORPERAZINE EDISYLATE		DTC
BAZ2B	BAZ2B	Definite	BAZ2B	LANSOPRAZOLE		DTC
BAZ2B	BAZ2B	Definite	BAZ2B	BENZTHIAZIDE		DTC
BAZ2B	BAZ2B	Definite	BAZ2B	NIFEDIPINE		DTC
BAZ2B	BAZ2B	Definite	BAZ2B	CEFOTETAN		DTC
BAZ2B	BAZ2B	Definite	BAZ2B	MITOXANTRONE HYDROCHLORIDE		DTC
BAZ2B	BAZ2B	Definite	BAZ2B	MIANSERIN HYDROCHLORIDE		DTC
BAZ2B	BAZ2B	Definite	BAZ2B	MERCAPTOPURINE		DTC
BAZ2B	BAZ2B	Definite	BAZ2B	CARVEDILOL		DTC
BAZ2B	BAZ2B	Definite	BAZ2B	DEFERIPRONE		DTC
BAZ2B	BAZ2B	Definite	BAZ2B	MERCAPTOPURINE		DTC
BAZ2B	BAZ2B	Definite	BAZ2B	METERGOLINE		DTC
BAZ2B	BAZ2B	Definite	BAZ2B	CEPHALOTHIN SODIUM		DTC
BAZ2B	BAZ2B	Definite	BAZ2B	HEXACHLOROPHENE		DTC
BAZ2B	BAZ2B	Definite	BAZ2B	CLOTRIMAZOLE		DTC
BAZ2B	BAZ2B	Definite	BAZ2B	SERTACONAZOLE NITRATE		DTC
BAZ2B	BAZ2B	Definite	BAZ2B	PHTHALYLSULFATHIAZOLE		DTC
BAZ2B	BAZ2B	Definite	BAZ2B	ECONAZOLE NITRATE		DTC
BAZ2B	BAZ2B	Definite	BAZ2B	OXYTETRACYCLINE		DTC
BAZ2B	BAZ2B	Definite	BAZ2B	CEFACLOR		DTC
BAZ2B	BAZ2B	Definite	BAZ2B	TAMOXIFEN		DTC
BAZ2B	BAZ2B	Definite	BAZ2B	TANNIC ACID		DTC
BAZ2B	BAZ2B	Definite	BAZ2B	CHLORPROMAZINE HYDROCHLORIDE		DTC
BAZ2B	BAZ2B	Definite	BAZ2B	MICONAZOLE NITRATE		DTC
BAZ2B	BAZ2B	Definite	BAZ2B	CEPHAPIRIN SODIUM		DTC
BAZ2B	BAZ2B	Definite	BAZ2B	CHLORAMBUCIL		DTC
BAZ2B	BAZ2B	Definite	BAZ2B	LIOTHYRONINE SODIUM		DTC
BAZ2B	BAZ2B	Definite	BAZ2B	CEFOXITIN SODIUM		DTC
BAZ2B	BAZ2B	Definite	BAZ2B	METHYLDOPA		DTC
BAZ2B	BAZ2B	Definite	BAZ2B	CEFOTIAM HYDROCHLORIDE		DTC
BAZ2B	BAZ2B	Definite	BAZ2B	OMEPRAZOLE		DTC
BAZ2B	BAZ2B	Definite	BAZ2B	TRIFLUPROMAZINE HYDROCHLORIDE		DTC
BAZ2B	BAZ2B	Definite	BAZ2B	CICLOPIROX OLAMINE		DTC
BAZ2B	BAZ2B	Definite	BAZ2B	PROMETHAZINE HYDROCHLORIDE		DTC
BAZ2B	BAZ2B	Definite	BAZ2B	PROCHLORPERAZINE		DTC
BAZ2B	BAZ2B	Definite	BAZ2B	EPINEPHRINE BITARTRATE		DTC
BAZ2B	BAZ2B	Definite	BAZ2B	KETOCONAZOLE		DTC
BAZ2B	BAZ2B	Definite	BAZ2B	NALIDIXIC ACID		DTC
BAZ2B	BAZ2B	Definite	BAZ2B	ISOCONAZOLE		DTC
BAZ2B	BAZ2B	Definite	BAZ2B	TAMOXIFEN CITRATE		DTC
BAZ2B	BAZ2B	Definite	BAZ2B	BIFONAZOLE		DTC
BAZ2B	BAZ2B	Definite	BAZ2B	ZAFIRLUKAST		DTC
BAZ2B	BAZ2B	Definite	BAZ2B	IDEBENONE		DTC
BAZ2B	BAZ2B	Definite	BAZ2B	CHLORTETRACYCLINE HYDROCHLORIDE		DTC
BAZ2B	BAZ2B	Definite	BAZ2B	DAUNORUBICIN HYDROCHLORIDE		DTC
BAZ2B	BAZ2B	Definite	BAZ2B	PIROXICAM		DTC
BAZ2B	BAZ2B	Definite	BAZ2B	METHACYCLINE HYDROCHLORIDE		DTC
BAZ2B	BAZ2B	Definite	BAZ2B	TENOXICAM		DTC
BAZ2B	BAZ2B	Definite	BAZ2B	MIFEPRISTONE		DTC
BAZ2B	BAZ2B	Definite	BAZ2B	DOXORUBICIN HYDROCHLORIDE		DTC
BAZ2B	BAZ2B	Definite	BAZ2B	DEMECLOCYCLINE HYDROCHLORIDE		DTC
BAZ2B	BAZ2B	Definite	BAZ2B	RALOXIFENE HYDROCHLORIDE		DTC
GNAS	GNAS	Definite	GNAS	CRIZOTINIB		JAX-CKB	29636358
GNAS	GNAS	Definite	GNAS	MIFEPRISTONE		DTC
GNAS	GNAS	Definite	GNAS	NICLOSAMIDE		DTC
GNAS	GNAS	Definite	GNAS	AMITRIPTYLINE HYDROCHLORIDE		DTC
GNAS	GNAS	Definite	GNAS	CISPLATIN			19274060
GNAS	GNAS	Definite	GNAS	DOBUTAMINE		PharmGKB	19542315
GNAS	GNAS	Definite	GNAS	FLUOROURACIL			19274060
FDFT1	FDFT1	Definite	FDFT1	LOVASTATIN		NCI	7685352
SRSF4	SRSF4	Definite	SRSF4	ARTENIMOL	ligand	DrugBank	26340163
MDM2	MDM2	Definite	MDM2	CISPLATIN		CGI
MDM2	MDM2	Definite	MDM2	METHYLDOPA		DrugBank	16965791
SRC	SRC	Definite	SRC	CISPLATIN		JAX-CKB	27196758
SRC	SRC	Definite	SRC	ACALABRUTINIB	inhibitor	GuideToPharmacologyInteractions
SRC	SRC	Definite	SRC	DOXORUBICIN		NCI	7532928
SRC	SRC	Definite	SRC	GEMCITABINE		JAX-CKB	27196758
SRC	SRC	Definite	SRC	VANDETANIB	inhibitor	ChemblInteractions
SRC	SRC	Definite	SRC	BOSUTINIB	inhibitor	TALC|TdgClinicalTrial|DrugBank|ChemblInteractions|TTD|JAX-CKB|GuideToPharmacologyInteractions	27196758|18483306
SRC	SRC	Definite	SRC	PONATINIB	inhibitor	TdgClinicalTrial|DrugBank|JAX-CKB	26270481|19878872
SRC	SRC	Definite	SRC	IBRUTINIB	inhibitor	GuideToPharmacologyInteractions
SRC	SRC	Definite	SRC	NINTEDANIB	inhibitor	TALC|DrugBank	18559524|31016670
SRC	SRC	Definite	SRC	PACLITAXEL		JAX-CKB	22784709
SRC	SRC	Definite	SRC	DASATINIB	multitarget|inhibitor	TALC|DTC|TdgClinicalTrial|DrugBank|ChemblInteractions|TEND|TTD|CancerCommons|JAX-CKB|GuideToPharmacologyInteractions	27231123|17429625|16230377|19098899|19462975|17155893|27154914|27222538|25835317|11752352|17148760|16397263
SRC	SRC	Definite	SRC	LAPATINIB		JAX-CKB	26270481|25350844
SRC	SRC	Definite	SRC	FOSTAMATINIB	inhibitor	DrugBank	26516587
SRC	SRC	Definite	SRC	CLOZAPINE		NCI	15659539
SRC	SRC	Definite	SRC	CRIZOTINIB		JAX-CKB	29636358
SRC	SRC	Definite	SRC	CERITINIB		JAX-CKB	25394791
SRC	SRC	Definite	SRC	TRAMETINIB			27222538
GABRB1	GABRB1	Definite	GABRB1	CLOTIAZEPAM	potentiator	TdgClinicalTrial|TEND	18855614
GABRB1	GABRB1	Definite	GABRB1	SEVOFLURANE	positive modulator	ChemblInteractions
GABRB1	GABRB1	Definite	GABRB1	LORAZEPAM	positive modulator	TdgClinicalTrial|ChemblInteractions|TEND
GABRB1	GABRB1	Definite	GABRB1	ESTAZOLAM	potentiator|positive modulator	TdgClinicalTrial|ChemblInteractions|TEND	639854|2889803
GABRB1	GABRB1	Definite	GABRB1	CLORAZEPIC ACID		TdgClinicalTrial|TEND
GABRB1	GABRB1	Definite	GABRB1	BUTALBITAL	positive modulator	ChemblInteractions
GABRB1	GABRB1	Definite	GABRB1	DIAZEPAM	positive modulator|potentiator	TdgClinicalTrial|ChemblInteractions|TEND	18384456|11752090
GABRB1	GABRB1	Definite	GABRB1	ZALEPLON	positive modulator	ChemblInteractions
GABRB1	GABRB1	Definite	GABRB1	OXYBATE	agonist	DrugBank	15745703
GABRB1	GABRB1	Definite	GABRB1	FLUMAZENIL		ChemblInteractions
GABRB1	GABRB1	Definite	GABRB1	HALAZEPAM	positive modulator|potentiator	TdgClinicalTrial|ChemblInteractions|TEND	6738302|2867566
GABRB1	GABRB1	Definite	GABRB1	THIOPENTAL SODIUM	positive modulator	ChemblInteractions
GABRB1	GABRB1	Definite	GABRB1	MIDAZOLAM HYDROCHLORIDE	positive modulator	ChemblInteractions
GABRB1	GABRB1	Definite	GABRB1	GLUTETHIMIDE		ChemblInteractions
GABRB1	GABRB1	Definite	GABRB1	NITRAZEPAM	potentiator	TdgClinicalTrial|TEND	18384456|11752090
GABRB1	GABRB1	Definite	GABRB1	ESZOPICLONE	positive modulator	ChemblInteractions
GABRB1	GABRB1	Definite	GABRB1	ALCOHOL		DrugBank	17591544|12921221
GABRB1	GABRB1	Definite	GABRB1	FLURAZEPAM	potentiator	TdgClinicalTrial|TEND	18384456|11752090
GABRB1	GABRB1	Definite	GABRB1	ENFLURANE		ChemblInteractions
GABRB1	GABRB1	Definite	GABRB1	QUAZEPAM	potentiator|positive modulator	TdgClinicalTrial|ChemblInteractions|TEND	3017690|2892106
GABRB1	GABRB1	Definite	GABRB1	BUTABARBITAL SODIUM	positive modulator	ChemblInteractions
GABRB1	GABRB1	Definite	GABRB1	TALBUTAL	positive modulator	ChemblInteractions
GABRB1	GABRB1	Definite	GABRB1	ALPRAZOLAM	positive modulator	TdgClinicalTrial|ChemblInteractions|TEND
GABRB1	GABRB1	Definite	GABRB1	PRIMIDONE	positive modulator	ChemblInteractions
GABRB1	GABRB1	Definite	GABRB1	HALOTHANE	positive modulator	ChemblInteractions
GABRB1	GABRB1	Definite	GABRB1	THIAMYLAL SODIUM	positive modulator	ChemblInteractions
GABRB1	GABRB1	Definite	GABRB1	METHYPRYLON	positive modulator	ChemblInteractions
GABRB1	GABRB1	Definite	GABRB1	CHLORDIAZEPOXIDE	positive modulator	TdgClinicalTrial|ChemblInteractions|TEND
GABRB1	GABRB1	Definite	GABRB1	MIDAZOLAM	potentiator	TdgClinicalTrial|TEND	18384456|11752090
GABRB1	GABRB1	Definite	GABRB1	ACAMPROSATE CALCIUM		ChemblInteractions
GABRB1	GABRB1	Definite	GABRB1	ETHCHLORVYNOL		ChemblInteractions
GABRB1	GABRB1	Definite	GABRB1	BROMAZEPAM	potentiator	TdgClinicalTrial|TEND	18384456
GABRB1	GABRB1	Definite	GABRB1	CHLORDIAZEPOXIDE HYDROCHLORIDE	positive modulator	ChemblInteractions
GABRB1	GABRB1	Definite	GABRB1	TRICLOFOS SODIUM		ChemblInteractions
GABRB1	GABRB1	Definite	GABRB1	ISOFLURANE	positive modulator	ChemblInteractions
GABRB1	GABRB1	Definite	GABRB1	CLORAZEPATE DIPOTASSIUM	positive modulator	ChemblInteractions
GABRB1	GABRB1	Definite	GABRB1	MEPROBAMATE	agonist	ChemblInteractions
GABRB1	GABRB1	Definite	GABRB1	METHOHEXITAL SODIUM	positive modulator	ChemblInteractions
GABRB1	GABRB1	Definite	GABRB1	DESFLURANE	positive modulator	ChemblInteractions
GABRB1	GABRB1	Definite	GABRB1	TEMAZEPAM	positive modulator|potentiator	TdgClinicalTrial|ChemblInteractions|TEND	18384456|20138190
GABRB1	GABRB1	Definite	GABRB1	ETOMIDATE		DTC|ChemblInteractions	16884293
GABRB1	GABRB1	Definite	GABRB1	OXAZEPAM	potentiator|positive modulator	TdgClinicalTrial|ChemblInteractions|TEND	18384456|11752090
GABRB1	GABRB1	Definite	GABRB1	METHARBITAL	positive modulator	ChemblInteractions
GABRB1	GABRB1	Definite	GABRB1	CLONAZEPAM	positive modulator	TdgClinicalTrial|ChemblInteractions|TEND
GABRB1	GABRB1	Definite	GABRB1	TOPIRAMATE		ChemblInteractions
GABRB1	GABRB1	Definite	GABRB1	PROPOFOL	positive modulator	ChemblInteractions
GABRB1	GABRB1	Definite	GABRB1	PRAZEPAM	potentiator|positive modulator	TdgClinicalTrial|ChemblInteractions|TEND	7773620
GABRB1	GABRB1	Definite	GABRB1	CLOBAZAM	positive modulator	TdgClinicalTrial|ChemblInteractions|TEND
GABRB1	GABRB1	Definite	GABRB1	LINDANE	antagonist	DrugBank	12614680|7885191|12645305|7566682|20600211|10592235|17139284|14635176|17016423|9530529|8841090
GABRB1	GABRB1	Definite	GABRB1	KETAZOLAM	potentiator		18384456|11752090|15009644|2874815
TK1	TK1	Definite	TK1	IDOXURIDINE		TTD
TK1	TK1	Definite	TK1	ZIDOVUDINE		PharmGKB	22960662
TK1	TK1	Definite	TK1	PENCICLOVIR		TTD
LAMC3	LAMC3	Definite	LAMC3	OCRIPLASMIN		ChemblInteractions
MAPK1	MAPK1	Definite	MAPK1	ERLOTINIB			26181029
MAPK1	MAPK1	Definite	MAPK1	THIMEROSAL		DTC
MAPK1	MAPK1	Definite	MAPK1	LEVODOPA		NCI	16139809
MAPK1	MAPK1	Definite	MAPK1	LORATADINE		DTC
MAPK1	MAPK1	Definite	MAPK1	DIPHENHYDRAMINE HYDROCHLORIDE		DTC
MAPK1	MAPK1	Definite	MAPK1	CANTHARIDIN		DTC
MAPK1	MAPK1	Definite	MAPK1	ZALCITABINE		DTC
MAPK1	MAPK1	Definite	MAPK1	DOXORUBICIN HYDROCHLORIDE		DTC
MAPK1	MAPK1	Definite	MAPK1	ZAFIRLUKAST		DTC
MAPK1	MAPK1	Definite	MAPK1	TRIFLUOPERAZINE		DTC
MAPK1	MAPK1	Definite	MAPK1	BENZALKONIUM CHLORIDE		DTC
MAPK1	MAPK1	Definite	MAPK1	CHLORHEXIDINE HYDROCHLORIDE		DTC
MAPK1	MAPK1	Definite	MAPK1	BUMETANIDE		NCI	11807827
MAPK1	MAPK1	Definite	MAPK1	SORAFENIB		PharmGKB	20124951
MAPK1	MAPK1	Definite	MAPK1	CLOTRIMAZOLE		DTC
MAPK1	MAPK1	Definite	MAPK1	PIMOZIDE		DTC
MAPK1	MAPK1	Definite	MAPK1	PROGESTERONE		DTC
MAPK1	MAPK1	Definite	MAPK1	GENTIAN VIOLET		DTC
MAPK1	MAPK1	Definite	MAPK1	ECONAZOLE NITRATE		DTC
MAPK1	MAPK1	Definite	MAPK1	NIFEDIPINE		DTC
MAPK1	MAPK1	Definite	MAPK1	MINOCYCLINE	inhibitor	DrugBank	11986668
MAPK1	MAPK1	Definite	MAPK1	MITOXANTRONE HYDROCHLORIDE		DTC
MAPK1	MAPK1	Definite	MAPK1	ETOPOSIDE		DTC	23999041
MAPK1	MAPK1	Definite	MAPK1	ISOPROTERENOL	inducer	DrugBank	15292328|20732414|15138589|13679574|15689414|12963636
MAPK1	MAPK1	Definite	MAPK1	DAUNORUBICIN HYDROCHLORIDE		DTC
MAPK1	MAPK1	Definite	MAPK1	MITOXANTRONE		DTC
NGFR	NGFR	Definite	NGFR	CENEGERMIN		TTD
RYR3	RYR3	Definite	RYR3	DANTROLENE SODIUM	antagonist	ChemblInteractions
RYR3	RYR3	Definite	RYR3	DANTROLENE	antagonist	GuideToPharmacologyInteractions
RYR3	RYR3	Definite	RYR3	CAFFEINE	activator	GuideToPharmacologyInteractions
HNRNPL	HNRNPL	Definite	HNRNPL	COPPER		DrugBank	15359738
TSPYL1	TSPYL1	Definite	TSPYL1	ABIRATERONE		PharmGKB
TSPYL1	TSPYL1	Definite	TSPYL1	PREDNISOLONE		PharmGKB
CCND2	CCND2	Definite	CCND2	PALBOCICLIB		CGI
CCND2	CCND2	Definite	CCND2	ABEMACICLIB		ClearityFoundationBiomarkers
CCND2	CCND2	Definite	CCND2	RIBOCICLIB		ClearityFoundationBiomarkers
PIK3R2	PIK3R2	Definite	PIK3R2	ISOPROTERENOL	agonist	DrugBank	15110780|15618457|15985706|15381832|15527548
PIK3R2	PIK3R2	Definite	PIK3R2	CYCLOPHOSPHAMIDE		PharmGKB
PIK3R2	PIK3R2	Definite	PIK3R2	COPANLISIB	inhibitor	MyCancerGenome|ChemblInteractions|MyCancerGenomeClinicalTrial
PIK3R2	PIK3R2	Definite	PIK3R2	EPIRUBICIN		PharmGKB
PIK3R2	PIK3R2	Definite	PIK3R2	ALPELISIB	inhibitor	MyCancerGenome|MyCancerGenomeClinicalTrial
PIK3R2	PIK3R2	Definite	PIK3R2	FLUOROURACIL		PharmGKB
PIK3R2	PIK3R2	Definite	PIK3R2	VEMURAFENIB			24265155
ROCK2	ROCK2	Definite	ROCK2	VANDETANIB		DTC
ROCK2	ROCK2	Definite	ROCK2	PALBOCICLIB		DTC
ROCK2	ROCK2	Definite	ROCK2	PROGESTERONE		NCI	18665217
ROCK2	ROCK2	Definite	ROCK2	NETARSUDIL	inhibitor	DrugBank|GuideToPharmacologyInteractions
ROCK2	ROCK2	Definite	ROCK2	THROMBIN		NCI	16720831
ROCK2	ROCK2	Definite	ROCK2	FOSTAMATINIB	inhibitor	DrugBank	26516587
HIPK3	HIPK3	Definite	HIPK3	FOSTAMATINIB	inhibitor	DrugBank	26516587
FAAH	FAAH	Definite	FAAH	ACETAMINOPHEN	inhibitor	ChemblInteractions|NCI	15987694
FAAH	FAAH	Definite	FAAH	HALOPERIDOL		PharmGKB	20631561
FAAH	FAAH	Definite	FAAH	FOSTAMATINIB	inhibitor	DrugBank	26516587
FAAH	FAAH	Definite	FAAH	IBUPROFEN		PharmGKB	25502615
FAAH	FAAH	Definite	FAAH	QUETIAPINE		PharmGKB	20631561
FAAH	FAAH	Definite	FAAH	CLOZAPINE		PharmGKB	20631561
FAAH	FAAH	Definite	FAAH	PROPOFOL		TTD
FAAH	FAAH	Definite	FAAH	OLANZAPINE		PharmGKB	20631561
FAAH	FAAH	Definite	FAAH	THIOPENTAL	inhibitor	DrugBank|TTD	12839875|11752352
FAAH	FAAH	Definite	FAAH	DRONABINOL		NCI	16886056
FAAH	FAAH	Definite	FAAH	RISPERIDONE		PharmGKB	20631561
FAAH	FAAH	Definite	FAAH	ARIPIPRAZOLE		PharmGKB	20631561
ABL1	ABL1	Definite	ABL1	VANDETANIB		DTC|CGI
ABL1	ABL1	Definite	ABL1	BLINATUMOMAB		PharmGKB|FDA
ABL1	ABL1	Definite	ABL1	OMACETAXINE MEPESUCCINATE		PharmGKB
ABL1	ABL1	Definite	ABL1	HYDROXYUREA		NCI	7923130
ABL1	ABL1	Definite	ABL1	DASATINIB	multitarget|inhibitor	MyCancerGenome|TdgClinicalTrial|DrugBank|ChemblInteractions|TEND|DoCM|CGI|TTD|COSMIC|PharmGKB|JAX-CKB|FDA|OncoKB|GuideToPharmacologyInteractions	14745431|20537386|15256422|26758680|23676790|15705718|19779040|11853795|20697894|16775234|24367893|19466505|25686603|20367437|17701954|25207766|15381060|21895409|18818391|11964322|11752352|24456693|18615627|25157968|14559829|17016423|21562040|21505103|19652056|16772610|12399961
ABL1	ABL1	Definite	ABL1	FOSTAMATINIB	inhibitor	DrugBank	26516587
ABL1	ABL1	Definite	ABL1	PONATINIB	inhibitor	DTC|MyCancerGenome|TdgClinicalTrial|DrugBank|DoCM|CGI|TTD|PharmGKB|JAX-CKB|FDA|OncoKB|GuideToPharmacologyInteractions	20512393|14745431|20537386|11861307|15256422|11423618|20963643|22772060|22306673|23676790|11853795|23190221|22870928|20697894|21872826|12623848|19466505|12130516|20367437|17114651|18828913|24236021|15381060|23540562|21895409|20513156|21489624|23355941|11964322|25349473|24456693|18615627|25157968|23409026|14559829|21605905|21562040|21505103|19652056|15194504|21762985|12399961
ABL1	ABL1	Definite	ABL1	BUSULFAN		PharmGKB|FDA
ABL1	ABL1	Definite	ABL1	NILOTINIB HYDROCHLORIDE MONOHYDRATE	inhibitor	ChemblInteractions
ABL1	ABL1	Definite	ABL1	BRIGATINIB	inhibitor	DrugBank	28597393|23239810
ABL1	ABL1	Definite	ABL1	OXALIPLATIN		NCI	10098743
ABL1	ABL1	Definite	ABL1	SORAFENIB		DTC
ABL1	ABL1	Definite	ABL1	IMATINIB	inhibitor	DTC|MyCancerGenome|TdgClinicalTrial|DrugBank|NCI|TEND|CGI|TTD|COSMIC|PharmGKB|JAX-CKB|FDA|OncoKB|GuideToPharmacologyInteractions	20537386|26758680|16205964|19075254|27125982|15930265|15917650|24367893|12623848|16630177|25686603|25207766|22148584|22371878|15799618|15949566|16153117|12476305|15194504|24681986
ABL1	ABL1	Definite	ABL1	CABOZANTINIB		CGI
ABL1	ABL1	Definite	ABL1	MELPHALAN		NCI	7923130
ABL1	ABL1	Definite	ABL1	PAZOPANIB		DTC
ABL1	ABL1	Definite	ABL1	ERLOTINIB		DTC
ABL1	ABL1	Definite	ABL1	IMATINIB MESYLATE	inhibitor	ChemblInteractions|TTD
ABL1	ABL1	Definite	ABL1	NILOTINIB	inhibitor	MyCancerGenome|TdgClinicalTrial|DrugBank|TEND|DoCM|CGI|TTD|COSMIC|PharmGKB|JAX-CKB|FDA|OncoKB|GuideToPharmacologyInteractions	17715389|20537386|17929114|19075254|23676790|16721371|12623848|25686603|20367437|17114651|18828913|28514312|21895409|21489624|11964322|25157968|21605905|19822896|21562040|19652056|16772610|19920925
ABL1	ABL1	Definite	ABL1	REGORAFENIB	inhibitor	DrugBank|ChemblInteractions
ABL1	ABL1	Definite	ABL1	AZACITIDINE		NCI	2425967
ABL1	ABL1	Definite	ABL1	PONATINIB HYDROCHLORIDE	inhibitor	ChemblInteractions
ABL1	ABL1	Definite	ABL1	CRIZOTINIB		CGI
ABL1	ABL1	Definite	ABL1	VINCRISTINE		PharmGKB|FDA
ABL1	ABL1	Definite	ABL1	AXITINIB		CGI|PharmGKB	25686603
ABL1	ABL1	Definite	ABL1	TRAMETINIB		CGI
ABL1	ABL1	Definite	ABL1	ACYCLOVIR		NCI	8683981
ABL1	ABL1	Definite	ABL1	VENETOCLAX		CGI
ABL1	ABL1	Definite	ABL1	BOSUTINIB	inhibitor	MyCancerGenome|TdgClinicalTrial|DrugBank|ChemblInteractions|DoCM|CGI|TTD|COSMIC|PharmGKB|JAX-CKB|FDA|OncoKB|GuideToPharmacologyInteractions	14745431|15256422|23676790|11853795|20697894|12623848|19466505|20367437|17114651|18828913|15381060|21895409|21489624|11964322|24456693|18615627|25157968|14559829|21605905|21562040|21505103|19652056|12399961
ABL1	ABL1	Definite	ABL1	PROGESTERONE		NCI	10195429
TET2	TET2	Definite	TET2	AZACITIDINE		JAX-CKB	25224413|21494260
TET2	TET2	Definite	TET2	DECITABINE		JAX-CKB	25224413
TET2	TET2	Definite	TET2	HYDROCHLOROTHIAZIDE		PharmGKB
DPYSL2	DPYSL2	Definite	DPYSL2	ARTENIMOL	ligand	DrugBank	26340163
DPYSL2	DPYSL2	Definite	DPYSL2	ERLOSAMIDE		TdgClinicalTrial|TTD
DLG5	DLG5	Definite	DLG5	FLUOROURACIL		PharmGKB
DLG5	DLG5	Definite	DLG5	CAPECITABINE		PharmGKB
XRCC5	XRCC5	Definite	XRCC5	THALIDOMIDE		PharmGKB	21435719
XRCC5	XRCC5	Definite	XRCC5	PHENYLBUTANOIC ACID		NCI	16000590
XRCC5	XRCC5	Definite	XRCC5	CISPLATIN		NCI	15944802
SLK	SLK	Definite	SLK	DASATINIB		DTC
SLK	SLK	Definite	SLK	SORAFENIB		DTC
SLK	SLK	Definite	SLK	FOSTAMATINIB	inhibitor	DrugBank	26516587
SLK	SLK	Definite	SLK	GEFITINIB		DTC
SLK	SLK	Definite	SLK	ERLOTINIB		DTC
DDRGK1	DDRGK1	Definite	DDRGK1	AZATHIOPRINE		PharmGKB	21961091
KCNK6	KCNK6	Definite	KCNK6	QUINIDINE	inhibitor	DrugBank	18582585|10887187
KCNK6	KCNK6	Definite	KCNK6	IBUTILIDE	inhibitor	DrugBank	9257085|15926871
ARHGAP12	ARHGAP12	Definite	ARHGAP12	METHYLPHENIDATE		PharmGKB	29382897
CORO7	CORO7	Definite	CORO7	METHYLPHENIDATE		PharmGKB	29382897
CBL	CBL	Definite	CBL	GILTERITINIB		JAX-CKB	31943762|31309543
CBL	CBL	Definite	CBL	DASATINIB		DoCM|CGI	23696637
CBL	CBL	Definite	CBL	ERLOTINIB		JAX-CKB	25348515
CBL	CBL	Definite	CBL	SORAFENIB		JAX-CKB	31943762|31309543
CBL	CBL	Definite	CBL	GEMCITABINE		JAX-CKB	25348515
CBL	CBL	Definite	CBL	MIDOSTAURIN		JAX-CKB	31943762|31309543
FANCC	FANCC	Definite	FANCC	GEMCITABINE			16243825
FANCC	FANCC	Definite	FANCC	MITOMYCIN			16243825
FANCC	FANCC	Definite	FANCC	CISPLATIN		CGI	16243825
FANCC	FANCC	Definite	FANCC	CHLORAMBUCIL			16243825
FANCC	FANCC	Definite	FANCC	MELPHALAN			16243825
PARP1	PARP1	Definite	PARP1	TALAZOPARIB TOSYLATE	inhibitor	ChemblInteractions
PARP1	PARP1	Definite	PARP1	THEOPHYLLINE		DrugBank	18951874
PARP1	PARP1	Definite	PARP1	NIACINAMIDE	binder	DrugBank|TTD	11752352
PARP1	PARP1	Definite	PARP1	RUCAPARIB CAMSYLATE	inhibitor	ChemblInteractions
PARP1	PARP1	Definite	PARP1	RUCAPARIB	inhibitor|antagonist	TALC|MyCancerGenome|ClearityFoundationClinicalTrial|DrugBank|ChemblInteractions|PharmGKB|GuideToPharmacologyInteractions
PARP1	PARP1	Definite	PARP1	OLAPARIB	inhibitor	DTC|MyCancerGenome|ClearityFoundationClinicalTrial|DrugBank|ChemblInteractions|GuideToPharmacologyInteractions	25981132|26650448|18800822
PARP1	PARP1	Definite	PARP1	TALAZOPARIB	inhibitor	DrugBank|ChemblInteractions|GuideToPharmacologyInteractions	26652717
PARP1	PARP1	Definite	PARP1	NIRAPARIB	antagonist|inhibitor	TALC|MyCancerGenome|TdgClinicalTrial|ClearityFoundationClinicalTrial|DrugBank|ChemblInteractions|GuideToPharmacologyInteractions
PARP1	PARP1	Definite	PARP1	METHYLDOPA		DrugBank	25549802
PLIN3	PLIN3	Definite	PLIN3	GALSULFASE		TdgClinicalTrial|DrugBank	17016423|18709516
PLIN3	PLIN3	Definite	PLIN3	IDURSULFASE		TdgClinicalTrial|DrugBank|TEND	18201153|17139284|17016423|18038146|19707363
XBP1	XBP1	Definite	XBP1	FLUSPIRILENE		DTC
XBP1	XBP1	Definite	XBP1	PIMOZIDE		DTC
EIF4EBP1	EIF4EBP1	Definite	EIF4EBP1	PACLITAXEL		NCI	15897904
ITPA	ITPA	Definite	ITPA	MERCAPTOPURINE		PharmGKB	26237184|18685564|21395650
ITPA	ITPA	Definite	ITPA	METHOTREXATE		PharmGKB	26237184|19858780|27217051|29520081|16947783
ITPA	ITPA	Definite	ITPA	AZATHIOPRINE		PharmGKB	26674571|16431304|21961091|18616518|18662289|15973722|19129747
ITPA	ITPA	Definite	ITPA	RIBAVIRIN		PharmGKB	26441325|25713999|23730840|21274861|26916827|26670100|20173735|26071337|23707372|26438033|21246582|27833958|20547162|21503919|20637204
CALM1	CALM1	Definite	CALM1	LOPERAMIDE	inhibitor	DrugBank	2851449|2836258|2820051|10991984|10949586
CALM1	CALM1	Definite	CALM1	FELODIPINE		DrugBank	2964559|2442519|2933041|3178884|4074665|2833901
CALM1	CALM1	Definite	CALM1	PHENOXYBENZAMINE	inhibitor	DrugBank	9100252|6146911|3134891|3994963|3758070
CALM1	CALM1	Definite	CALM1	DIBUCAINE	inhibitor	DrugBank	6140014|6262771|7680317|8382768
CALM1	CALM1	Definite	CALM1	TRIFLUOPERAZINE	inhibitor	DrugBank	10592235|21129983
CALM1	CALM1	Definite	CALM1	NICARDIPINE		DrugBank	6865927
CALM1	CALM1	Definite	CALM1	CHLORPROMAZINE	inhibitor	DrugBank	2986673
CALM1	CALM1	Definite	CALM1	FLUPHENAZINE	inhibitor	DrugBank	16661928|12366848|1515867|11409178|10516112
CALM1	CALM1	Definite	CALM1	MELATONIN		DrugBank	15229223|19463840
CALM1	CALM1	Definite	CALM1	ISOFLURANE		DrugBank	17229152|15845548|16129978
CALM1	CALM1	Definite	CALM1	BEPRIDIL	binder	DrugBank|TEND	2964559|2933041
CALM1	CALM1	Definite	CALM1	PROMETHAZINE	inhibitor	DrugBank	6433001|6319437|30977998|3022601|6092486|3820316
CALM1	CALM1	Definite	CALM1	NIFEDIPINE	inhibitor	DrugBank	2933041
CALM1	CALM1	Definite	CALM1	PERPHENAZINE	inhibitor	DrugBank	12366848|2885243|11409178|10516112
CALM1	CALM1	Definite	CALM1	PIMOZIDE	inhibitor	DrugBank	2120879|1965307|2386945|3134891|6146939
CALM1	CALM1	Definite	CALM1	CALCIUM		DrugBank	17612522|17537429|17595168|17550897|17592724
CALM1	CALM1	Definite	CALM1	FLUNARIZINE	antagonist	DrugBank|TEND	8471430|21918260|17139284|17016423|7779708
PSME4	PSME4	Definite	PSME4	CARFILZOMIB	inhibitor	MyCancerGenome
PSME4	PSME4	Definite	PSME4	BORTEZOMIB	inhibitor	MyCancerGenome
S1PR3	S1PR3	Definite	S1PR3	SIPONIMOD	agonist	GuideToPharmacologyInteractions
S1PR3	S1PR3	Definite	S1PR3	FINGOLIMOD	modulator	DrugBank	22149256
S1PR3	S1PR3	Definite	S1PR3	FINGOLIMOD HYDROCHLORIDE	agonist	ChemblInteractions
MYC	MYC	Definite	MYC	INDOMETHACIN		NCI	10403534
MYC	MYC	Definite	MYC	SULINDAC		NCI	12414619
MYC	MYC	Definite	MYC	AZACITIDINE		NCI	9006118
MYC	MYC	Definite	MYC	MELATONIN		NCI	7629697
MYC	MYC	Definite	MYC	BROMOCRIPTINE		NCI	11680511
MYC	MYC	Definite	MYC	THYROTROPIN		NCI	3125035|3726540
MYC	MYC	Definite	MYC	ESTRONE		NCI	12520970|12567859
MYC	MYC	Definite	MYC	QUINAPRIL		NCI	9370386
MYC	MYC	Definite	MYC	CISPLATIN			28490518
MYC	MYC	Definite	MYC	VORINOSTAT		NCI	15583844
MYC	MYC	Definite	MYC	METHYLPREDNISOLONE		NCI	9169090
MYC	MYC	Definite	MYC	IMATINIB		NCI	15517875
MYC	MYC	Definite	MYC	OLAPARIB			28490518
MYC	MYC	Definite	MYC	TEMOZOLOMIDE		CGI
MYC	MYC	Definite	MYC	CALCITRIOL		NCI	8490200|15598784
MYC	MYC	Definite	MYC	AMIFOSTINE		NCI	9450496
MYC	MYC	Definite	MYC	VERAPAMIL		NCI	1511424
MYC	MYC	Definite	MYC	CETUXIMAB		NCI	3085922
MYC	MYC	Definite	MYC	THIOGUANINE		NCI	1988936
MYC	MYC	Definite	MYC	GLUTAMINE		NCI	16898871
MYC	MYC	Definite	MYC	THROMBIN		NCI	3023371
SLC29A1	SLC29A1	Definite	SLC29A1	LIDOFLAZINE		TTD
SLC29A1	SLC29A1	Definite	SLC29A1	GEMCITABINE		CGI|PharmGKB	25162786|20665488|22705007|24475233|24361227
SLC29A1	SLC29A1	Definite	SLC29A1	ALCOHOL		DrugBank|NCI	15258586|19298329
SLC29A1	SLC29A1	Definite	SLC29A1	TRIFLURIDINE		PharmGKB	28992563
SLC29A1	SLC29A1	Definite	SLC29A1	FOSTAMATINIB	inhibitor	DrugBank	26516587|16946104
SLC29A1	SLC29A1	Definite	SLC29A1	RIBAVIRIN		PharmGKB	20812847
SLC29A1	SLC29A1	Definite	SLC29A1	DIPYRIDAMOLE	inhibitor	ChemblInteractions|GuideToPharmacologyInteractions
SLC29A1	SLC29A1	Definite	SLC29A1	PACLITAXEL		PharmGKB	24361227
SLC29A1	SLC29A1	Definite	SLC29A1	TICAGRELOR	inhibitor	GuideToPharmacologyInteractions
CSNK1D	CSNK1D	Definite	CSNK1D	GEFITINIB		DTC
SUMO1	SUMO1	Definite	SUMO1	CEFIXIME		DTC
SUMO1	SUMO1	Definite	SUMO1	HEXACHLOROPHENE		DTC
SUMO1	SUMO1	Definite	SUMO1	CEFDINIR		DTC
PRKCI	PRKCI	Definite	PRKCI	MIDOSTAURIN	inhibitor	ChemblInteractions
PRKCI	PRKCI	Definite	PRKCI	FOSTAMATINIB	inhibitor	DrugBank	26516587
FGFR1	FGFR1	Definite	FGFR1	ROMIPLOSTIM		TTD
FGFR1	FGFR1	Definite	FGFR1	ERDAFITINIB	inhibitor	DrugBank|TTD|JAX-CKB|OncoKB|GuideToPharmacologyInteractions	26324363|28965185|28341788
FGFR1	FGFR1	Definite	FGFR1	CISPLATIN		JAX-CKB	23536011
FGFR1	FGFR1	Definite	FGFR1	NINTEDANIB ESYLATE	inhibitor	ChemblInteractions
FGFR1	FGFR1	Definite	FGFR1	DASATINIB		DTC
FGFR1	FGFR1	Definite	FGFR1	ALECTINIB		JAX-CKB	28476735
FGFR1	FGFR1	Definite	FGFR1	GEFITINIB			26936917
FGFR1	FGFR1	Definite	FGFR1	SORAFENIB	inhibitor	DrugBank|PharmGKB|JAX-CKB|GuideToPharmacologyInteractions	25900027|17016424|28362716|15466206|16507829
FGFR1	FGFR1	Definite	FGFR1	VANDETANIB		DTC
FGFR1	FGFR1	Definite	FGFR1	RABEPRAZOLE SODIUM	inhibitor	MyCancerGenome|TTD
FGFR1	FGFR1	Definite	FGFR1	PAZOPANIB	inhibitor	DTC|JAX-CKB|GuideToPharmacologyInteractions	29223982|24302556
FGFR1	FGFR1	Definite	FGFR1	TRAMETINIB		JAX-CKB	27338794|28630215
FGFR1	FGFR1	Definite	FGFR1	DOCETAXEL		JAX-CKB	30807645
FGFR1	FGFR1	Definite	FGFR1	SIROLIMUS		JAX-CKB	26359452
FGFR1	FGFR1	Definite	FGFR1	CARBOPLATIN		JAX-CKB	30807645|31446228
FGFR1	FGFR1	Definite	FGFR1	MIDOSTAURIN		JAX-CKB	15448205
FGFR1	FGFR1	Definite	FGFR1	NINTEDANIB	inhibitor	TALC|MyCancerGenome|TdgClinicalTrial|ClearityFoundationClinicalTrial|DrugBank|TTD|JAX-CKB|GuideToPharmacologyInteractions	22238366|18559524|31016670
FGFR1	FGFR1	Definite	FGFR1	BRIGATINIB		JAX-CKB	29636358
FGFR1	FGFR1	Definite	FGFR1	SUNITINIB	inhibitor	GuideToPharmacologyInteractions
FGFR1	FGFR1	Definite	FGFR1	PACLITAXEL		JAX-CKB	30807645|31446228
FGFR1	FGFR1	Definite	FGFR1	REGORAFENIB	inhibitor	DrugBank|ChemblInteractions|MyCancerGenomeClinicalTrial
FGFR1	FGFR1	Definite	FGFR1	LENVATINIB	inhibitor	TdgClinicalTrial|DrugBank|JAX-CKB	25295214|17943726
FGFR1	FGFR1	Definite	FGFR1	ALPELISIB		JAX-CKB	27126994
FGFR1	FGFR1	Definite	FGFR1	FINASTERIDE		NCI	10386468
FGFR1	FGFR1	Definite	FGFR1	ALCOHOL		NCI	16478533
FGFR1	FGFR1	Definite	FGFR1	PALIFERMIN		TdgClinicalTrial|DrugBank	10212269|9890894|11714710|10950949|11091737
FGFR1	FGFR1	Definite	FGFR1	PONATINIB	inhibitor	TALC|MyCancerGenome|DrugBank|JAX-CKB	22238366|23563700|26175911|26179511|24771645|23468082
FGFR1	FGFR1	Definite	FGFR1	PAZOPANIB HYDROCHLORIDE	inhibitor	ChemblInteractions
FGFR1	FGFR1	Definite	FGFR1	FOSTAMATINIB	inhibitor	DrugBank	26516587
FGFR1	FGFR1	Definite	FGFR1	ETOPOSIDE		JAX-CKB	23536011
FGFR1	FGFR1	Definite	FGFR1	CRIZOTINIB		JAX-CKB	28476735
P4HB	P4HB	Definite	P4HB	COPPER		DrugBank	14534351|15359738
P4HB	P4HB	Definite	P4HB	RALOXIFENE HYDROCHLORIDE		DTC
P4HB	P4HB	Definite	P4HB	METHYLDOPA		DrugBank	14534351
P4HB	P4HB	Definite	P4HB	ARTENIMOL	ligand	DrugBank	26340163
P4HB	P4HB	Definite	P4HB	LOMITAPIDE MESYLATE	inhibitor	ChemblInteractions
CSNK1A1	CSNK1A1	Definite	CSNK1A1	FOSTAMATINIB	inhibitor	DrugBank	26516587
CREB1	CREB1	Definite	CREB1	NALOXONE		DrugBank	12969258|15953421|12956944|14653953|16417577
CREB1	CREB1	Definite	CREB1	CITALOPRAM		PharmGKB	20643483|17548750
CREB1	CREB1	Definite	CREB1	ALCOHOL		NCI	11181917
CREB1	CREB1	Definite	CREB1	NICOTINE		NCI	11331423
B4GALNT1	B4GALNT1	Definite	B4GALNT1	DINUTUXIMAB	antibody	MyCancerGenome
PKN2	PKN2	Definite	PKN2	DASATINIB		DTC
PKN2	PKN2	Definite	PKN2	FOSTAMATINIB	inhibitor	DrugBank	26516587
PKN2	PKN2	Definite	PKN2	ERLOTINIB		DTC
PDE7A	PDE7A	Definite	PDE7A	DYPHYLLINE	inhibitor	TdgClinicalTrial|TEND	17139284|17016423
PDE7A	PDE7A	Definite	PDE7A	CRISABOROLE	inhibitor	GuideToPharmacologyInteractions
PDE7A	PDE7A	Definite	PDE7A	PENTOXIFYLLINE	inhibitor	ChemblInteractions
PDE7A	PDE7A	Definite	PDE7A	FLAVOXATE HYDROCHLORIDE	inhibitor	ChemblInteractions
PDE7A	PDE7A	Definite	PDE7A	DIPYRIDAMOLE	inhibitor	ChemblInteractions
SREBF1	SREBF1	Definite	SREBF1	FISH OIL TRIGLYCERIDES	modulator	DrugBank	28760435
SREBF1	SREBF1	Definite	SREBF1	INSULIN		NCI	10627507|12576518|14594997
SREBF1	SREBF1	Definite	SREBF1	FLUVASTATIN		PharmGKB
CCS	CCS	Definite	CCS	METHYLDOPA		DrugBank	15736924
ADO	ADO	Definite	ADO	HYDROCHLOROTHIAZIDE		PharmGKB	31327267
GPRC5A	GPRC5A	Definite	GPRC5A	TRETINOIN		DrugBank	15677768|15086536
KHSRP	KHSRP	Definite	KHSRP	ARTENIMOL	ligand	DrugBank	26340163
NDUFA7	NDUFA7	Definite	NDUFA7	METFORMIN HYDROCHLORIDE	inhibitor	ChemblInteractions
PTAFR	PTAFR	Definite	PTAFR	TICLOPIDINE		TTD
KCNJ6	KCNJ6	Definite	KCNJ6	MORPHINE		PharmGKB	27027462
KCNJ6	KCNJ6	Definite	KCNJ6	METHADONE		PharmGKB	20220551
KCNJ6	KCNJ6	Definite	KCNJ6	HALOTHANE	inhibitor	DrugBank	16243998|15175324
KCNJ6	KCNJ6	Definite	KCNJ6	FENTANYL		PharmGKB
KCNJ6	KCNJ6	Definite	KCNJ6	ISAVUCONAZOLE	inhibitor	DrugBank	28074556
KCNJ6	KCNJ6	Definite	KCNJ6	ALCOHOL		DrugBank	24145411|19342616
FDX1	FDX1	Definite	FDX1	MITOTANE		DrugBank	3770229|9118466|11159707
NDUFA5	NDUFA5	Definite	NDUFA5	METFORMIN HYDROCHLORIDE	inhibitor	ChemblInteractions
IL7R	IL7R	Definite	IL7R	RUXOLITINIB		CGI	22897847|22955920
TCF7L2	TCF7L2	Definite	TCF7L2	REPAGLINIDE		PharmGKB	20054294
TCF7L2	TCF7L2	Definite	TCF7L2	HYDROCHLOROTHIAZIDE		PharmGKB
TCF7L2	TCF7L2	Definite	TCF7L2	TACROLIMUS		PharmGKB	23041303|21857094
TCF7L2	TCF7L2	Definite	TCF7L2	SIROLIMUS		PharmGKB	23041303|21857094
TCF7L2	TCF7L2	Definite	TCF7L2	CYCLOSPORINE		PharmGKB	23041303|21857094
ENPP1	ENPP1	Definite	ENPP1	RIBAVIRIN	inhibitor		17139284|17016423
ENPP1	ENPP1	Definite	ENPP1	AMIFOSTINE	inducer		17139284|17016423
VIM	VIM	Definite	VIM	ARTENIMOL	ligand	DrugBank	26340163
CHD4	CHD4	Definite	CHD4	VORINOSTAT		PharmGKB	26296641
GLP2R	GLP2R	Definite	GLP2R	TEDUGLUTIDE	agonist	DrugBank|ChemblInteractions|TTD|GuideToPharmacologyInteractions	23729002
GLP2R	GLP2R	Definite	GLP2R	GLUCAGON	agonist	DrugBank	11212269|15817468|9990065|17139284|17016423|12529935
NEK3	NEK3	Definite	NEK3	FOSTAMATINIB	inhibitor	DrugBank	26516587
PGRMC1	PGRMC1	Definite	PGRMC1	NORTRIPTYLINE	binder	DrugBank
PGRMC1	PGRMC1	Definite	PGRMC1	SERTRALINE	binder|inhibitor	DrugBank	8831113|20438757
PGRMC1	PGRMC1	Definite	PGRMC1	DEXTROMETHORPHAN	binder	DrugBank	10064839
ETV6	ETV6	Definite	ETV6	NILOTINIB		JAX-CKB	32279331|24053143
ETV6	ETV6	Definite	ETV6	MIDOSTAURIN		JAX-CKB	23131561
ETV6	ETV6	Definite	ETV6	IMATINIB		JAX-CKB	17555450|24053143
ETV6	ETV6	Definite	ETV6	ASPARAGINASE		NCI	15837750
ETV6	ETV6	Definite	ETV6	COPANLISIB		JAX-CKB	31952221
ETV6	ETV6	Definite	ETV6	DASATINIB		JAX-CKB	32279331
ETV6	ETV6	Definite	ETV6	CRIZOTINIB		JAX-CKB	26884591|23811600
ETV6	ETV6	Definite	ETV6	IDARUBICIN		NCI	14501384
ETV6	ETV6	Definite	ETV6	LAROTRECTINIB		JAX-CKB	28578312|31905241|29606586|29466156|26216294|29920189|27093299
FUS	FUS	Definite	FUS	TRETINOIN		NCI	10691862
STX4	STX4	Definite	STX4	PHENPROCOUMON		PharmGKB	21063236
STX4	STX4	Definite	STX4	WARFARIN		PharmGKB
HM13	HM13	Definite	HM13	THEOPHYLLINE		DrugBank	18951874
CYB5R3	CYB5R3	Definite	CYB5R3	CHLOROPROCAINE		PharmGKB
CYB5R3	CYB5R3	Definite	CYB5R3	MEPIVACAINE		PharmGKB
CYB5R3	CYB5R3	Definite	CYB5R3	RASBURICASE		PharmGKB
CYB5R3	CYB5R3	Definite	CYB5R3	COPPER		DrugBank	15359738
CYB5R3	CYB5R3	Definite	CYB5R3	CEFTRIAXONE		PharmGKB
CYB5R3	CYB5R3	Definite	CYB5R3	DAPSONE		PharmGKB
CYB5R3	CYB5R3	Definite	CYB5R3	PRIMAQUINE		PharmGKB	25058800
CYB5R3	CYB5R3	Definite	CYB5R3	ROPIVACAINE		PharmGKB
CYB5R3	CYB5R3	Definite	CYB5R3	METOCLOPRAMIDE		PharmGKB	11418378
NF1	NF1	Definite	NF1	VEMURAFENIB		CGI	23288408|231718
NF1	NF1	Definite	NF1	BEVACIZUMAB		CGI	24232489|2485933
NF1	NF1	Definite	NF1	IMATINIB		CGI
NF1	NF1	Definite	NF1	DASATINIB		CGI
NF1	NF1	Definite	NF1	EVEROLIMUS		CGI	26859683|11010|2016|17557|2015
NF1	NF1	Definite	NF1	PAZOPANIB		CGI
NF1	NF1	Definite	NF1	SIROLIMUS		CGI	23171796
NF1	NF1	Definite	NF1	COBIMETINIB		ClearityFoundationBiomarkers|OncoKB
NF1	NF1	Definite	NF1	ERLOTINIB		CGI
NF1	NF1	Definite	NF1	NILOTINIB		CGI
NF1	NF1	Definite	NF1	BINIMETINIB		ClearityFoundationBiomarkers
NF1	NF1	Definite	NF1	SORAFENIB		CGI
NF1	NF1	Definite	NF1	TRAMETINIB		ClearityFoundationBiomarkers|CGI|OncoKB	24576830|2524381
NF1	NF1	Definite	NF1	VINBLASTINE		CGI
NF1	NF1	Definite	NF1	PEXIDARTINIB		CGI
NF1	NF1	Definite	NF1	TAMOXIFEN		CGI
STK17B	STK17B	Definite	STK17B	FOSTAMATINIB	inhibitor	DrugBank	26516587
NCOR2	NCOR2	Definite	NCOR2	BENZBROMARONE		DTC
SOD2	SOD2	Definite	SOD2	PACLITAXEL		PharmGKB	25495407
SOD2	SOD2	Definite	SOD2	METHOTREXATE		PharmGKB	25330300
SOD2	SOD2	Definite	SOD2	CYCLOPHOSPHAMIDE		PharmGKB
SOD2	SOD2	Definite	SOD2	ASPARAGINASE		PharmGKB	27019981
SOD2	SOD2	Definite	SOD2	DIACETYLMORPHINE		PharmGKB	29459008
CROT	CROT	Definite	CROT	LEVOCARNITINE		DrugBank	16681386|15155769
NPEPPS	NPEPPS	Definite	NPEPPS	ARTENIMOL	ligand	DrugBank	26340163
SLC22A3	SLC22A3	Definite	SLC22A3	LAMIVUDINE		PharmGKB
SLC22A3	SLC22A3	Definite	SLC22A3	METFORMIN		PharmGKB	25920679|20859243|22722338
PTGR2	PTGR2	Definite	PTGR2	INDOMETHACIN	inhibitor	DrugBank	19000823
KMT2A	KMT2A	Definite	KMT2A	TOPOTECAN HYDROCHLORIDE		DTC
KMT2A	KMT2A	Definite	KMT2A	DAUNORUBICIN HYDROCHLORIDE		DTC
KMT2A	KMT2A	Definite	KMT2A	TRYPAN BLUE		DTC
KMT2A	KMT2A	Definite	KMT2A	TANNIC ACID		DTC
KMT2A	KMT2A	Definite	KMT2A	CYTARABINE		JAX-CKB	27443263
KMT2A	KMT2A	Definite	KMT2A	TRIMETREXATE		DTC
KMT2A	KMT2A	Definite	KMT2A	DAUNORUBICIN		CGI
KMT2A	KMT2A	Definite	KMT2A	METHYLENE BLUE		DTC
KMT2A	KMT2A	Definite	KMT2A	ROMIDEPSIN		JAX-CKB	27443263
KMT2A	KMT2A	Definite	KMT2A	DOXORUBICIN		JAX-CKB	26552700
KMT2A	KMT2A	Definite	KMT2A	CHLORHEXIDINE HYDROCHLORIDE		DTC
KMT2A	KMT2A	Definite	KMT2A	PANOBINOSTAT		JAX-CKB	27443263
KMT2A	KMT2A	Definite	KMT2A	PLERIXAFOR		DTC
KMT2A	KMT2A	Definite	KMT2A	OLSALAZINE		DTC
KMT2A	KMT2A	Definite	KMT2A	BELINOSTAT		CGI	351975|22015773|357032
AURKA	AURKA	Definite	AURKA	CISPLATIN			25924824|25082261
AURKA	AURKA	Definite	AURKA	FOSTAMATINIB	inhibitor	DrugBank	26516587
AURKA	AURKA	Definite	AURKA	PACLITAXEL			12559175
AURKA	AURKA	Definite	AURKA	PAZOPANIB		DTC
AURKA	AURKA	Definite	AURKA	FLUOROURACIL			25924824
AURKA	AURKA	Definite	AURKA	SORAFENIB		DTC
DLG4	DLG4	Definite	DLG4	HALOPERIDOL		NCI	11834303
DLG4	DLG4	Definite	DLG4	LEVODOPA		NCI	15703272
DLG4	DLG4	Definite	DLG4	GUANIDINE		DrugBank	10592235|17139284|17016423
SLC12A5	SLC12A5	Definite	SLC12A5	BUMETANIDE	inhibitor	TdgClinicalTrial|DrugBank|TEND	10793196
NISCH	NISCH	Definite	NISCH	TIZANIDINE	agonist	DrugBank	26962521|18602099|893017
NISCH	NISCH	Definite	NISCH	MOXONIDINE	agonist	DrugBank	8380858|7791087
EIF4G1	EIF4G1	Definite	EIF4G1	INSULIN		NCI	8521827
TUBB4B	TUBB4B	Definite	TUBB4B	PACLITAXEL	inhibitor	DTC|ChemblInteractions	23631389|25369367|25768699|24457094|22595423|23313639|17887662|23387901|19758808|23725535|24953821
TUBB4B	TUBB4B	Definite	TUBB4B	PODOFILOX		DTC	17765552|24953821|21402478
TUBB4B	TUBB4B	Definite	TUBB4B	VINCRISTINE		DTC	16539377|21664138|23916255
TUBB4B	TUBB4B	Definite	TUBB4B	CABAZITAXEL	inhibitor	ChemblInteractions
TUBB4B	TUBB4B	Definite	TUBB4B	VORINOSTAT		DTC	20491440
TUBB4B	TUBB4B	Definite	TUBB4B	ALBENDAZOLE	inhibitor	DrugBank	19846910|11980387|10592235
TUBB4B	TUBB4B	Definite	TUBB4B	COLCHICINE	inhibitor	DTC|ChemblInteractions	23750455|25805446|24502232|25061803|25937236|24773591|25938266
TUBB4B	TUBB4B	Definite	TUBB4B	VINBLASTINE SULFATE	inhibitor	ChemblInteractions
TUBB4B	TUBB4B	Definite	TUBB4B	VINFLUNINE	inhibitor	ChemblInteractions
TUBB4B	TUBB4B	Definite	TUBB4B	BRENTUXIMAB VEDOTIN	inhibitor	ChemblInteractions
TUBB4B	TUBB4B	Definite	TUBB4B	VINORELBINE		DTC	25768699
TUBB4B	TUBB4B	Definite	TUBB4B	TRASTUZUMAB EMTANSINE	inhibitor	ChemblInteractions
TUBB4B	TUBB4B	Definite	TUBB4B	VINCRISTINE SULFATE	inhibitor	ChemblInteractions
TUBB4B	TUBB4B	Definite	TUBB4B	VINBLASTINE		DTC|TTD	23708010|23916255
TUBB4B	TUBB4B	Definite	TUBB4B	ERIBULIN MESYLATE	inhibitor	ChemblInteractions
TUBB4B	TUBB4B	Definite	TUBB4B	IXABEPILONE	inhibitor	ChemblInteractions
TUBB4B	TUBB4B	Definite	TUBB4B	MEBENDAZOLE	inhibitor	TdgClinicalTrial|DrugBank	15500920|11444621|8139621|10592235|17662615|12099434
TUBB4B	TUBB4B	Definite	TUBB4B	VINORELBINE TARTRATE	inhibitor	ChemblInteractions
TUBB4B	TUBB4B	Definite	TUBB4B	DOCETAXEL	inhibitor	ChemblInteractions
PMP22	PMP22	Definite	PMP22	KETOPROFEN		DTC
PMP22	PMP22	Definite	PMP22	PROGESTERONE		NCI	9751213
BIRC5	BIRC5	Definite	BIRC5	EPOETIN ALFA		NCI	17112829
BIRC5	BIRC5	Definite	BIRC5	DOCETAXEL		ClearityFoundationBiomarkers
BIRC5	BIRC5	Definite	BIRC5	OPRELVEKIN		NCI	14734714
BIRC5	BIRC5	Definite	BIRC5	EPIRUBICIN		NCI	16608080
BIRC5	BIRC5	Definite	BIRC5	TRETINOIN		NCI	14587026|16403261
BIRC5	BIRC5	Definite	BIRC5	PLICAMYCIN		NCI	17124180
BIRC5	BIRC5	Definite	BIRC5	IRINOTECAN HYDROCHLORIDE		NCI	15956246
BIRC5	BIRC5	Definite	BIRC5	PACLITAXEL		ClearityFoundationBiomarkers|NCI	16211241|15347474
BIRC5	BIRC5	Definite	BIRC5	OMACETAXINE MEPESUCCINATE		NCI	15854289
BIRC5	BIRC5	Definite	BIRC5	IMATINIB		NCI	16254145
BIRC5	BIRC5	Definite	BIRC5	DOXORUBICIN		NCI	16211302
BIRC5	BIRC5	Definite	BIRC5	SULINDAC		NCI	16707021|16950207
BIRC5	BIRC5	Definite	BIRC5	ERLOTINIB		NCI	17047074
BIRC5	BIRC5	Definite	BIRC5	DEXAMETHASONE		NCI	16787583
BIRC5	BIRC5	Definite	BIRC5	FLUTAMIDE		NCI	15735703
BIRC5	BIRC5	Definite	BIRC5	LAPATINIB		NCI	16452223
BIRC5	BIRC5	Definite	BIRC5	VORINOSTAT		NCI	16951239
BIRC5	BIRC5	Definite	BIRC5	FLUOROURACIL		NCI	15067352
BIRC5	BIRC5	Definite	BIRC5	CALCITONIN		NCI	16222118
BIRC5	BIRC5	Definite	BIRC5	PRASTERONE		NCI	16461558
BIRC5	BIRC5	Definite	BIRC5	TRASTUZUMAB		NCI	16452223|23204226
BIRC5	BIRC5	Definite	BIRC5	INDOMETHACIN		NCI	17270149
BIRC5	BIRC5	Definite	BIRC5	METHOTREXATE		NCI	15670151
BIRC5	BIRC5	Definite	BIRC5	CARBOPLATIN		NCI	15347474
BIRC5	BIRC5	Definite	BIRC5	ROMIDEPSIN		NCI	14767553
CCKBR	CCKBR	Definite	CCKBR	DIAZEPAM		NCI	1679211
CCKBR	CCKBR	Definite	CCKBR	PENTAGASTRIN	agonist	TdgClinicalTrial|DrugBank|TEND|TTD	3004700|7491961|1732532|15157745|11752352|12073167
CCKBR	CCKBR	Definite	CCKBR	CLOZAPINE		PharmGKB	20732371
CCKBR	CCKBR	Definite	CCKBR	CERULETIDE		TTD
CCKBR	CCKBR	Definite	CCKBR	SINCALIDE	agonist	DrugBank|TTD|GuideToPharmacologyInteractions
CCKBR	CCKBR	Definite	CCKBR	MORPHINE		NCI	8771563
CCKBR	CCKBR	Definite	CCKBR	OLANZAPINE		PharmGKB	20732371
TGFBR1	TGFBR1	Definite	TGFBR1	FOSTAMATINIB	inhibitor	DrugBank	26516587
A2M	A2M	Definite	A2M	BECAPLERMIN		DrugBank	7541796|1697862
A2M	A2M	Definite	A2M	OCRIPLASMIN	ligand	DrugBank
A2M	A2M	Definite	A2M	CISPLATIN		DrugBank	16773208
A2M	A2M	Definite	A2M	METHYLDOPA		DrugBank	23896426
A2M	A2M	Definite	A2M	THROMBIN		NCI	2432677
A2M	A2M	Definite	A2M	BACITRACIN	inhibitor	DrugBank	6165617|6187372|42903|6184373|6162847
PRKD3	PRKD3	Definite	PRKD3	GEFITINIB		DTC
PRKD3	PRKD3	Definite	PRKD3	PALBOCICLIB		DTC
PRKD3	PRKD3	Definite	PRKD3	MIDOSTAURIN	inhibitor	ChemblInteractions
SCO1	SCO1	Definite	SCO1	COPPER		DrugBank	16735468
PPP3CA	PPP3CA	Definite	PPP3CA	PIMECROLIMUS		TTD
PPP3CA	PPP3CA	Definite	PPP3CA	TACROLIMUS		TTD
PPP3CA	PPP3CA	Definite	PPP3CA	CYCLOSPORINE		TTD
SMARCA4	SMARCA4	Definite	SMARCA4	CISPLATIN			26671993
SMARCA4	SMARCA4	Definite	SMARCA4	VINORELBINE			26671993
CRMP1	CRMP1	Definite	CRMP1	METHIMAZOLE		NCI	11694350
SOAT1	SOAT1	Definite	SOAT1	LOVASTATIN		NCI	2268271
SOAT1	SOAT1	Definite	SOAT1	EZETIMIBE	inhibitor	DrugBank	18442485|20227438|19669185
SOAT1	SOAT1	Definite	SOAT1	DEXAMETHASONE		NCI	7485476
SOAT1	SOAT1	Definite	SOAT1	NIFEDIPINE		NCI	3341992|2829803
SOAT1	SOAT1	Definite	SOAT1	ATORVASTATIN		NCI	14644397
SOAT1	SOAT1	Definite	SOAT1	TESTOSTERONE		NCI	2765620
WEE1	WEE1	Definite	WEE1	GEMCITABINE			26057002
WEE1	WEE1	Definite	WEE1	FOSTAMATINIB	inhibitor	DrugBank	26516587
CANX	CANX	Definite	CANX	TENECTEPLASE		DrugBank	9359841
HSP90B1	HSP90B1	Definite	HSP90B1	COPPER		DrugBank	14534351
HSP90B1	HSP90B1	Definite	HSP90B1	RIFABUTIN		DrugBank	9428803|8617772|14660597
ATP2B1	ATP2B1	Definite	ATP2B1	HALOTHANE	inhibitor	DrugBank	10814537|7499320
DCN	DCN	Definite	DCN	SIROLIMUS		NCI	17200203
DCN	DCN	Definite	DCN	TROMETHAMINE			10592235|17139284|17016423
ULK1	ULK1	Definite	ULK1	FOSTAMATINIB	inhibitor	DrugBank	26516587
KIF6	KIF6	Definite	KIF6	ATORVASTATIN		PharmGKB	20403483|18222353|18222355|20215968|30304062
KIF6	KIF6	Definite	KIF6	PRAVASTATIN		PharmGKB	20403483|18222353|18222355|20215968
KIF6	KIF6	Definite	KIF6	ROSUVASTATIN		PharmGKB	30304062
KIF6	KIF6	Definite	KIF6	SIMVASTATIN		PharmGKB	21458191|30304062
PLK1	PLK1	Definite	PLK1	HEXACHLOROPHENE		DTC
PLK1	PLK1	Definite	PLK1	TOPOTECAN HYDROCHLORIDE		DTC
PLK1	PLK1	Definite	PLK1	DIPYRIDAMOLE		DTC
PLK1	PLK1	Definite	PLK1	ACRIFLAVINE		DTC
PLK1	PLK1	Definite	PLK1	BENZBROMARONE		DTC
PLK1	PLK1	Definite	PLK1	SIMVASTATIN		DTC
PLK1	PLK1	Definite	PLK1	FOSTAMATINIB	inhibitor	DrugBank	26516587
PLK1	PLK1	Definite	PLK1	OXYTETRACYCLINE		DTC
PLK1	PLK1	Definite	PLK1	ACITRETIN		DTC
PLK1	PLK1	Definite	PLK1	LANSOPRAZOLE		DTC
PLK1	PLK1	Definite	PLK1	STAVUDINE		DTC
PLK1	PLK1	Definite	PLK1	THIMEROSAL		DTC
PLK1	PLK1	Definite	PLK1	IDARUBICIN HYDROCHLORIDE		DTC
PLK1	PLK1	Definite	PLK1	INAMRINONE		DTC
PLK1	PLK1	Definite	PLK1	CEFACLOR		DTC
PLK1	PLK1	Definite	PLK1	DISULFIRAM		DTC
PLK1	PLK1	Definite	PLK1	ERYTHROMYCIN		DTC
PLK1	PLK1	Definite	PLK1	OMEPRAZOLE		DTC
PLK1	PLK1	Definite	PLK1	HYDROXYZINE PAMOATE		DTC
PLCE1	PLCE1	Definite	PLCE1	HYDROCHLOROTHIAZIDE		PharmGKB	31327267
POLR2A	POLR2A	Definite	POLR2A	GEMCITABINE		PharmGKB
JAK2	JAK2	Definite	JAK2	TOFACITINIB CITRATE	inhibitor	ChemblInteractions
JAK2	JAK2	Definite	JAK2	ERLOTINIB		DTC
JAK2	JAK2	Definite	JAK2	RUXOLITINIB	inhibitor	DTC|MyCancerGenome|DrugBank|DoCM|CGI|TTD|MyCancerGenomeClinicalTrial|JAX-CKB|OncoKB|GuideToPharmacologyInteractions	18805579|16293597|24398328|20339092|21926964|22829971|15781101|16081687|22271575|26258521|22955920|20631743|25207766|19287384|20585391|21120162|22041374|16709929|24251790|23061804|22875628|19470474|18394554|21689158|23115274|21393331|23514013|22368270|25157968|22818858|31697804|24986690|24404189|22422826|26419724|26472029|29025600|22899477|22571758
JAK2	JAK2	Definite	JAK2	TRIAMTERENE		DTC
JAK2	JAK2	Definite	JAK2	PEMBROLIZUMAB		COSMIC|JAX-CKB	27433843
JAK2	JAK2	Definite	JAK2	DASATINIB		DTC
JAK2	JAK2	Definite	JAK2	TOFACITINIB	antagonist|inhibitor	DTC|DrugBank|GuideToPharmacologyInteractions	26258521|10592235
JAK2	JAK2	Definite	JAK2	PACLITAXEL		JAX-CKB	27075627
JAK2	JAK2	Definite	JAK2	BARICITINIB	inhibitor	DrugBank|ChemblInteractions|TTD|GuideToPharmacologyInteractions	27028914|28255337
JAK2	JAK2	Definite	JAK2	RUXOLITINIB PHOSPHATE	inhibitor	ChemblInteractions
JAK2	JAK2	Definite	JAK2	IMATINIB		JAX-CKB	21224473
JAK2	JAK2	Definite	JAK2	FOSTAMATINIB	inhibitor	DrugBank	26516587
IFNGR2	IFNGR2	Definite	IFNGR2	INTERFERON GAMMA-1B	binder|agonist	TdgClinicalTrial|DrugBank|ChemblInteractions	17618444|17239631|11752352
GLUL	GLUL	Definite	GLUL	GLUTAMINE	product of	DrugBank	16382338|16326016|16547651|16530878|16484281
WT1	WT1	Definite	WT1	DEFEROXAMINE		NCI	12738801
WT1	WT1	Definite	WT1	DIMETHYL SULFOXIDE		NCI	9040935
WT1	WT1	Definite	WT1	CYTARABINE			18591546
WT1	WT1	Definite	WT1	DAUNORUBICIN			18591546
WT1	WT1	Definite	WT1	SIROLIMUS		NCI	15782132
CDK12	CDK12	Definite	CDK12	CEMIPLIMAB		OncoKB
CDK12	CDK12	Definite	CDK12	NIVOLUMAB		OncoKB
CDK12	CDK12	Definite	CDK12	PEMBROLIZUMAB		OncoKB
CDK12	CDK12	Definite	CDK12	OLAPARIB			24240700
UBE2D1	UBE2D1	Definite	UBE2D1	DEFEROXAMINE		NCI	9694900
ACACA	ACACA	Definite	ACACA	BIOTIN	cofactor	DrugBank	17468269|16636450|16772434|16545081|16460018|16707089
NUCB2	NUCB2	Definite	NUCB2	HYDROCHLOROTHIAZIDE		PharmGKB	31327267
CDK2	CDK2	Definite	CDK2	ACETAMINOPHEN		NCI	14644624
CDK2	CDK2	Definite	CDK2	BOSUTINIB	inhibitor	DrugBank	19039322
CDK2	CDK2	Definite	CDK2	PACLITAXEL		NCI	16020661
CDK2	CDK2	Definite	CDK2	LOVASTATIN		NCI	9553123
CDK2	CDK2	Definite	CDK2	DEXAMETHASONE		NCI	10867026
CDK2	CDK2	Definite	CDK2	RALTITREXED		NCI	10047461
MYLK3	MYLK3	Definite	MYLK3	FOSTAMATINIB	inhibitor	DrugBank	26516587
GNAQ	GNAQ	Definite	GNAQ	VERTEPORFIN		JAX-CKB	27308390
GNAQ	GNAQ	Definite	GNAQ	DACARBAZINE		JAX-CKB	29528792
GNAQ	GNAQ	Definite	GNAQ	TRAMETINIB		JAX-CKB	22805292|22733540
GNAQ	GNAQ	Definite	GNAQ	EVEROLIMUS		JAX-CKB	27507190
GNAQ	GNAQ	Definite	GNAQ	BINIMETINIB		JAX-CKB	27507190
CYCS	CYCS	Definite	CYCS	MINOCYCLINE	negative modulator	DrugBank	11986668|16469440|15665864|17067803|18977395|14680842
CYCS	CYCS	Definite	CYCS	ARTENIMOL	ligand	DrugBank	26340163
TLE3	TLE3	Definite	TLE3	DOCETAXEL		ClearityFoundationBiomarkers
TLE3	TLE3	Definite	TLE3	PACLITAXEL		ClearityFoundationBiomarkers
RIOK3	RIOK3	Definite	RIOK3	FOSTAMATINIB	inhibitor	DrugBank	26516587
IDS	IDS	Definite	IDS	IDURSULFASE		TTD
PDCD4	PDCD4	Definite	PDCD4	PACLITAXEL			25928036
EIF4A1	EIF4A1	Definite	EIF4A1	COPPER		DrugBank	15359738
POMC	POMC	Definite	POMC	LOPERAMIDE	modulator	DrugBank	2545766|2832297|2855105|11474216|1322429
AKAP13	AKAP13	Definite	AKAP13	HALOPERIDOL		PharmGKB	27023437
SLC6A5	SLC6A5	Definite	SLC6A5	GLYCINE			16884688
SLC6A5	SLC6A5	Definite	SLC6A5	HALOPERIDOL		PharmGKB	27023437|20859245
SLC7A11	SLC7A11	Definite	SLC7A11	SULFASALAZINE	inhibitor	DrugBank	11752352|11587223
SLC7A11	SLC7A11	Definite	SLC7A11	CYSTINE		DrugBank	12065721|12498985|12898700|16014042|11867597
SLC7A11	SLC7A11	Definite	SLC7A11	THIMEROSAL	antagonist	DrugBank
SLC7A11	SLC7A11	Definite	SLC7A11	ACETYLCYSTEINE	activator	DrugBank	21118657
SLC7A11	SLC7A11	Definite	SLC7A11	RILUZOLE	inducer	TdgClinicalTrial|DrugBank	10899284|20226190|12629173|20059984|8813989
FASN	FASN	Definite	FASN	LIOTHYRONINE SODIUM		NCI	9770474
FASN	FASN	Definite	FASN	CLOZAPINE		NCI	17052361
FASN	FASN	Definite	FASN	HEXACHLOROPHENE		DTC
FASN	FASN	Definite	FASN	PACLITAXEL		NCI	15657900
FASN	FASN	Definite	FASN	ORLISTAT	inhibitor	TdgClinicalTrial|DrugBank	16749788|15138278|15870086|11752352|16091048|15026345
FASN	FASN	Definite	FASN	RISPERIDONE		NCI	17052361
STAT3	STAT3	Definite	STAT3	PYRIMETHAMINE		DTC	25984755
STAT3	STAT3	Definite	STAT3	DIGITOXIN		DTC
STAT3	STAT3	Definite	STAT3	NICLOSAMIDE		DTC
STAT3	STAT3	Definite	STAT3	DIGOXIN		DTC
STAT3	STAT3	Definite	STAT3	ACITRETIN		TTD
STAT3	STAT3	Definite	STAT3	OUABAIN		DTC
CTSD	CTSD	Definite	CTSD	STREPTOZOCIN		NCI	3282952
MAFK	MAFK	Definite	MAFK	ISONIAZID		PharmGKB	22341855|29036176
IGF1R	IGF1R	Definite	IGF1R	RALOXIFENE		NCI	14533013
IGF1R	IGF1R	Definite	IGF1R	MECASERMIN RINFABATE	agonist	ChemblInteractions
IGF1R	IGF1R	Definite	IGF1R	PAZOPANIB		DTC
IGF1R	IGF1R	Definite	IGF1R	THROMBIN		NCI	7499260|11375274
IGF1R	IGF1R	Definite	IGF1R	ERLOTINIB		CGI
IGF1R	IGF1R	Definite	IGF1R	BRIGATINIB	inhibitor	DrugBank|GuideToPharmacologyInteractions	28597393|23239810
IGF1R	IGF1R	Definite	IGF1R	MECASERMIN	agonist	TdgClinicalTrial|DrugBank|ChemblInteractions|TEND|TTD|GuideToPharmacologyInteractions	19198769
IGF1R	IGF1R	Definite	IGF1R	CERITINIB	inhibitor	DTC|GuideToPharmacologyInteractions	23837797
IGF1R	IGF1R	Definite	IGF1R	SOMATREM		DrugBank
IGF1R	IGF1R	Definite	IGF1R	ACETYLCYSTEINE		NCI	12485928
EPHB4	EPHB4	Definite	EPHB4	VANDETANIB	inhibitor	ChemblInteractions
EPHB4	EPHB4	Definite	EPHB4	DASATINIB		DrugBank	18180381
EPHB4	EPHB4	Definite	EPHB4	FOSTAMATINIB	inhibitor	DrugBank	26516587
UGDH	UGDH	Definite	UGDH	COPPER		DrugBank	15359738
TOP2A	TOP2A	Definite	TOP2A	PEFLOXACIN	inhibitor	DrugBank	11752352
TOP2A	TOP2A	Definite	TOP2A	PODOFILOX	inhibitor	TdgClinicalTrial|DrugBank|TEND	16061385|1334447|10783066|11752352|1845848|1331331
TOP2A	TOP2A	Definite	TOP2A	PACLITAXEL		TdgClinicalTrial
TOP2A	TOP2A	Definite	TOP2A	DAUNORUBICIN HYDROCHLORIDE	inhibitor	ChemblInteractions
TOP2A	TOP2A	Definite	TOP2A	FINAFLOXACIN	inhibitor	DrugBank	25808831
TOP2A	TOP2A	Definite	TOP2A	CIPROFLOXACIN	inhibitor	DrugBank	3015015|1323952|11752352
TOP2A	TOP2A	Definite	TOP2A	DAUNORUBICIN CITRATE	inhibitor	ChemblInteractions
TOP2A	TOP2A	Definite	TOP2A	LOMEFLOXACIN	inhibitor	DrugBank	11752352
TOP2A	TOP2A	Definite	TOP2A	DACTINOMYCIN	inhibitor	DrugBank	7756657
TOP2A	TOP2A	Definite	TOP2A	MITOXANTRONE	inhibitor	TdgClinicalTrial|DrugBank|NCI|TEND|GuideToPharmacologyInteractions	10451375|11004693|18687447|11752352|9631585|9494516|11278845|9426516
TOP2A	TOP2A	Definite	TOP2A	ETOPOSIDE PHOSPHATE	inhibitor	ChemblInteractions
TOP2A	TOP2A	Definite	TOP2A	DAUNORUBICIN	inhibitor	DTC|TdgClinicalTrial|DrugBank|NCI	22260166|1963303|6380596|9494516
TOP2A	TOP2A	Definite	TOP2A	DOXORUBICIN	inhibitor	DTC|TdgClinicalTrial|ClearityFoundationClinicalTrial|DrugBank|TEND|GuideToPharmacologyInteractions	21388138|17016621|17578914|17010609|17351394|26211460|11752352|20170164|17089011|22276998
TOP2A	TOP2A	Definite	TOP2A	DOXORUBICIN HYDROCHLORIDE	inhibitor	ChemblInteractions
TOP2A	TOP2A	Definite	TOP2A	EPIRUBICIN	inhibitor	TdgClinicalTrial|DrugBank|TEND|PharmGKB	14728934|16234514|17639997
TOP2A	TOP2A	Definite	TOP2A	IDARUBICIN	inhibitor	TdgClinicalTrial|DrugBank|TEND	10203104|8036155|12034365|11836027|11752352|10523799
TOP2A	TOP2A	Definite	TOP2A	VINCRISTINE		NCI	9494516
TOP2A	TOP2A	Definite	TOP2A	HYDROQUINONE		NCI	15833037
TOP2A	TOP2A	Definite	TOP2A	MOXIFLOXACIN	inhibitor	DrugBank	20802486|20596674|11752352
TOP2A	TOP2A	Definite	TOP2A	DIGITOXIN		DTC	16309315
TOP2A	TOP2A	Definite	TOP2A	LEVOFLOXACIN	inhibitor		11752352
TOP2A	TOP2A	Definite	TOP2A	ENOXACIN	inhibitor	DrugBank	18471102|11752352|10089819
TOP2A	TOP2A	Definite	TOP2A	MITOXANTRONE HYDROCHLORIDE	inhibitor	ChemblInteractions
TOP2A	TOP2A	Definite	TOP2A	TENIPOSIDE	inhibitor	TdgClinicalTrial|DrugBank|ChemblInteractions|NCI|TEND	8702194|16271071|17361331|17514873|11752352|16480143|9426516
TOP2A	TOP2A	Definite	TOP2A	NORFLOXACIN	inhibitor	DrugBank	11752352
TOP2A	TOP2A	Definite	TOP2A	OFLOXACIN	inhibitor	DrugBank	2847647
TOP2A	TOP2A	Definite	TOP2A	DEXRAZOXANE	inhibitor	DrugBank|NCI	11179439|17652819|10194547|11046078|12911317|17115008|11752352|11984069|11332155
TOP2A	TOP2A	Definite	TOP2A	ETOPOSIDE	inhibitor	DTC|TdgClinicalTrial|DrugBank|ChemblInteractions|NCI|TEND|GuideToPharmacologyInteractions	25466187|20006518|18258442|8823806|22867019|25240702|26291037|25003995|26216018|26292628|23360284|16271071|23920485|21435753|22867097|16759114|11678653|19386396|24931277|23566520|17361331|25922181|25941559|24507920|24775914|9485461|23353750|25815139|16309315|24012683|19691293|25800514|21644529|22620261|25945730|24334150|17514873|8870683|23711769|11752352|20863598|24095018|26264845|25799376|223647…
TOP2A	TOP2A	Definite	TOP2A	IDARUBICIN HYDROCHLORIDE	inhibitor	ChemblInteractions
TOP2A	TOP2A	Definite	TOP2A	AMSACRINE	inhibitor	DTC|DrugBank|NCI	1322791|8823806|10691026|8519659|19155103|22537681|17911018|8632768|19725581|11006484|11716434|11752352|25626146|11473732|1311390
TOP2A	TOP2A	Definite	TOP2A	VALRUBICIN	inhibitor	TdgClinicalTrial|DrugBank|ChemblInteractions|TEND	11752352|16019763
TOP2A	TOP2A	Definite	TOP2A	FLUOROURACIL		PharmGKB
ESYT2	ESYT2	Definite	ESYT2	METHYLPHENIDATE		PharmGKB	29382897
CLK4	CLK4	Definite	CLK4	ERLOTINIB		DTC
CLK4	CLK4	Definite	CLK4	IMATINIB		DTC
CLK4	CLK4	Definite	CLK4	PALBOCICLIB		DTC
CLK4	CLK4	Definite	CLK4	FOSTAMATINIB	inhibitor	DrugBank	26516587
NCOA1	NCOA1	Definite	NCOA1	TAMOXIFEN		PharmGKB	22174377
NCOA1	NCOA1	Definite	NCOA1	ETOPOSIDE		DTC
SF3A2	SF3A2	Definite	SF3A2	COPPER		DrugBank	15359738
TNFAIP3	TNFAIP3	Definite	TNFAIP3	METHOTREXATE		PharmGKB	20921970
TNFAIP3	TNFAIP3	Definite	TNFAIP3	USTEKINUMAB		PharmGKB	27564082|23521149
IDO1	IDO1	Definite	IDO1	CANNABIDIOL	inhibitor	DrugBank	26264914
MAP3K3	MAP3K3	Definite	MAP3K3	FOSTAMATINIB	inhibitor	DrugBank	26516587
VPS37A	VPS37A	Definite	VPS37A	CETUXIMAB			22016507
OXTR	OXTR	Definite	OXTR	ATOSIBAN	antagonist	DrugBank|TTD|GuideToPharmacologyInteractions	26586210|15705593|10519430|12763125
OXTR	OXTR	Definite	OXTR	SODIUM CHLORIDE		NCI	12907413
OXTR	OXTR	Definite	OXTR	CARBETOCIN	agonist	TdgClinicalTrial|DrugBank|TEND|TTD	15740719|11752352|9760035
OXTR	OXTR	Definite	OXTR	VASOPRESSIN	agonist	GuideToPharmacologyInteractions
OXTR	OXTR	Definite	OXTR	PROGESTERONE		NCI	12061859
OXTR	OXTR	Definite	OXTR	ESTRADIOL		NCI	3033233
OXTR	OXTR	Definite	OXTR	TESTOSTERONE		NCI	1846593
OXTR	OXTR	Definite	OXTR	DESMOPRESSIN	agonist	DTC|TTD|GuideToPharmacologyInteractions	24874785
OXTR	OXTR	Definite	OXTR	OXYTOCIN	agonist	TdgClinicalTrial|DrugBank|ChemblInteractions|TTD|GuideToPharmacologyInteractions	21208749|20108008|18655883|20104850|15646817
IL1R1	IL1R1	Definite	IL1R1	ALCOHOL		NCI	16272348
IL1R1	IL1R1	Definite	IL1R1	ANAKINRA	inhibitor|antagonist	TdgClinicalTrial|DrugBank|ChemblInteractions|NCI|TEND|TTD|GuideToPharmacologyInteractions	17083033|9555664|12355453|12817089|10210771|17498496|17352828|11752352
IL1R1	IL1R1	Definite	IL1R1	EPOETIN ALFA		NCI	16337691
LRP1	LRP1	Definite	LRP1	TENECTEPLASE		DrugBank	16303771|8344937|1378833
EGFR	EGFR	Definite	EGFR	NITROGLYCERIN		TTD
EGFR	EGFR	Definite	EGFR	AMLEXANOX			27287717
EGFR	EGFR	Definite	EGFR	IBRUTINIB	inhibitor	DTC|GuideToPharmacologyInteractions	24915291
EGFR	EGFR	Definite	EGFR	SORAFENIB		DTC|TTD	23629727|26743856|26318998|24166906
EGFR	EGFR	Definite	EGFR	FLUOROURACIL		PharmGKB	23816762
EGFR	EGFR	Definite	EGFR	LEUCOVORIN		PharmGKB	22486600
EGFR	EGFR	Definite	EGFR	NECITUMUMAB	antagonist|inhibitor|antibody	TALC|MyCancerGenome|TdgClinicalTrial|DrugBank|ChemblInteractions|TTD|GuideToPharmacologyInteractions	20197484
EGFR	EGFR	Definite	EGFR	DURVALUMAB			27225694
EGFR	EGFR	Definite	EGFR	PEMETREXED			24636847
EGFR	EGFR	Definite	EGFR	PANITUMUMAB	suppressor|antibody|inhibitor	TALC|ClearityFoundationBiomarkers|MyCancerGenome|TdgClinicalTrial|DrugBank|ChemblInteractions|TEND|DoCM|CGI|TTD|PharmGKB|FDA|GuideToPharmacologyInteractions	17355997|18681783|24653627|14967460|12620146|14990633|16467544|23959273|16377102|14990632|18784101|20623992|26888827|16857825|20481659|26843189|16257339|17664472|11894013|18003960|22270724|23022519|11255078|19339720|11752352|18316547|18503402|18343240|12648464|27312529|16012181|22594511
EGFR	EGFR	Definite	EGFR	CISPLATIN			23764753|27040853
EGFR	EGFR	Definite	EGFR	VANDETANIB	inhibitor	TALC|ClearityFoundationBiomarkers|MyCancerGenome|TdgClinicalTrial|ClearityFoundationClinicalTrial|DrugBank|ChemblInteractions|TTD|MyCancerGenomeClinicalTrial|PharmGKB|GuideToPharmacologyInteractions	18681783|14990633|16467544|16377102|14990632|18784101|25910950|16257339|18003960|23022519|11255078|19339720|18316547|12648464|22594511
EGFR	EGFR	Definite	EGFR	GEMCITABINE		PharmGKB	21783417|22285168
EGFR	EGFR	Definite	EGFR	TRASTUZUMAB		TEND	11752352
EGFR	EGFR	Definite	EGFR	FOSTAMATINIB	inhibitor	DrugBank	26516587
EGFR	EGFR	Definite	EGFR	BRIGATINIB	inhibitor	DrugBank|ChemblInteractions|GuideToPharmacologyInteractions	25888090|28597393|23239810
EGFR	EGFR	Definite	EGFR	ERLOTINIB HYDROCHLORIDE	inhibitor	ChemblInteractions
EGFR	EGFR	Definite	EGFR	GEFITINIB	antagonist|inhibitor	TALC|DTC|ClearityFoundationBiomarkers|MyCancerGenome|TdgClinicalTrial|DrugBank|ChemblInteractions|TEND|DoCM|CGI|TTD|COSMIC|MyCancerGenomeClinicalTrial|PharmGKB|FDA|OncoKB|GuideToPharmacologyInteractions	24533047|27468240|21258250|28089594|18681783|17375033|23470965|27664271|22370314|14990633|23993328|16467544|16377102|17317677|10815932|14990632|22789825|18784101|19969465|17020982|11522647|21274259|26936917|19473722|24410791|21921847|16912157|19589612|22261807|11585753|17463250|15728811|20573926|16258541|19692680|15118125|18227510|24165158|20826716|22581822|17192902|25964297|27196752|16203769|162…
EGFR	EGFR	Definite	EGFR	ATEZOLIZUMAB		PharmGKB|FDA	27225694
EGFR	EGFR	Definite	EGFR	DASATINIB			28416483
EGFR	EGFR	Definite	EGFR	IRINOTECAN			23209031|25185971
EGFR	EGFR	Definite	EGFR	RIBAVIRIN		PharmGKB	28703131
EGFR	EGFR	Definite	EGFR	CETUXIMAB	antagonist|inhibitor|antibody	TALC|ClearityFoundationBiomarkers|MyCancerGenome|TdgClinicalTrial|DrugBank|ChemblInteractions|TEND|DoCM|CGI|TTD|CancerCommons|FDA|GuideToPharmacologyInteractions	26619011|27149458|19455431|22452896|24653627|26059438|24934779|23102728|25623215|20068085|27102076|16707764|17653080|26888827|15710947|20479403|27216155|25668228|26341921|16912157|24893891|15728811|20573926|16258541|19692680|15118125|18227510|24063894|24658966|18199554|19922469|27251290|10601294|20033049|26515464|26843189|25923549|21783417|19692684|27207775|22753918|16187797|11408594|22452895|180…
EGFR	EGFR	Definite	EGFR	PACLITAXEL		PharmGKB	24886365|22370314|20573926|19692680|22581822|21783417|22285168|21900837|20022809
EGFR	EGFR	Definite	EGFR	PEMBROLIZUMAB		PharmGKB|FDA	27225694
EGFR	EGFR	Definite	EGFR	CARBOPLATIN		PharmGKB	22370314|20573926|19692680|22581822|21783417|22285168|21900837|20022809
EGFR	EGFR	Definite	EGFR	ERDAFITINIB			28341788
EGFR	EGFR	Definite	EGFR	BOSUTINIB			28416483
EGFR	EGFR	Definite	EGFR	SIROLIMUS		DoCM|CGI	24934779|24813888|25157968|18089823
EGFR	EGFR	Definite	EGFR	REGORAFENIB		PharmGKB	23629727
EGFR	EGFR	Definite	EGFR	NERATINIB	inhibitor	TALC|TdgClinicalTrial|DrugBank|ChemblInteractions|TTD|PharmGKB|GuideToPharmacologyInteractions	18681783|14990633|16467544|16377102|14990632|18784101|20479403|16257339|17085664|18003960|23022519|11255078|19339720|18316547|25948633|12648464|26206867|25931286|21325073|22594511
EGFR	EGFR	Definite	EGFR	VEMURAFENIB			27312529
EGFR	EGFR	Definite	EGFR	SONIDEGIB			26124204
EGFR	EGFR	Definite	EGFR	DABRAFENIB			27312529
EGFR	EGFR	Definite	EGFR	ACALABRUTINIB	inhibitor	GuideToPharmacologyInteractions
EGFR	EGFR	Definite	EGFR	TEMOZOLOMIDE			25910950|26846818
EGFR	EGFR	Definite	EGFR	SUNITINIB			27149458
EGFR	EGFR	Definite	EGFR	TRAMETINIB			28783719|26036643|26582713|27312529
EGFR	EGFR	Definite	EGFR	EVEROLIMUS			23629727
EGFR	EGFR	Definite	EGFR	DACOMITINIB	inhibitor	TALC|DTC|MyCancerGenome|TdgClinicalTrial|DrugBank|ChemblInteractions|TTD|CancerCommons|MyCancerGenomeClinicalTrial|PharmGKB|FDA|OncoKB|GuideToPharmacologyInteractions	24857124|23930994|23294134|26768165|28958502|28363995|21764376|9751783|26561558|27913578|25456362|25939761|21430269|26206867|18089823
EGFR	EGFR	Definite	EGFR	ETOPOSIDE			27216155
EGFR	EGFR	Definite	EGFR	LIDOCAINE	antagonist	TdgClinicalTrial|DrugBank	16551906
EGFR	EGFR	Definite	EGFR	DECITABINE			24874286
EGFR	EGFR	Definite	EGFR	CABOZANTINIB			27694386|27825638
EGFR	EGFR	Definite	EGFR	NIVOLUMAB		PharmGKB|FDA	27225694|28407039
EGFR	EGFR	Definite	EGFR	AFATINIB	inhibitor	TALC|DTC|MyCancerGenome|TdgClinicalTrial|DrugBank|DoCM|CGI|COSMIC|MyCancerGenomeClinicalTrial|PharmGKB|FDA|OncoKB|GuideToPharmacologyInteractions	26619011|19455431|22452896|23982599|18681783|23102728|23930994|24035188|14990633|16467544|20068085|16377102|27044931|27694386|27102076|14990632|16707764|18784101|17653080|15710947|20479403|25589191|26051236|26354527|25668228|26341921|24439929|16912157|24893891|25589492|15728811|20573926|16258541|19692680|15118125|18227510|24658966|18199554|27083334|19922469|20033049|25964297|28363995|26515464|259…
EGFR	EGFR	Definite	EGFR	LAPATINIB	inhibitor|antagonist	TALC|DTC|TdgClinicalTrial|ClearityFoundationClinicalTrial|DrugBank|TEND|DoCM|CGI|TTD|CancerCommons|PharmGKB|OncoKB|GuideToPharmacologyInteractions	25305330|18681783|27595477|12214266|14990633|16467544|16377102|20110044|20215545|14990632|18784101|23917401|15374980|14633707|18199554|16257339|24355130|16894399|18003960|14751502|23022519|11255078|18408761|19339720|11752352|18316547|14737100|18803986|22885469|15163842|12648464|20658522|14967461|22594511
EGFR	EGFR	Definite	EGFR	ENCORAFENIB			27312529
EGFR	EGFR	Definite	EGFR	RAMUCIRUMAB		PharmGKB|FDA
EGFR	EGFR	Definite	EGFR	OSIMERTINIB	inhibitor	MyCancerGenome|DrugBank|ChemblInteractions|CGI|TTD|COSMIC|PharmGKB|FDA|OncoKB|GuideToPharmacologyInteractions	26522274|27694386|27102076|24410791|24893891|27959700|25923549|25870145|26729184|28202511|28416483|26286086|25948633|27393507|27252416|25939061|26720284|26206867|27216193|28343545|27435396
EGFR	EGFR	Definite	EGFR	TEGAFUR		PharmGKB	22486600
EGFR	EGFR	Definite	EGFR	PONATINIB			22238366
EGFR	EGFR	Definite	EGFR	ALCOHOL		NCI	10092515
EGFR	EGFR	Definite	EGFR	BEVACIZUMAB			28408243
EGFR	EGFR	Definite	EGFR	ERLOTINIB	antagonist|inhibitor	TALC|DTC|ClearityFoundationBiomarkers|MyCancerGenome|TdgClinicalTrial|ClearityFoundationClinicalTrial|DrugBank|TEND|DoCM|CGI|TTD|CancerCommons|COSMIC|PharmGKB|FDA|OncoKB|GuideToPharmacologyInteractions	26619011|26324372|17877814|25870087|19455431|27468240|22452896|21258250|18652519|28089594|18681783|23470965|23102728|27664271|26773740|14990633|16467544|20068085|16377102|27694386|27102076|14990632|12517254|26768165|16707764|18784101|19969465|17653080|17020982|15710947|20479403|27216155|23917401|24410791|21921847|25668228|26341921|19015641|16912157|19589612|24893891|27760111|18309947|15728811|205…
EGFR	EGFR	Definite	EGFR	CRIZOTINIB			27595477|27393507|27283993
EGFR	EGFR	Definite	EGFR	AFATINIB DIMALEATE	inhibitor	ChemblInteractions
EGFR	EGFR	Definite	EGFR	OSIMERTINIB MESYLATE	inhibitor	ChemblInteractions
EGFR	EGFR	Definite	EGFR	IMATINIB		PharmGKB	28762371|22323597
EGFR	EGFR	Definite	EGFR	LAPATINIB DITOSYLATE	inhibitor	ChemblInteractions
EGFR	EGFR	Definite	EGFR	TEMSIROLIMUS			24470557
EGFR	EGFR	Definite	EGFR	DOCETAXEL		PharmGKB	21783417|22285168
ATP1B3	ATP1B3	Definite	ATP1B3	DIGITOXIN	inhibitor	ChemblInteractions
ATP1B3	ATP1B3	Definite	ATP1B3	DESLANOSIDE	inhibitor	ChemblInteractions
ATP1B3	ATP1B3	Definite	ATP1B3	ACETYLDIGITOXIN	inhibitor	ChemblInteractions
ATP1B3	ATP1B3	Definite	ATP1B3	DIGOXIN	inhibitor	ChemblInteractions
CBS	CBS	Definite	CBS	CYSTEINE		DrugBank	17377202|15671155|17488480|16428267|16781459
CBS	CBS	Definite	CBS	METHIONINE		PharmGKB	24651765
CBS	CBS	Definite	CBS	ADEMETIONINE	activator	DrugBank	12269827|11524006|12163655|11559709
IL2RB	IL2RB	Definite	IL2RB	BASILIXIMAB	inhibitor|antibody	DrugBank|ChemblInteractions	10708100|12667677|12826150|10188761|11752352|11840795
IL2RB	IL2RB	Definite	IL2RB	DACLIZUMAB	inhibitor|antibody	DrugBank|ChemblInteractions	15022409|2647626|15814281|12372041|11752352|2571203
IL2RB	IL2RB	Definite	IL2RB	ALDESLEUKIN	modulator|agonist	TdgClinicalTrial|DrugBank|ChemblInteractions|TEND	16596189|16617454|16542139|11752352|16569767|16477002
IL2RB	IL2RB	Definite	IL2RB	DENILEUKIN DIFTITOX	agonist	DrugBank|ChemblInteractions	18684057|17187516|11752352|15811959|16516670
SERPINA1	SERPINA1	Definite	SERPINA1	COPPER		DrugBank	23896426
SERPINA1	SERPINA1	Definite	SERPINA1	METHYLDOPA		DrugBank	23896426
KCNK5	KCNK5	Definite	KCNK5	HALOTHANE	activator	GuideToPharmacologyInteractions
KCNK5	KCNK5	Definite	KCNK5	QUINIDINE	blocker	GuideToPharmacologyInteractions
CACNG7	CACNG7	Definite	CACNG7	BEPRIDIL HYDROCHLORIDE	blocker	ChemblInteractions
CACNG7	CACNG7	Definite	CACNG7	PREGABALIN	modulator	ChemblInteractions
CACNG7	CACNG7	Definite	CACNG7	GABAPENTIN	modulator	ChemblInteractions
CACNG7	CACNG7	Definite	CACNG7	GABAPENTIN ENACARBIL	modulator	ChemblInteractions
VEGFB	VEGFB	Definite	VEGFB	AFLIBERCEPT	antibody|binder	MyCancerGenome|DrugBank|TTD|PharmGKB	22813448|20124951
VEGFB	VEGFB	Definite	VEGFB	BEVACIZUMAB		ClearityFoundationClinicalTrial|PharmGKB	20124951
VEGFB	VEGFB	Definite	VEGFB	LENALIDOMIDE		ClearityFoundationClinicalTrial
IRAK3	IRAK3	Definite	IRAK3	FOSTAMATINIB	inhibitor	DrugBank	26516587
OASL	OASL	Definite	OASL	RIBAVIRIN		PharmGKB	21993426
ARF1	ARF1	Definite	ARF1	GLYCERIN		DrugBank	10592235|17139284|17016423
AVPR1A	AVPR1A	Definite	AVPR1A	DESMOPRESSIN	agonist	TdgClinicalTrial|DrugBank|TEND|TTD|GuideToPharmacologyInteractions	8957254|10731046|10594321|15613460
AVPR1A	AVPR1A	Definite	AVPR1A	ATOSIBAN	antagonist	DrugBank|TTD|GuideToPharmacologyInteractions	10519430
AVPR1A	AVPR1A	Definite	AVPR1A	DESMOPRESSIN ACETATE	agonist	ChemblInteractions
AVPR1A	AVPR1A	Definite	AVPR1A	VASOPRESSIN	agonist	TdgClinicalTrial|DrugBank|ChemblInteractions|TEND|GuideToPharmacologyInteractions	17275806|16011575|16511036|16532916|17303660
AVPR1A	AVPR1A	Definite	AVPR1A	OXYTOCIN	agonist	TTD|GuideToPharmacologyInteractions
AVPR1A	AVPR1A	Definite	AVPR1A	TOLVAPTAN	antagonist	DrugBank|GuideToPharmacologyInteractions	20637957
AVPR1A	AVPR1A	Definite	AVPR1A	VASOPRESSIN TANNATE	agonist	ChemblInteractions
AVPR1A	AVPR1A	Definite	AVPR1A	CONIVAPTAN	antagonist	TdgClinicalTrial|DrugBank|TEND|TTD|GuideToPharmacologyInteractions	19057376|17919259|16522696|20054444|17202666|11752352|17428103|19663609|17592003|19695403
AVPR1A	AVPR1A	Definite	AVPR1A	TERLIPRESSIN	stimulator	TdgClinicalTrial|DrugBank|TEND|TTD	17275806|16011575|16511036|16532916|11752352|17303660
AVPR1A	AVPR1A	Definite	AVPR1A	CONIVAPTAN HYDROCHLORIDE	antagonist	ChemblInteractions
AVPR1A	AVPR1A	Definite	AVPR1A	CARBETOCIN		DTC	24874785
AVPR1A	AVPR1A	Definite	AVPR1A	LYPRESSIN	agonist	DrugBank|ChemblInteractions	17275806|16011575|16511036|16532916|17303660
BRD4	BRD4	Definite	BRD4	ESTAZOLAM		DTC	22137933
BRD4	BRD4	Definite	BRD4	DOCETAXEL		NCI	16542442
BRD4	BRD4	Definite	BRD4	ALPRAZOLAM		DTC	22137933
BRD4	BRD4	Definite	BRD4	MIDAZOLAM		DTC	22137933
BRD4	BRD4	Definite	BRD4	COLCHICINE	inhibitor	GuideToPharmacologyInteractions
EIF3A	EIF3A	Definite	EIF3A	CARBOPLATIN		PharmGKB	23127338
EIF3A	EIF3A	Definite	EIF3A	CISPLATIN		PharmGKB	23127338
EEF2K	EEF2K	Definite	EEF2K	LAPATINIB		TTD
MMAA	MMAA	Definite	MMAA	CYANOCOBALAMIN	binder|cofactor	DrugBank	19700356|15523652|16697227|17139284|29862147|17016423
MMAA	MMAA	Definite	MMAA	HYDROXOCOBALAMIN		DrugBank	20301409|17139284|17016423
IL1A	IL1A	Definite	IL1A	OLANZAPINE		PharmGKB	21107309
IL1A	IL1A	Definite	IL1A	RILONACEPT	binder	TdgClinicalTrial|DrugBank|TEND	23319019|23553601
IL1A	IL1A	Definite	IL1A	HYDROXYCHLOROQUINE		NCI	8336306
PDK4	PDK4	Definite	PDK4	TRETINOIN		DrugBank	16757381
BCL2L11	BCL2L11	Definite	BCL2L11	IMATINIB		PharmGKB	24223824|22426421
SPTBN1	SPTBN1	Definite	SPTBN1	CALCIUM	agonist	DrugBank	1537825
C3	C3	Definite	C3	METHYLDOPA		DrugBank	23896426
C3	C3	Definite	C3	CLOZAPINE		PharmGKB	26503818
C3	C3	Definite	C3	COPPER		DrugBank	23896426
DMD	DMD	Definite	DMD	ATALUREN		TTD
DMD	DMD	Definite	DMD	ETEPLIRSEN		PharmGKB|FDA
CFLAR	CFLAR	Definite	CFLAR	NINTEDANIB		ClearityFoundationClinicalTrial
CFLAR	CFLAR	Definite	CFLAR	FINASTERIDE		NCI	11399535
CFLAR	CFLAR	Definite	CFLAR	BICALUTAMIDE			22623731
CFLAR	CFLAR	Definite	CFLAR	CABOZANTINIB		ClearityFoundationClinicalTrial
ABCC3	ABCC3	Definite	ABCC3	CEFOXITIN		DTC	22166395
ABCC3	ABCC3	Definite	ABCC3	ABACAVIR		DTC	17172311
ABCC3	ABCC3	Definite	ABCC3	CEPHRADINE		DTC	22166395
ABCC3	ABCC3	Definite	ABCC3	CEPHALEXIN		DTC	22166395
ABCC3	ABCC3	Definite	ABCC3	CEFTRIAXONE		DTC	22166395
ABCC3	ABCC3	Definite	ABCC3	CISPLATIN		PharmGKB	25141953|22016816|31666714|27457817
ABCC3	ABCC3	Definite	ABCC3	METHOTREXATE		PharmGKB	22016816|21317831|21606946
ABCC3	ABCC3	Definite	ABCC3	LAMIVUDINE		DTC|PharmGKB	17172311
ABCC3	ABCC3	Definite	ABCC3	EMTRICITABINE		DTC	17172311
ABCC3	ABCC3	Definite	ABCC3	DOXORUBICIN		DTC|PharmGKB	22016816
ABCC3	ABCC3	Definite	ABCC3	CEFACLOR		DTC	22166395
ABCC3	ABCC3	Definite	ABCC3	CEFOPERAZONE		DTC	22166395
ABCC3	ABCC3	Definite	ABCC3	CYCLOPHOSPHAMIDE		PharmGKB	22016816
ABCC3	ABCC3	Definite	ABCC3	NEVIRAPINE		DTC	17172311
ABCC3	ABCC3	Definite	ABCC3	MORPHINE		PharmGKB	32090339
ABCC3	ABCC3	Definite	ABCC3	VINCRISTINE		PharmGKB	22016816
ABCC3	ABCC3	Definite	ABCC3	CEFAMANDOLE		DTC	22166395
ABCC3	ABCC3	Definite	ABCC3	DELAVIRDINE		DTC	17172311
ABCC3	ABCC3	Definite	ABCC3	CEFUROXIME		DTC	22166395
ABCC3	ABCC3	Definite	ABCC3	EFAVIRENZ		DTC	21189339|17172311
ABCC3	ABCC3	Definite	ABCC3	ETRAVIRINE		DTC	21189339
ABCC3	ABCC3	Definite	ABCC3	PACLITAXEL			18593940
ABCC3	ABCC3	Definite	ABCC3	CEFMETAZOLE		DTC	22166395
SLC1A5	SLC1A5	Definite	SLC1A5	GLUTAMINE		NCI	11997238
KMT2E	KMT2E	Definite	KMT2E	DULOXETINE		PharmGKB	28696415
IDH1	IDH1	Definite	IDH1	GEMCITABINE		JAX-CKB	26853339
IDH1	IDH1	Definite	IDH1	THIMEROSAL		DTC
IDH1	IDH1	Definite	IDH1	IVOSIDENIB	inhibitor	DrugBank|CGI|TTD|PharmGKB|JAX-CKB|FDA|OncoKB|GuideToPharmacologyInteractions	25583779|2073994|23558169|29950729|31300360|32208957|29860938|32416072
IDH1	IDH1	Definite	IDH1	DOXORUBICIN HYDROCHLORIDE		DTC
IDH1	IDH1	Definite	IDH1	AZELASTINE HYDROCHLORIDE		DTC
IDH1	IDH1	Definite	IDH1	LEVOMEPROMAZINE MALEATE		DTC
IDH1	IDH1	Definite	IDH1	SALMETEROL XINAFOATE		DTC
IDH1	IDH1	Definite	IDH1	METFORMIN		JAX-CKB	26363012
IDH1	IDH1	Definite	IDH1	OLAPARIB		JAX-CKB	29339439|28148839
IDH1	IDH1	Definite	IDH1	VENETOCLAX		CGI|PharmGKB|JAX-CKB|FDA	27520294
IDH1	IDH1	Definite	IDH1	ETHACRYNIC ACID		DTC
IDH1	IDH1	Definite	IDH1	TEMOZOLOMIDE		JAX-CKB	25910950
IDH1	IDH1	Definite	IDH1	MAPROTILINE HYDROCHLORIDE		DTC
IDH1	IDH1	Definite	IDH1	PYRIMETHAMINE		DTC
IDH1	IDH1	Definite	IDH1	DASATINIB		CGI|JAX-CKB	27231123
IDH1	IDH1	Definite	IDH1	PEMBROLIZUMAB		JAX-CKB	30742119
IDH1	IDH1	Definite	IDH1	MICONAZOLE		DTC
IDH1	IDH1	Definite	IDH1	PIMOZIDE		DTC
IDH1	IDH1	Definite	IDH1	VANDETANIB		JAX-CKB	25910950
IDH1	IDH1	Definite	IDH1	LANATOSIDE C		DTC
IDH1	IDH1	Definite	IDH1	DAUNORUBICIN HYDROCHLORIDE		DTC
IDH1	IDH1	Definite	IDH1	DAUNORUBICIN		JAX-CKB	29339439
IDH1	IDH1	Definite	IDH1	SAQUINAVIR		DTC
IDH1	IDH1	Definite	IDH1	TANNIC ACID		DTC
IDH1	IDH1	Definite	IDH1	HALOFANTRINE HYDROCHLORIDE		DTC
IDH1	IDH1	Definite	IDH1	TRIAMTERENE		DTC
IDH1	IDH1	Definite	IDH1	PAROXETINE HYDROCHLORIDE		DTC
IDH1	IDH1	Definite	IDH1	SERTRALINE HYDROCHLORIDE		DTC
IDH1	IDH1	Definite	IDH1	NICLOSAMIDE		DTC
IDH1	IDH1	Definite	IDH1	MOMETASONE FUROATE		DTC
IDH1	IDH1	Definite	IDH1	LOMUSTINE		JAX-CKB	26762204
IDH1	IDH1	Definite	IDH1	NIVOLUMAB		JAX-CKB	30742119
IDH1	IDH1	Definite	IDH1	EPIRUBICIN HYDROCHLORIDE		DTC
IDH1	IDH1	Definite	IDH1	BEVACIZUMAB		JAX-CKB	26762204
IDH1	IDH1	Definite	IDH1	METHOTREXATE		DTC
IDH1	IDH1	Definite	IDH1	BEPRIDIL		DTC
IDH1	IDH1	Definite	IDH1	RALOXIFENE HYDROCHLORIDE		DTC
IDH1	IDH1	Definite	IDH1	IDARUBICIN HYDROCHLORIDE		DTC
IDH1	IDH1	Definite	IDH1	VINBLASTINE SULFATE		DTC
IDH1	IDH1	Definite	IDH1	MEFLOQUINE HYDROCHLORIDE		DTC
IDH1	IDH1	Definite	IDH1	RUCAPARIB		JAX-CKB	28148839
IDH1	IDH1	Definite	IDH1	THONZONIUM BROMIDE		DTC
IDH1	IDH1	Definite	IDH1	AMCINONIDE		DTC
IDH1	IDH1	Definite	IDH1	CICLOPIROX OLAMINE		DTC
IDH1	IDH1	Definite	IDH1	DIGOXIN		DTC
IDH1	IDH1	Definite	IDH1	AZATHIOPRINE		DTC
IDH1	IDH1	Definite	IDH1	MITOXANTRONE HYDROCHLORIDE		DTC
IDH1	IDH1	Definite	IDH1	METHIXENE HYDROCHLORIDE		DTC
IDH1	IDH1	Definite	IDH1	CHLORPROMAZINE		DTC
IDH1	IDH1	Definite	IDH1	LOVASTATIN		DTC
IDH1	IDH1	Definite	IDH1	THIOGUANINE		DTC
IDH1	IDH1	Definite	IDH1	FLUSPIRILENE		DTC
IDH1	IDH1	Definite	IDH1	PYRITHIONE		DTC
IDH1	IDH1	Definite	IDH1	VORINOSTAT		JAX-CKB	31151327
IDH1	IDH1	Definite	IDH1	CYTARABINE		JAX-CKB
IDH1	IDH1	Definite	IDH1	NIRAPARIB		JAX-CKB	28148839
IDH1	IDH1	Definite	IDH1	ISOCONAZOLE		DTC
IDH1	IDH1	Definite	IDH1	AZACITIDINE		DTC|JAX-CKB	24077805
IDH1	IDH1	Definite	IDH1	TRICLABENDAZOLE		DTC
IDH1	IDH1	Definite	IDH1	TRIFLUPROMAZINE HYDROCHLORIDE		DTC
IDH1	IDH1	Definite	IDH1	FLOXURIDINE		DTC
IDH1	IDH1	Definite	IDH1	CISPLATIN		JAX-CKB	28148839
IDH1	IDH1	Definite	IDH1	TALAZOPARIB		JAX-CKB	29339439|28148839
IDH1	IDH1	Definite	IDH1	LOPERAMIDE HYDROCHLORIDE		DTC
IDH1	IDH1	Definite	IDH1	DIGITOXIN		DTC
IDH1	IDH1	Definite	IDH1	TAMOXIFEN		DTC
IDH1	IDH1	Definite	IDH1	TOPOTECAN HYDROCHLORIDE		DTC
IDH1	IDH1	Definite	IDH1	ESTRADIOL VALERATE		DTC
IDH1	IDH1	Definite	IDH1	OUABAIN		DTC
IDH1	IDH1	Definite	IDH1	SIMVASTATIN		DTC
IDH1	IDH1	Definite	IDH1	PROTRIPTYLINE HYDROCHLORIDE		DTC
IDH1	IDH1	Definite	IDH1	MICONAZOLE NITRATE		DTC
IDH1	IDH1	Definite	IDH1	ACRIFLAVINE		DTC
IDH1	IDH1	Definite	IDH1	MEBEVERINE HYDROCHLORIDE		DTC
IDH1	IDH1	Definite	IDH1	CHLORPROMAZINE HYDROCHLORIDE		DTC
IDH1	IDH1	Definite	IDH1	NIFUROXAZIDE		DTC
IDH1	IDH1	Definite	IDH1	THIOTHIXENE		DTC
IDH1	IDH1	Definite	IDH1	GALANTAMINE HYDROBROMIDE		DTC
IDH1	IDH1	Definite	IDH1	QUINESTROL		DTC
IDH1	IDH1	Definite	IDH1	IMATINIB MESYLATE		DTC
IDH1	IDH1	Definite	IDH1	PROCHLORPERAZINE		DTC
IDH1	IDH1	Definite	IDH1	SERTRALINE		DTC
IDH1	IDH1	Definite	IDH1	MERCAPTOPURINE		DTC
IDH1	IDH1	Definite	IDH1	MERCAPTOPURINE		DTC
IDH1	IDH1	Definite	IDH1	DECITABINE		JAX-CKB	24077826
IDH1	IDH1	Definite	IDH1	HEXACHLOROPHENE		DTC
IDH1	IDH1	Definite	IDH1	NORTRIPTYLINE HYDROCHLORIDE		DTC
GABRE	GABRE	Definite	GABRE	ENFLURANE		ChemblInteractions
GABRE	GABRE	Definite	GABRE	METHOHEXITAL SODIUM	positive modulator	ChemblInteractions
GABRE	GABRE	Definite	GABRE	MIDAZOLAM	potentiator	TdgClinicalTrial|TEND	18384456|11752090
GABRE	GABRE	Definite	GABRE	CHLORDIAZEPOXIDE HYDROCHLORIDE	positive modulator	ChemblInteractions
GABRE	GABRE	Definite	GABRE	METHYPRYLON	positive modulator	ChemblInteractions
GABRE	GABRE	Definite	GABRE	THIOPENTAL SODIUM	positive modulator	ChemblInteractions
GABRE	GABRE	Definite	GABRE	TRICLOFOS SODIUM		ChemblInteractions
GABRE	GABRE	Definite	GABRE	TEMAZEPAM	potentiator|positive modulator	TdgClinicalTrial|ChemblInteractions|TEND	18384456|20138190
GABRE	GABRE	Definite	GABRE	CLOBAZAM	positive modulator	TdgClinicalTrial|ChemblInteractions|TEND
GABRE	GABRE	Definite	GABRE	CLORAZEPATE DIPOTASSIUM	positive modulator	ChemblInteractions
GABRE	GABRE	Definite	GABRE	QUAZEPAM	positive modulator|potentiator	TdgClinicalTrial|ChemblInteractions|TEND	3017690|2892106
GABRE	GABRE	Definite	GABRE	CHLORDIAZEPOXIDE	positive modulator	TdgClinicalTrial|ChemblInteractions|TEND
GABRE	GABRE	Definite	GABRE	ETOMIDATE		DTC|ChemblInteractions	16884293
GABRE	GABRE	Definite	GABRE	FLURAZEPAM	potentiator	TdgClinicalTrial|TEND	18384456|11752090
GABRE	GABRE	Definite	GABRE	BUTALBITAL	positive modulator	ChemblInteractions
GABRE	GABRE	Definite	GABRE	DESFLURANE	positive modulator	ChemblInteractions
GABRE	GABRE	Definite	GABRE	ALPRAZOLAM	positive modulator	TdgClinicalTrial|ChemblInteractions|TEND
GABRE	GABRE	Definite	GABRE	ESTAZOLAM	positive modulator|potentiator	TdgClinicalTrial|ChemblInteractions|TEND	639854|2889803
GABRE	GABRE	Definite	GABRE	SEVOFLURANE	positive modulator	ChemblInteractions
GABRE	GABRE	Definite	GABRE	BROMAZEPAM	potentiator	TdgClinicalTrial|TEND	18384456
GABRE	GABRE	Definite	GABRE	TOPIRAMATE		ChemblInteractions
GABRE	GABRE	Definite	GABRE	HALAZEPAM	potentiator|positive modulator	TdgClinicalTrial|ChemblInteractions|TEND	6738302|2867566
GABRE	GABRE	Definite	GABRE	FLUMAZENIL		ChemblInteractions
GABRE	GABRE	Definite	GABRE	TALBUTAL	positive modulator	ChemblInteractions
GABRE	GABRE	Definite	GABRE	PROPOFOL	positive modulator	ChemblInteractions
GABRE	GABRE	Definite	GABRE	OXAZEPAM	positive modulator|potentiator	TdgClinicalTrial|ChemblInteractions|TEND	18384456|11752090
GABRE	GABRE	Definite	GABRE	HALOTHANE	positive modulator	ChemblInteractions
GABRE	GABRE	Definite	GABRE	CLOTIAZEPAM	potentiator	TdgClinicalTrial|TEND	18855614
GABRE	GABRE	Definite	GABRE	ESZOPICLONE	positive modulator	ChemblInteractions
GABRE	GABRE	Definite	GABRE	BUTABARBITAL SODIUM	positive modulator	ChemblInteractions
GABRE	GABRE	Definite	GABRE	ISOFLURANE	positive modulator	ChemblInteractions
GABRE	GABRE	Definite	GABRE	MEPROBAMATE	agonist	ChemblInteractions
GABRE	GABRE	Definite	GABRE	ETHCHLORVYNOL		ChemblInteractions
GABRE	GABRE	Definite	GABRE	ALCOHOL		DrugBank	17591544|12921221
GABRE	GABRE	Definite	GABRE	PRIMIDONE	positive modulator	ChemblInteractions
GABRE	GABRE	Definite	GABRE	ACAMPROSATE CALCIUM		ChemblInteractions
GABRE	GABRE	Definite	GABRE	CLONAZEPAM	positive modulator	TdgClinicalTrial|ChemblInteractions|TEND
GABRE	GABRE	Definite	GABRE	CLORAZEPIC ACID		TdgClinicalTrial|TEND
GABRE	GABRE	Definite	GABRE	THIAMYLAL SODIUM	positive modulator	ChemblInteractions
GABRE	GABRE	Definite	GABRE	KETAZOLAM	potentiator		18384456|11752090
GABRE	GABRE	Definite	GABRE	LORAZEPAM	positive modulator	TdgClinicalTrial|ChemblInteractions|TEND
GABRE	GABRE	Definite	GABRE	DIAZEPAM	positive modulator|potentiator	TdgClinicalTrial|ChemblInteractions|TEND	18384456|11752090
GABRE	GABRE	Definite	GABRE	NITRAZEPAM	potentiator	TdgClinicalTrial|TEND	18384456|11752090
GABRE	GABRE	Definite	GABRE	METHARBITAL	positive modulator	ChemblInteractions
GABRE	GABRE	Definite	GABRE	PRAZEPAM	positive modulator|potentiator	TdgClinicalTrial|ChemblInteractions|TEND	7773620
GABRE	GABRE	Definite	GABRE	GLUTETHIMIDE		ChemblInteractions
GABRE	GABRE	Definite	GABRE	MIDAZOLAM HYDROCHLORIDE	positive modulator	ChemblInteractions
SLC2A3	SLC2A3	Definite	SLC2A3	INSULIN		NCI	12814351
PURA	PURA	Definite	PURA	METHYLPHENIDATE		PharmGKB	29382897
VEGFC	VEGFC	Definite	VEGFC	AFLIBERCEPT		PharmGKB	20124951
VEGFC	VEGFC	Definite	VEGFC	LENALIDOMIDE		ClearityFoundationClinicalTrial
VEGFC	VEGFC	Definite	VEGFC	BEVACIZUMAB		ClearityFoundationClinicalTrial|PharmGKB	20124951
LAMB1	LAMB1	Definite	LAMB1	OCRIPLASMIN		ChemblInteractions
MLLT3	MLLT3	Definite	MLLT3	CISPLATIN		PharmGKB	27150640
MLLT3	MLLT3	Definite	MLLT3	MONTELUKAST		PharmGKB	26083242
NFKBIA	NFKBIA	Definite	NFKBIA	GEFITINIB		PharmGKB	31664190
MYLK	MYLK	Definite	MYLK	FOSTAMATINIB	inhibitor	DrugBank	26516587
SLC4A1	SLC4A1	Definite	SLC4A1	ATENOLOL		PharmGKB
SLC4A1	SLC4A1	Definite	SLC4A1	METOPROLOL		PharmGKB
CCKAR	CCKAR	Definite	CCKAR	CERULETIDE	inducer	TdgClinicalTrial|DrugBank|TEND	8182534|1620654|3440035|2087492|2587420|1356589
CCKAR	CCKAR	Definite	CCKAR	CERULETIDE DIETHYLAMINE	agonist	ChemblInteractions
CCKAR	CCKAR	Definite	CCKAR	SINCALIDE	agonist	DrugBank|TTD|GuideToPharmacologyInteractions	2991034
FHL2	FHL2	Definite	FHL2	GEMCITABINE		PharmGKB	24444404
IMPDH2	IMPDH2	Definite	IMPDH2	THIOGUANINE	inhibitor	ChemblInteractions|GuideToPharmacologyInteractions
IMPDH2	IMPDH2	Definite	IMPDH2	MYCOPHENOLIC ACID	inhibitor	ChemblInteractions
IMPDH2	IMPDH2	Definite	IMPDH2	MYCOPHENOLATE MOFETIL	inhibitor	ChemblInteractions
IMPDH2	IMPDH2	Definite	IMPDH2	CYCLOSPORINE		PharmGKB	21996196|19770842|18444945|19617864|22960765
IMPDH2	IMPDH2	Definite	IMPDH2	MYCOPHENOLATE MOFETIL HYDROCHLORIDE	inhibitor	ChemblInteractions
IMPDH2	IMPDH2	Definite	IMPDH2	RIBAVIRIN	inhibitor	DrugBank|GuideToPharmacologyInteractions	29792360|17139284|17016423|10722482
KRT8	KRT8	Definite	KRT8	TENECTEPLASE		DrugBank	9988531|8810346|8760360
KRT8	KRT8	Definite	KRT8	COPPER		DrugBank	14534351
ATP7A	ATP7A	Definite	ATP7A	PROGESTERONE		NCI	9359859
ATP7A	ATP7A	Definite	ATP7A	CARBOPLATIN		NCI	14676106
ATP7A	ATP7A	Definite	ATP7A	THALIDOMIDE		PharmGKB	20038957
ATP7A	ATP7A	Definite	ATP7A	DOCETAXEL		PharmGKB	20038957
ATP7A	ATP7A	Definite	ATP7A	OXALIPLATIN		NCI	15269138
PRRC2A	PRRC2A	Definite	PRRC2A	GEMCITABINE		PharmGKB	31616045
PRRC2A	PRRC2A	Definite	PRRC2A	CARBAMAZEPINE		PharmGKB	16538176
PRRC2A	PRRC2A	Definite	PRRC2A	CARBOPLATIN		PharmGKB	31616045
PRKDC	PRKDC	Definite	PRKDC	CAFFEINE	inhibitor	DrugBank	12145276
PIN1	PIN1	Definite	PIN1	IRINOTECAN		PharmGKB
PIN1	PIN1	Definite	PIN1	OXALIPLATIN		PharmGKB
STK4	STK4	Definite	STK4	BOSUTINIB	inhibitor	GuideToPharmacologyInteractions
CDH1	CDH1	Definite	CDH1	BICALUTAMIDE		CGI
CDH1	CDH1	Definite	CDH1	CAPECITABINE		JAX-CKB	26487584
CDH1	CDH1	Definite	CDH1	ERLOTINIB		JAX-CKB	26251290
CDH1	CDH1	Definite	CDH1	LAPATINIB		JAX-CKB	26487584
COL1A1	COL1A1	Definite	COL1A1	OCRIPLASMIN		ChemblInteractions
COL1A1	COL1A1	Definite	COL1A1	COLLAGENASE CLOSTRIDIUM HISTOLYTICUM		ChemblInteractions|TEND
NEK4	NEK4	Definite	NEK4	FOSTAMATINIB	inhibitor	DrugBank	26516587
CIT	CIT	Definite	CIT	FOSTAMATINIB	inhibitor	DrugBank	26516587
FLNA	FLNA	Definite	FLNA	ARTENIMOL	ligand	DrugBank	26340163
KCNC2	KCNC2	Definite	KCNC2	GUANIDINE HYDROCHLORIDE	blocker	ChemblInteractions
KCNC2	KCNC2	Definite	KCNC2	DALFAMPRIDINE	antagonist|blocker	DrugBank|ChemblInteractions	16472864
AREG	AREG	Definite	AREG	IRINOTECAN		PharmGKB	23959273
AREG	AREG	Definite	AREG	CRIZOTINIB			21791641
AREG	AREG	Definite	AREG	CETUXIMAB		PharmGKB	23959273|23374602
AREG	AREG	Definite	AREG	CAPECITABINE		PharmGKB	25026457
AREG	AREG	Definite	AREG	PANITUMUMAB		PharmGKB	23959273|26867820
WNK1	WNK1	Definite	WNK1	HYDROCHLOROTHIAZIDE		PharmGKB	18591455
TEAD1	TEAD1	Definite	TEAD1	DEXAMETHASONE		NCI	12207913
MTR	MTR	Definite	MTR	BENAZEPRIL		PharmGKB	15148588
MTR	MTR	Definite	MTR	MECOBALAMIN	cofactor	DrugBank	18491996
MTR	MTR	Definite	MTR	CYANOCOBALAMIN	cofactor	DrugBank	22254022|19904199|18709879
MTR	MTR	Definite	MTR	THIMEROSAL	antagonist	DrugBank
MTR	MTR	Definite	MTR	CISPLATIN		PharmGKB	21605004|29662106|19159907
MTR	MTR	Definite	MTR	METHIONINE	product of	DrugBank	17222188|16618098|17615995|16788729|17052662
MTR	MTR	Definite	MTR	HYDROXOCOBALAMIN	cofactor	DrugBank	18565|1744096|7599160|3812589|9587031
MTR	MTR	Definite	MTR	CARBOPLATIN		PharmGKB	21605004|29662106|19159907
PIK3C2A	PIK3C2A	Definite	PIK3C2A	COPANLISIB	inhibitor	MyCancerGenome
PIK3C2A	PIK3C2A	Definite	PIK3C2A	ALPELISIB	inhibitor	MyCancerGenome
ABL2	ABL2	Definite	ABL2	FOSTAMATINIB	inhibitor	DrugBank	26516587
ABL2	ABL2	Definite	ABL2	DASATINIB	multitarget	TdgClinicalTrial|DrugBank|TEND	20072833|25207766|11752352|17016423
ABL2	ABL2	Definite	ABL2	PONATINIB		DTC	20513156
SRSF1	SRSF1	Definite	SRSF1	COPPER		DrugBank	15359738
MINK1	MINK1	Definite	MINK1	SORAFENIB		DTC
MINK1	MINK1	Definite	MINK1	FOSTAMATINIB	inhibitor	DrugBank	26516587
MINK1	MINK1	Definite	MINK1	GEFITINIB		DTC
MINK1	MINK1	Definite	MINK1	ERLOTINIB		DTC
MINK1	MINK1	Definite	MINK1	DASATINIB		DTC
TRPC3	TRPC3	Definite	TRPC3	NORGESTIMATE	blocker	GuideToPharmacologyInteractions
ACTG1	ACTG1	Definite	ACTG1	ARTENIMOL	ligand	DrugBank	26340163
ACTG1	ACTG1	Definite	ACTG1	VINCRISTINE		PharmGKB
ACTG1	ACTG1	Definite	ACTG1	COPPER		DrugBank	14534351|15359738
COL1A2	COL1A2	Definite	COL1A2	OCRIPLASMIN		ChemblInteractions
COL1A2	COL1A2	Definite	COL1A2	COLLAGENASE CLOSTRIDIUM HISTOLYTICUM		ChemblInteractions|TEND
CBLC	CBLC	Definite	CBLC	OLAPARIB		JAX-CKB	25883215
PHB2	PHB2	Definite	PHB2	CAPSAICIN		DrugBank	19116139
HSPA5	HSPA5	Definite	HSPA5	COPPER		DrugBank	14534351|15359738
HSPA5	HSPA5	Definite	HSPA5	NORGESTREL		DTC
HSPA5	HSPA5	Definite	HSPA5	MIANSERIN		DTC
HSPA5	HSPA5	Definite	HSPA5	FLUOROURACIL			23456958
HSPA5	HSPA5	Definite	HSPA5	CHLORQUINALDOL		DTC
TUBB6	TUBB6	Definite	TUBB6	BRENTUXIMAB VEDOTIN	inhibitor	ChemblInteractions
TUBB6	TUBB6	Definite	TUBB6	PODOFILOX		DTC	17765552|24953821|21402478
TUBB6	TUBB6	Definite	TUBB6	ERIBULIN MESYLATE	inhibitor	ChemblInteractions
TUBB6	TUBB6	Definite	TUBB6	TRASTUZUMAB EMTANSINE	inhibitor	ChemblInteractions
TUBB6	TUBB6	Definite	TUBB6	VINCRISTINE		DTC	16539377|21664138|23916255
TUBB6	TUBB6	Definite	TUBB6	VINORELBINE		DTC	25768699
TUBB6	TUBB6	Definite	TUBB6	COLCHICINE	inhibitor	DTC|ChemblInteractions	23750455|25805446|24502232|25061803|25937236|24773591|25938266
TUBB6	TUBB6	Definite	TUBB6	CABAZITAXEL	inhibitor	ChemblInteractions
TUBB6	TUBB6	Definite	TUBB6	IXABEPILONE	inhibitor	ChemblInteractions
TUBB6	TUBB6	Definite	TUBB6	VINCRISTINE SULFATE	inhibitor	ChemblInteractions
TUBB6	TUBB6	Definite	TUBB6	VINFLUNINE	inhibitor	ChemblInteractions
TUBB6	TUBB6	Definite	TUBB6	PACLITAXEL	inhibitor	DTC|ChemblInteractions	23631389|25369367|25768699|24457094|22595423|23313639|17887662|23387901|19758808|23725535|24953821
TUBB6	TUBB6	Definite	TUBB6	DOCETAXEL	inhibitor	ChemblInteractions
TUBB6	TUBB6	Definite	TUBB6	VORINOSTAT		DTC	20491440
TUBB6	TUBB6	Definite	TUBB6	VINBLASTINE		DTC	23708010|23916255
TUBB6	TUBB6	Definite	TUBB6	VINORELBINE TARTRATE	inhibitor	ChemblInteractions
TUBB6	TUBB6	Definite	TUBB6	ARTENIMOL	ligand	DrugBank	26340163
TUBB6	TUBB6	Definite	TUBB6	VINBLASTINE SULFATE	inhibitor	ChemblInteractions
STIP1	STIP1	Definite	STIP1	COPPER		DrugBank	15359738
SLC9A3	SLC9A3	Definite	SLC9A3	ALBUMIN HUMAN		NCI	11251045|11698229
PDCD6	PDCD6	Definite	PDCD6	METHYLDOPA		DrugBank	18997320
PDCD6	PDCD6	Definite	PDCD6	CALCIUM		DrugBank	18997320
POLR3G	POLR3G	Definite	POLR3G	NEVIRAPINE		PharmGKB	21810746
PAK1	PAK1	Definite	PAK1	FOSTAMATINIB	inhibitor	DrugBank	26516587
PYGL	PYGL	Definite	PYGL	METHOTREXATE		PharmGKB	23007406
PYGL	PYGL	Definite	PYGL	ASPARAGINASE		PharmGKB	23007406
PYGL	PYGL	Definite	PYGL	DEXAMETHASONE		PharmGKB	23007406
MDH2	MDH2	Definite	MDH2	CISPLATIN		NCI	15225672
MDH2	MDH2	Definite	MDH2	XANTHINOL	cofactor	DrugBank	3936095
MDH2	MDH2	Definite	MDH2	ALBUMIN HUMAN		NCI	2932302
CLK1	CLK1	Definite	CLK1	FOSTAMATINIB	inhibitor	DrugBank	26516587
GLCCI1	GLCCI1	Definite	GLCCI1	BUDESONIDE		PharmGKB	21991891
GLCCI1	GLCCI1	Definite	GLCCI1	NEDOCROMIL		PharmGKB	21991891
GLCCI1	GLCCI1	Definite	GLCCI1	FLUNISOLIDE		PharmGKB	21991891
GLCCI1	GLCCI1	Definite	GLCCI1	TRIAMCINOLONE		PharmGKB	21991891
ME3	ME3	Definite	ME3	ASPIRIN		NCI	8611656
PSMD7	PSMD7	Definite	PSMD7	IXAZOMIB CITRATE	inhibitor	ChemblInteractions
PSMD7	PSMD7	Definite	PSMD7	CARFILZOMIB	inhibitor	DTC|MyCancerGenome|ChemblInteractions	24524217
PSMD7	PSMD7	Definite	PSMD7	BORTEZOMIB	inhibitor	DTC|MyCancerGenome|ChemblInteractions	24524217
RAD52	RAD52	Definite	RAD52	PROCHLORPERAZINE EDISYLATE		DTC
RAD52	RAD52	Definite	RAD52	CISPLATIN		PharmGKB	24533712
RAD52	RAD52	Definite	RAD52	CHLORPROMAZINE HYDROCHLORIDE		DTC
RAD52	RAD52	Definite	RAD52	PERPHENAZINE		DTC
RAD52	RAD52	Definite	RAD52	BENOXINATE HYDROCHLORIDE		DTC
RAD52	RAD52	Definite	RAD52	TRIFLUOPERAZINE		DTC
RAD52	RAD52	Definite	RAD52	IMATINIB MESYLATE		DTC
RAD52	RAD52	Definite	RAD52	CYCLOPHOSPHAMIDE		PharmGKB	24533712
RAD52	RAD52	Definite	RAD52	PANCURONIUM BROMIDE		DTC
RAD52	RAD52	Definite	RAD52	FENOLDOPAM MESYLATE		DTC
RAD52	RAD52	Definite	RAD52	CETYLPYRIDINIUM CHLORIDE		DTC
RAD52	RAD52	Definite	RAD52	MITOXANTRONE HYDROCHLORIDE		DTC
RAD52	RAD52	Definite	RAD52	MITOXANTRONE		DTC
CAMLG	CAMLG	Definite	CAMLG	CYCLOSPORINE	binder	TdgClinicalTrial|DrugBank	20602248|20927389|1502562|20637127|24682697|17139284|20674565|17016423
MDH1	MDH1	Definite	MDH1	ARTENIMOL	ligand	DrugBank	26340163
TAOK1	TAOK1	Definite	TAOK1	IMATINIB		DTC
TAOK1	TAOK1	Definite	TAOK1	SORAFENIB		DTC
TAOK1	TAOK1	Definite	TAOK1	FOSTAMATINIB	inhibitor	DrugBank	26516587
TAOK1	TAOK1	Definite	TAOK1	PALBOCICLIB		DTC
TAOK1	TAOK1	Definite	TAOK1	DASATINIB		DTC
TAOK1	TAOK1	Definite	TAOK1	PAZOPANIB		DTC
GJC1	GJC1	Definite	GJC1	CARBENOXOLONE	inhibitor	GuideToPharmacologyInteractions
NTSR1	NTSR1	Definite	NTSR1	SORAFENIB TOSYLATE		DTC
NTSR1	NTSR1	Definite	NTSR1	THIMEROSAL		DTC
CAPN1	CAPN1	Definite	CAPN1	BORTEZOMIB		DTC	20875739
GLRB	GLRB	Definite	GLRB	NIFEDIPINE	antagonist	GuideToPharmacologyInteractions
GLRB	GLRB	Definite	GLRB	ENFLURANE		ChemblInteractions
GLRB	GLRB	Definite	GLRB	ISOFLURANE		ChemblInteractions
GLRB	GLRB	Definite	GLRB	DESFLURANE		ChemblInteractions
GLRB	GLRB	Definite	GLRB	SEVOFLURANE		ChemblInteractions
GLRB	GLRB	Definite	GLRB	TROPISETRON	antagonist	GuideToPharmacologyInteractions
GLRB	GLRB	Definite	GLRB	HALOTHANE		ChemblInteractions
GLRB	GLRB	Definite	GLRB	LINDANE	antagonist	DrugBank	12614680|20600211
GLRB	GLRB	Definite	GLRB	TAURINE		TTD
GLRB	GLRB	Definite	GLRB	GLYCINE	ligand	DrugBank	16884688
NDUFS8	NDUFS8	Definite	NDUFS8	METFORMIN HYDROCHLORIDE	inhibitor	ChemblInteractions
JUND	JUND	Definite	JUND	CLOZAPINE		NCI	12093589
G6PD	G6PD	Definite	G6PD	OMEPRAZOLE		NCI	16570509
G6PD	G6PD	Definite	G6PD	ROPIVACAINE		PharmGKB|FDA
G6PD	G6PD	Definite	G6PD	EPINEPHRINE		FDA
G6PD	G6PD	Definite	G6PD	METOCLOPRAMIDE		PharmGKB|FDA
G6PD	G6PD	Definite	G6PD	PHENAZOPYRIDINE		PharmGKB	24372186|20701405|6125724|6410650
G6PD	G6PD	Definite	G6PD	RASBURICASE		PharmGKB|FDA	17387701|23989394|20196170|28370399|23209099|24787449|27119769|12075750|24372186|20701405|12942574|23860572|29290749|24750455|2019023|25988058|22573495|26033222|9369411|19654083|16204390|22190578|18561168|22015451|24915143|25115783
G6PD	G6PD	Definite	G6PD	SULFADIAZINE		PharmGKB|FDA	24372186
G6PD	G6PD	Definite	G6PD	PRILOCAINE		PharmGKB|FDA
G6PD	G6PD	Definite	G6PD	MEPIVACAINE		PharmGKB|FDA
G6PD	G6PD	Definite	G6PD	LIDOCAINE		FDA
G6PD	G6PD	Definite	G6PD	TRIMETHOPRIM		FDA
G6PD	G6PD	Definite	G6PD	CISPLATIN		NCI	15225672
G6PD	G6PD	Definite	G6PD	GLIMEPIRIDE		PharmGKB|FDA
G6PD	G6PD	Definite	G6PD	PEGLOTICASE		PharmGKB|FDA	26906307|25224415
G6PD	G6PD	Definite	G6PD	DAPSONE		PharmGKB|FDA	12387962|20599264|18349424|24372186|20701405|15183620
G6PD	G6PD	Definite	G6PD	PIOGLITAZONE		PharmGKB
G6PD	G6PD	Definite	G6PD	TRIAMCINOLONE		NCI	1197440
G6PD	G6PD	Definite	G6PD	DIAZEPAM		NCI	12020046
G6PD	G6PD	Definite	G6PD	PREDNISOLONE		NCI	16324786
G6PD	G6PD	Definite	G6PD	HYDROXYCHLOROQUINE		PharmGKB|FDA
G6PD	G6PD	Definite	G6PD	PROBENECID		FDA
G6PD	G6PD	Definite	G6PD	GLIPIZIDE		PharmGKB|FDA
G6PD	G6PD	Definite	G6PD	GLICLAZIDE		PharmGKB
G6PD	G6PD	Definite	G6PD	NIMESULIDE		NCI	12839301
G6PD	G6PD	Definite	G6PD	DABRAFENIB		CGI|PharmGKB|FDA
G6PD	G6PD	Definite	G6PD	MOXIFLOXACIN		PharmGKB
G6PD	G6PD	Definite	G6PD	NITROFURANTOIN		PharmGKB|FDA	5897424|20701405|12659|1669155
G6PD	G6PD	Definite	G6PD	CIPROFLOXACIN		PharmGKB	20127091
G6PD	G6PD	Definite	G6PD	DIMERCAPROL		PharmGKB	417891
G6PD	G6PD	Definite	G6PD	TAFENOQUINE		PharmGKB|FDA
G6PD	G6PD	Definite	G6PD	SULFAMETHOXAZOLE		FDA
G6PD	G6PD	Definite	G6PD	CHLOROPROCAINE		PharmGKB|FDA
G6PD	G6PD	Definite	G6PD	PENICILLIN G POTASSIUM		NCI	12530481
G6PD	G6PD	Definite	G6PD	DAUNORUBICIN		PharmGKB	8648264
G6PD	G6PD	Definite	G6PD	PRASTERONE		TTD
G6PD	G6PD	Definite	G6PD	SULFISOXAZOLE		FDA
G6PD	G6PD	Definite	G6PD	NICORANDIL		PharmGKB
G6PD	G6PD	Definite	G6PD	CHLOROQUINE		FDA
G6PD	G6PD	Definite	G6PD	AMODIAQUINE		PharmGKB
G6PD	G6PD	Definite	G6PD	TOLBUTAMIDE		PharmGKB|FDA
G6PD	G6PD	Definite	G6PD	PROPRANOLOL		NCI	10395986
G6PD	G6PD	Definite	G6PD	SUCCIMER		PharmGKB|FDA
G6PD	G6PD	Definite	G6PD	PRIMAQUINE		FDA
G6PD	G6PD	Definite	G6PD	QUININE		PharmGKB	407765
G6PD	G6PD	Definite	G6PD	ARTENIMOL	ligand	DrugBank	26340163
G6PD	G6PD	Definite	G6PD	OXYMETAZOLINE		FDA
G6PD	G6PD	Definite	G6PD	ERYTHROMYCIN		FDA
G6PD	G6PD	Definite	G6PD	BUSULFAN		NCI	2635153
G6PD	G6PD	Definite	G6PD	ARTESUNATE		PharmGKB
G6PD	G6PD	Definite	G6PD	SULFASALAZINE		PharmGKB|FDA	4386139
G6PD	G6PD	Definite	G6PD	DOXORUBICIN		PharmGKB	539595
G6PD	G6PD	Definite	G6PD	TRAMETINIB		PharmGKB|FDA
G6PD	G6PD	Definite	G6PD	MAFENIDE		PharmGKB|FDA	4722683
G6PD	G6PD	Definite	G6PD	OFLOXACIN		PharmGKB
G6PD	G6PD	Definite	G6PD	SULFANILAMIDE		PharmGKB	10793824
G6PD	G6PD	Definite	G6PD	GLYBURIDE		PharmGKB|FDA	21147013|20701405|15126005|8562390
G6PD	G6PD	Definite	G6PD	TETRACAINE		FDA
G6PD	G6PD	Definite	G6PD	TOLAZAMIDE		PharmGKB|FDA
G6PD	G6PD	Definite	G6PD	ARTICAINE		FDA
G6PD	G6PD	Definite	G6PD	NORFLOXACIN		PharmGKB
G6PD	G6PD	Definite	G6PD	FLUTAMIDE		PharmGKB|FDA
G6PD	G6PD	Definite	G6PD	CHLORPROPAMIDE		PharmGKB|FDA
G6PD	G6PD	Definite	G6PD	CEFTRIAXONE		PharmGKB|FDA
G6PD	G6PD	Definite	G6PD	CARMUSTINE		PharmGKB	539595
G6PD	G6PD	Definite	G6PD	PERINDOPRIL		PharmGKB
EEF2	EEF2	Definite	EEF2	MOXETUMOMAB PASUDOTOX	inactivator	DrugBank	22069564
EEF2	EEF2	Definite	EEF2	DENILEUKIN DIFTITOX	inhibitor	ChemblInteractions
EEF2	EEF2	Definite	EEF2	ESKETAMINE	inhibitor	DrugBank	29516301|29736744
SLC29A3	SLC29A3	Definite	SLC29A3	GEMCITABINE		PharmGKB
STK39	STK39	Definite	STK39	LOSARTAN		PharmGKB	21993215
STK39	STK39	Definite	STK39	FOSTAMATINIB	inhibitor	DrugBank	26516587
VASP	VASP	Definite	VASP	HYDROCHLOROTHIAZIDE		PharmGKB
PTGES	PTGES	Definite	PTGES	INDOMETHACIN		DTC	19053751
CSNK1E	CSNK1E	Definite	CSNK1E	DIACETYLMORPHINE		PharmGKB
AKT1	AKT1	Definite	AKT1	FLUOROURACIL		JAX-CKB	28860825
AKT1	AKT1	Definite	AKT1	IRINOTECAN			25714871
AKT1	AKT1	Definite	AKT1	CARBOPLATIN		PharmGKB	22901187
AKT1	AKT1	Definite	AKT1	LOVASTATIN		DTC	17472962
AKT1	AKT1	Definite	AKT1	TEMSIROLIMUS		JAX-CKB	27016228
AKT1	AKT1	Definite	AKT1	TRIFLUOPERAZINE		DTC	26372073
AKT1	AKT1	Definite	AKT1	DABRAFENIB			24265155
AKT1	AKT1	Definite	AKT1	SORAFENIB		JAX-CKB
AKT1	AKT1	Definite	AKT1	CISPLATIN		PharmGKB|JAX-CKB	28860825|22901187|25519148
AKT1	AKT1	Definite	AKT1	TOPOTECAN		DTC	21440338
AKT1	AKT1	Definite	AKT1	NELFINAVIR	inhibitor	TALC
AKT1	AKT1	Definite	AKT1	EVEROLIMUS	inhibitor	CGI|MyCancerGenomeClinicalTrial|JAX-CKB
AKT1	AKT1	Definite	AKT1	TRAMETINIB		JAX-CKB	30819666
AKT1	AKT1	Definite	AKT1	PALBOCICLIB		JAX-CKB	30819666
AKT1	AKT1	Definite	AKT1	CETUXIMAB			25714871
AKT1	AKT1	Definite	AKT1	SIROLIMUS		JAX-CKB	18708578
AKT1	AKT1	Definite	AKT1	PACLITAXEL		JAX-CKB	31841354
AKT1	AKT1	Definite	AKT1	ALPELISIB		JAX-CKB	27604488
AKT1	AKT1	Definite	AKT1	DOXORUBICIN		JAX-CKB	18708578
AKT1	AKT1	Definite	AKT1	GEMCITABINE		JAX-CKB
AKT1	AKT1	Definite	AKT1	VEMURAFENIB			24265152
AKT1	AKT1	Definite	AKT1	NINTEDANIB		DTC	18559524
AKT1	AKT1	Definite	AKT1	RISPERIDONE		PharmGKB	18855532
AKT1	AKT1	Definite	AKT1	FULVESTRANT		JAX-CKB	32220884
MAPK11	MAPK11	Definite	MAPK11	SORAFENIB		PharmGKB	20124951
MAPK11	MAPK11	Definite	MAPK11	PIRFENIDONE		TdgClinicalTrial
MAPK11	MAPK11	Definite	MAPK11	REGORAFENIB	inhibitor	DrugBank|ChemblInteractions|MyCancerGenomeClinicalTrial
FANCA	FANCA	Definite	FANCA	RUCAPARIB		JAX-CKB	32086346
FANCA	FANCA	Definite	FANCA	CISPLATIN		JAX-CKB	28864460
FANCA	FANCA	Definite	FANCA	OLAPARIB		CGI|JAX-CKB	31806540|28864460
NPY4R	NPY4R	Definite	NPY4R	NICLOSAMIDE	allosteric modulator	GuideToPharmacologyInteractions
ATP6V1A	ATP6V1A	Definite	ATP6V1A	ETIDRONIC ACID	inhibitor	DrugBank	8889850|21555003
SCD	SCD	Definite	SCD	CLOFIBRATE		NCI	11162472
SCD	SCD	Definite	SCD	COLCHICINE		NCI	6148915
JAG1	JAG1	Definite	JAG1	HYDROCORTISONE		NCI	11948681
SLC2A4	SLC2A4	Definite	SLC2A4	LIOTHYRONINE SODIUM		NCI	9217278
SLC2A4	SLC2A4	Definite	SLC2A4	COLCHICINE		NCI	16239226
SLC2A4	SLC2A4	Definite	SLC2A4	NEOMYCIN		NCI	15024008
SLC2A4	SLC2A4	Definite	SLC2A4	DIPYRIDAMOLE		NCI	1716731
SLC2A4	SLC2A4	Definite	SLC2A4	ETOPOSIDE PHOSPHATE		NCI	15496478
SLC2A4	SLC2A4	Definite	SLC2A4	CLOFIBRATE		NCI	8557642
SLC2A4	SLC2A4	Definite	SLC2A4	IRBESARTAN		NCI	18162196
SLC2A4	SLC2A4	Definite	SLC2A4	STREPTOZOCIN		NCI	10098523|9421368|2354749
SLC2A4	SLC2A4	Definite	SLC2A4	NYSTATIN		NCI	11593015
SLC2A4	SLC2A4	Definite	SLC2A4	INSULIN		NCI	8349045|7884509|9918825|8995390|11714021|17616136|8243832|2040701|16423895|17227768|17279354|16754199|10198313|14637133|15083319|11401844|9792680|10778531|17976658|1855475|12054114|1999488|11375332|15365619|10334307|12490950|9048628|9616209|15536229|1324860|8665891|8419118|9176187|7695642|9227455|17400720|8013658|12175706|17462778|9406133|11443199|9437239|17709177|2050674|7585807|12540375|1523532…
SLC2A4	SLC2A4	Definite	SLC2A4	SORBITOL		NCI	11879194
SLC2A4	SLC2A4	Definite	SLC2A4	PENICILLAMINE		NCI	17666490
SLC2A4	SLC2A4	Definite	SLC2A4	HALOPERIDOL		NCI	16002093
SLC2A4	SLC2A4	Definite	SLC2A4	MIRTAZAPINE		NCI	16002093
SLC2A4	SLC2A4	Definite	SLC2A4	DEXAMETHASONE		NCI	1587399
SLC2A4	SLC2A4	Definite	SLC2A4	INDOMETHACIN		NCI	8557642
SLC2A4	SLC2A4	Definite	SLC2A4	PRASTERONE		NCI	18349113
SLC2A4	SLC2A4	Definite	SLC2A4	GLYBURIDE		NCI	8224371
SLC2A4	SLC2A4	Definite	SLC2A4	ACETYLCYSTEINE		NCI	16713429
SLC2A4	SLC2A4	Definite	SLC2A4	ESTRADIOL		NCI	17068109
SLC2A4	SLC2A4	Definite	SLC2A4	PROGESTERONE		NCI	17068109
SLC2A4	SLC2A4	Definite	SLC2A4	ACARBOSE		NCI	12065205
SLC2A4	SLC2A4	Definite	SLC2A4	IMATINIB		NCI	16707477
SLC2A4	SLC2A4	Definite	SLC2A4	SOYBEAN OIL		NCI	10997602
SLC2A4	SLC2A4	Definite	SLC2A4	VERAPAMIL		NCI	8622594
SLC2A4	SLC2A4	Definite	SLC2A4	INDINAVIR		NCI	11916910
SLC2A4	SLC2A4	Definite	SLC2A4	EPINEPHRINE		NCI	12376414
SLC2A4	SLC2A4	Definite	SLC2A4	GLIPIZIDE		NCI	8043894
SLC2A4	SLC2A4	Definite	SLC2A4	PHENTOLAMINE		NCI	10381893
S100A4	S100A4	Definite	S100A4	COPPER		DrugBank	21924240
S100A4	S100A4	Definite	S100A4	DAUNORUBICIN HYDROCHLORIDE		DTC
S100A4	S100A4	Definite	S100A4	DOXORUBICIN HYDROCHLORIDE		DTC
S100A4	S100A4	Definite	S100A4	TRIFLUOPERAZINE	inhibitor	DrugBank	20421509|10592235
PRLR	PRLR	Definite	PRLR	FLUOXYMESTERONE	antagonist		17139284|17016423
PRLR	PRLR	Definite	PRLR	SOMATROPIN		TdgClinicalTrial
CACNG3	CACNG3	Definite	CACNG3	BEPRIDIL HYDROCHLORIDE	blocker	ChemblInteractions
CACNG3	CACNG3	Definite	CACNG3	PREGABALIN	modulator	ChemblInteractions
CACNG3	CACNG3	Definite	CACNG3	GABAPENTIN	modulator	ChemblInteractions
CACNG3	CACNG3	Definite	CACNG3	GABAPENTIN ENACARBIL	modulator	ChemblInteractions
EMP1	EMP1	Definite	EMP1	GEFITINIB		NCI	16087880
KCNH2	KCNH2	Definite	KCNH2	TRAZODONE HYDROCHLORIDE		DTC
KCNH2	KCNH2	Definite	KCNH2	TAMOXIFEN	inhibitor	DrugBank	15272206
KCNH2	KCNH2	Definite	KCNH2	LOXAPINE SUCCINATE		DTC
KCNH2	KCNH2	Definite	KCNH2	CHLORPHENIRAMINE MALEATE		DTC
KCNH2	KCNH2	Definite	KCNH2	FLUVOXAMINE		DrugBank	20071423
KCNH2	KCNH2	Definite	KCNH2	PROMAZINE HYDROCHLORIDE		DTC
KCNH2	KCNH2	Definite	KCNH2	HALOPERIDOL		DTC|PharmGKB	16278312
KCNH2	KCNH2	Definite	KCNH2	RISPERIDONE		DTC
KCNH2	KCNH2	Definite	KCNH2	ESTRADIOL		NCI	18440994
KCNH2	KCNH2	Definite	KCNH2	PYRILAMINE MALEATE		DTC
KCNH2	KCNH2	Definite	KCNH2	DESIPRAMINE HYDROCHLORIDE		DTC
KCNH2	KCNH2	Definite	KCNH2	HALOFANTRINE	blocker|inhibitor	DrugBank|GuideToPharmacologyInteractions	12176129|10952689
KCNH2	KCNH2	Definite	KCNH2	DEXBROMPHENIRAMINE MALEATE		DTC
KCNH2	KCNH2	Definite	KCNH2	GUANABENZ ACETATE		DTC
KCNH2	KCNH2	Definite	KCNH2	OXATOMIDE		DTC
KCNH2	KCNH2	Definite	KCNH2	GENTIAN VIOLET		DTC
KCNH2	KCNH2	Definite	KCNH2	CYPROHEPTADINE HYDROCHLORIDE		DTC
KCNH2	KCNH2	Definite	KCNH2	IMIPRAMINE	inhibitor	DrugBank	10510461
KCNH2	KCNH2	Definite	KCNH2	LOPERAMIDE HYDROCHLORIDE		DTC
KCNH2	KCNH2	Definite	KCNH2	RILUZOLE	blocker	GuideToPharmacologyInteractions
KCNH2	KCNH2	Definite	KCNH2	AMITRIPTYLINE	blocker	DrugBank	10510461|10742304
KCNH2	KCNH2	Definite	KCNH2	SOTALOL HYDROCHLORIDE		DTC
KCNH2	KCNH2	Definite	KCNH2	DOBUTAMINE HYDROCHLORIDE		DTC
KCNH2	KCNH2	Definite	KCNH2	IMIPRAMINE HYDROCHLORIDE		DTC
KCNH2	KCNH2	Definite	KCNH2	PROPAFENONE	inhibitor	TdgClinicalTrial|DrugBank|TEND|PharmGKB	11330342|12618228|16278312|11752352
KCNH2	KCNH2	Definite	KCNH2	PHENYTOIN	inhibitor	DrugBank	22678159
KCNH2	KCNH2	Definite	KCNH2	BENZTROPINE MESYLATE		DTC
KCNH2	KCNH2	Definite	KCNH2	SAQUINAVIR MESYLATE		DTC
KCNH2	KCNH2	Definite	KCNH2	HYDROXYZINE	inhibitor	DrugBank|PharmGKB	19057127|21892192
KCNH2	KCNH2	Definite	KCNH2	DROPERIDOL		PharmGKB	14999113
KCNH2	KCNH2	Definite	KCNH2	DISOPYRAMIDE	inhibitor|blocker	DTC|DrugBank|PharmGKB|GuideToPharmacologyInteractions	16842817|15272206
KCNH2	KCNH2	Definite	KCNH2	DOXAZOSIN MESYLATE		DTC
KCNH2	KCNH2	Definite	KCNH2	MOXIFLOXACIN		NCI|PharmGKB	16474415|16614168
KCNH2	KCNH2	Definite	KCNH2	QUINIDINE	inhibitor	DTC|DrugBank|PharmGKB	10028924|15821840|16842817|18582585|15673388|16041196|15125690
KCNH2	KCNH2	Definite	KCNH2	DOXEPIN	inhibitor	DrugBank|PharmGKB	17560554
KCNH2	KCNH2	Definite	KCNH2	FLUSPIRILENE		DTC
KCNH2	KCNH2	Definite	KCNH2	ECONAZOLE NITRATE		DTC
KCNH2	KCNH2	Definite	KCNH2	TELITHROMYCIN		PharmGKB	16614168|16278312
KCNH2	KCNH2	Definite	KCNH2	SALMETEROL XINAFOATE		DTC
KCNH2	KCNH2	Definite	KCNH2	RALOXIFENE HYDROCHLORIDE		DTC
KCNH2	KCNH2	Definite	KCNH2	AMIODARONE	inhibitor	TdgClinicalTrial|DrugBank|TEND|PharmGKB	14754422|18604229|11997281|11752352|14999113|18505444
KCNH2	KCNH2	Definite	KCNH2	BUSPIRONE HYDROCHLORIDE		DTC
KCNH2	KCNH2	Definite	KCNH2	PROBUCOL		PharmGKB	15043509
KCNH2	KCNH2	Definite	KCNH2	PHENTOLAMINE MESYLATE		DTC
KCNH2	KCNH2	Definite	KCNH2	AMSACRINE	inhibitor	DrugBank	15148258
KCNH2	KCNH2	Definite	KCNH2	NEFAZODONE	antagonist	DrugBank	24374264
KCNH2	KCNH2	Definite	KCNH2	FLUOXETINE HYDROCHLORIDE		DTC
KCNH2	KCNH2	Definite	KCNH2	NICARDIPINE HYDROCHLORIDE		DTC
KCNH2	KCNH2	Definite	KCNH2	ISAVUCONAZOLE	inhibitor	DrugBank	28074556
KCNH2	KCNH2	Definite	KCNH2	CITALOPRAM HYDROBROMIDE		DTC
KCNH2	KCNH2	Definite	KCNH2	CLOMIPRAMINE HYDROCHLORIDE		DTC
KCNH2	KCNH2	Definite	KCNH2	PROPOFOL		NCI	16368812
KCNH2	KCNH2	Definite	KCNH2	PIMOZIDE	inhibitor	DTC|DrugBank	11377395|11511086|11296551|10762666
KCNH2	KCNH2	Definite	KCNH2	MAPROTILINE HYDROCHLORIDE		DTC
KCNH2	KCNH2	Definite	KCNH2	CYCLOBENZAPRINE HYDROCHLORIDE		DTC
KCNH2	KCNH2	Definite	KCNH2	IDARUBICIN		DTC
KCNH2	KCNH2	Definite	KCNH2	MICONAZOLE	inhibitor		15778703|8760033
KCNH2	KCNH2	Definite	KCNH2	FLUNARIZINE HYDROCHLORIDE		DTC
KCNH2	KCNH2	Definite	KCNH2	CINNARIZINE		DTC
KCNH2	KCNH2	Definite	KCNH2	CHLORPROMAZINE HYDROCHLORIDE		DTC
[truncated: 1,296 more rows]

## Sheet: list of drug
FOSTAMATINIB
CISPLATIN
COPPER
PACLITAXEL
DASATINIB
ERLOTINIB
ARTENIMOL
SORAFENIB
FLUOROURACIL
GEMCITABINE
ALCOHOL
CARBOPLATIN
GEFITINIB
DOCETAXEL
IMATINIB
METHOTREXATE
DEXAMETHASONE
EVEROLIMUS
METHYLDOPA
PALBOCICLIB
PROGESTERONE
TAMOXIFEN
VANDETANIB
BEVACIZUMAB
HALOPERIDOL
IRINOTECAN
OLAPARIB
SIROLIMUS
TRAMETINIB
BORTEZOMIB
DOXORUBICIN
VINCRISTINE
CETUXIMAB
CLOZAPINE
COLCHICINE
CRIZOTINIB
DAUNORUBICIN
DAUNORUBICIN HYDROCHLORIDE
DOXORUBICIN HYDROCHLORIDE
HEXACHLOROPHENE
METFORMIN
NIFEDIPINE
PAZOPANIB
SIMVASTATIN
THIMEROSAL
TRETINOIN
VORINOSTAT
ATORVASTATIN
ETOPOSIDE
HYDROCHLOROTHIAZIDE
INSULIN
OLANZAPINE
PEMBROLIZUMAB
RUCAPARIB
ASPIRIN
BOSUTINIB
CAPECITABINE
CYCLOPHOSPHAMIDE
DIAZEPAM
DIPYRIDAMOLE
HYDROCORTISONE
INDOMETHACIN
LAPATINIB
MERCAPTOPURINE
METHYLPHENIDATE
MITOXANTRONE HYDROCHLORIDE
NINTEDANIB
PIMOZIDE
PONATINIB
REGORAFENIB
RIBAVIRIN
RISPERIDONE
TRIFLUOPERAZINE
VEMURAFENIB
VERAPAMIL
ALPELISIB
AZACITIDINE
CARFILZOMIB
CLOTRIMAZOLE
CYCLOSPORINE
EPIRUBICIN
HALOTHANE
LOVASTATIN
MIDAZOLAM
MIDOSTAURIN
NIVOLUMAB
OCRIPLASMIN
OXALIPLATIN
RALOXIFENE HYDROCHLORIDE
TEMOZOLOMIDE
TRASTUZUMAB
VINBLASTINE
ALPRAZOLAM
CAFFEINE
CARBAMAZEPINE
CHLORPROMAZINE
CLADRIBINE
DABRAFENIB
DEFEROXAMINE
DIGITOXIN
FENOFIBRATE
FLUTAMIDE
GLUTAMINE
GLYCINE
INAMRINONE
LEUCOVORIN
MELPHALAN
METFORMIN HYDROCHLORIDE
MITOXANTRONE
NICLOSAMIDE
PHENYTOIN
PRIMIDONE
PYRIMETHAMINE
SUNITINIB
TALAZOPARIB
TEMSIROLIMUS
THROMBIN
TOPOTECAN HYDROCHLORIDE
TRIAMCINOLONE
VINBLASTINE SULFATE
ACETAMINOPHEN
BICALUTAMIDE
BRIGATINIB
CHLORDIAZEPOXIDE
CHLORPROMAZINE HYDROCHLORIDE
CLOBAZAM
COPANLISIB
CYTARABINE
DECITABINE
DIGOXIN
ECONAZOLE NITRATE
EPOETIN ALFA
ESTAZOLAM
ESTRADIOL
FLUOXETINE
FLUSPIRILENE
IBRUTINIB
IDARUBICIN
IDARUBICIN HYDROCHLORIDE
ISOFLURANE
ISOPROTERENOL
IXAZOMIB CITRATE
LORATADINE
MELATONIN
MORPHINE
NITRAZEPAM
OXAZEPAM
PANITUMUMAB
PERPHENAZINE
PODOFILOX
PRASTERONE
PRAVASTATIN
PRAZEPAM
PROPOFOL
RILUZOLE
SERTRALINE
SERTRALINE HYDROCHLORIDE
STREPTOZOCIN
TACROLIMUS
TAMOXIFEN CITRATE
TENECTEPLASE
THEOPHYLLINE
THIOGUANINE
TOPIRAMATE
TRIAMTERENE
VENETOCLAX
VINORELBINE
VINORELBINE TARTRATE
WARFARIN
ABEMACICLIB
ACALABRUTINIB
ACAMPROSATE CALCIUM
ACETYLCYSTEINE
ACITRETIN
ACRIFLAVINE
ADEMETIONINE
AMIFOSTINE
AMOXAPINE
ATENOLOL
ATEZOLIZUMAB
AZATHIOPRINE
BENZBROMARONE
BINIMETINIB
BIOTIN
BROMAZEPAM
CABAZITAXEL
CABOZANTINIB
CEFTRIAXONE
CHLORAMBUCIL
CHLORHEXIDINE HYDROCHLORIDE
CITALOPRAM
CLOFIBRATE
CLONAZEPAM
CLORAZEPIC ACID
CLOTIAZEPAM
DACOMITINIB
DACTINOMYCIN
DESFLURANE
DISULFIRAM
DRONEDARONE
ENALAPRIL
ENCORAFENIB
ENFLURANE
EPINEPHRINE
ERYTHROMYCIN
FLECAINIDE
FLUPHENAZINE
FLURAZEPAM
GENTIAN VIOLET
GLYCERIN
HALAZEPAM
ISAVUCONAZOLE
IXABEPILONE
LIDOCAINE
LIOTHYRONINE SODIUM
LOPERAMIDE
LORAZEPAM
MECHLORETHAMINE HYDROCHLORIDE
MENADIONE
MEPROBAMATE
METHIMAZOLE
METHYLPREDNISOLONE
MIDAZOLAM HYDROCHLORIDE
NICOTINE
NIRAPARIB
NITROGLYCERIN
NORTRIPTYLINE HYDROCHLORIDE
OMEPRAZOLE
ORPHENADRINE HYDROCHLORIDE
OUABAIN
PAROXETINE
PAROXETINE HYDROCHLORIDE
PEMETREXED
PIOGLITAZONE
PROCHLORPERAZINE EDISYLATE
QUAZEPAM
QUINIDINE
REPAGLINIDE
ROMIDEPSIN
RUXOLITINIB
SEVOFLURANE
SODIUM CHLORIDE
SORAFENIB TOSYLATE
SULFASALAZINE
TANNIC ACID
TEMAZEPAM
TESTOSTERONE
THALIDOMIDE
THONZONIUM BROMIDE
TOPOTECAN
TRASTUZUMAB EMTANSINE
TRIFLUPROMAZINE HYDROCHLORIDE
VINCRISTINE SULFATE
ZAFIRLUKAST
ABIRATERONE
ADAPALENE
AFATINIB
ALBUMIN HUMAN
AMCINONIDE
AMITRIPTYLINE HYDROCHLORIDE
AMLEXANOX
ANISINDIONE
ARIPIPRAZOLE
ASPARAGINASE
AXITINIB
BENOXINATE HYDROCHLORIDE
BEPRIDIL
BEPRIDIL HYDROCHLORIDE
BIFONAZOLE
BRENTUXIMAB VEDOTIN
BUTABARBITAL SODIUM
BUTALBITAL
CALCITRIOL
CALCIUM
CARVEDILOL
CEFACLOR
CETRIMIDE
CHLORDIAZEPOXIDE HYDROCHLORIDE
CHLOROXINE
CICLOPIROX OLAMINE
CINNARIZINE
CIPROFLOXACIN
CLOMIPRAMINE HYDROCHLORIDE
CLORAZEPATE DIPOTASSIUM
COLLAGENASE CLOSTRIDIUM HISTOLYTICUM
CYANOCOBALAMIN
DALFAMPRIDINE
DENILEUKIN DIFTITOX
DESLANOSIDE
DIDANOSINE
DIMETHYL SULFOXIDE
DIPHENHYDRAMINE HYDROCHLORIDE
DISOPYRAMIDE PHOSPHATE
DOMIPHEN BROMIDE
DYCLONINE HYDROCHLORIDE
DYPHYLLINE
ERDAFITINIB
ERIBULIN MESYLATE
ERLOSAMIDE
ESTRONE
ESZOPICLONE
ETHCHLORVYNOL
ETHOPROPAZINE HYDROCHLORIDE
ETOMIDATE
EXEMESTANE
FINASTERIDE
FLUMAZENIL
FLUNISOLIDE
FLUOXETINE HYDROCHLORIDE
FLUVASTATIN
FULVESTRANT
GABAPENTIN
GABAPENTIN ENACARBIL
GENTAMICIN
GLIPIZIDE
GLUTETHIMIDE
GLYBURIDE
GUANIDINE HYDROCHLORIDE
IBUTILIDE
IMATINIB MESYLATE
IRBESARTAN
KETOCONAZOLE
LAMIVUDINE
LANSOPRAZOLE
LENALIDOMIDE
LENVATINIB
LEVODOPA
LINDANE
MAPROTILINE HYDROCHLORIDE
METHARBITAL
METHOHEXITAL SODIUM
METHYLENE BLUE
METHYPRYLON
MIFEPRISTONE
MINOCYCLINE
MIRTAZAPINE
MITOMYCIN
MITOTANE
MORICIZINE HYDROCHLORIDE
MOXIFLOXACIN
NALOXONE
NERATINIB
NEVIRAPINE
NILOTINIB
NINTEDANIB ESYLATE
ORPHENADRINE CITRATE
OSIMERTINIB MESYLATE
OXYTETRACYCLINE
OXYTOCIN
PENTOXIFYLLINE
PIRFENIDONE
PRAZOSIN
PREDNISOLONE
PREGABALIN
PRILOCAINE
PROCHLORPERAZINE
PROMETHAZINE
PROPAFENONE HYDROCHLORIDE
QUETIAPINE
RABEPRAZOLE SODIUM
RETINOL
RIBOCICLIB
SAFINAMIDE
SALMETEROL XINAFOATE
SINCALIDE
TALBUTAL
TAURINE
TERAZOSIN
TETRACAINE
THIAMYLAL SODIUM
THIOPENTAL SODIUM
TRICLOCARBAN
TRICLOFOS SODIUM
TRIFLURIDINE
TRYPAN BLUE
USTEKINUMAB
VASOPRESSIN
VINFLUNINE
XANTHINOL
ZONISAMIDE
ACENOCOUMAROL
ACETYLDIGITOXIN
ACYCLOVIR
AFATINIB DIMALEATE
AFLIBERCEPT
ALDESLEUKIN
ALTEPLASE
AMINOPHYLLINE
AMIODARONE HYDROCHLORIDE
AMITRIPTYLINE
AMSACRINE
ANASTROZOLE
APOMORPHINE
ARTICAINE HYDROCHLORIDE
ATALUREN
ATOSIBAN
AZELASTINE HYDROCHLORIDE
BACITRACIN
BASILIXIMAB
BENAZEPRIL
BENZALKONIUM CHLORIDE
BETAMETHASONE
BEXAROTENE
BLEOMYCIN
BLINATUMOMAB
BROMOCRIPTINE
BUMETANIDE
BUSULFAN
CANAGLIFLOZIN
CANDESARTAN CILEXETIL
CANTHARIDIN
CARBETOCIN
CEFIXIME
CERITINIB
CERULETIDE
CHENODIOL
CHLOROPROCAINE
CHLOROPROCAINE HYDROCHLORIDE
CHLORPROPAMIDE
CHLORQUINALDOL
CHOLECALCIFEROL
CITALOPRAM HYDROBROMIDE
CLARITHROMYCIN
CLOMIPRAMINE
COBIMETINIB
COCAINE
CRISABOROLE
DACARBAZINE
DACLIZUMAB
DAPSONE
DEFERASIROX
DESMOPRESSIN
DESOXIMETASONE
DEXIBUPROFEN
DEXRAZOXANE
DIACETYLMORPHINE
DICLOFENAC
DICLOFENAC SODIUM
DOFETILIDE
DOPAMINE
DOXEPIN
DOXYCYCLINE
DRONEDARONE HYDROCHLORIDE
DULOXETINE HYDROCHLORIDE
EFAVIRENZ
ENZALUTAMIDE
EPINEPHRINE BITARTRATE
EPIRUBICIN HYDROCHLORIDE
ESCITALOPRAM
ESKETAMINE
ESLICARBAZEPINE
ESLICARBAZEPINE ACETATE
ESTRADIOL VALERATE
ETHACRYNIC ACID
ETHINYL ESTRADIOL
ETHOTOIN
ETIDOCAINE HYDROCHLORIDE
ETOPOSIDE PHOSPHATE
EZETIMIBE
FENTANYL
FINGOLIMOD HYDROCHLORIDE
FISH OIL TRIGLYCERIDES
FLAVOXATE HYDROCHLORIDE
FLOXURIDINE
FLUFENAMIC ACID
FLUOCINONIDE
FLUOROMETHOLONE
FLUOXYMESTERONE
FLURANDRENOLIDE
FLUVOXAMINE
FORMESTANE
FOSPHENYTOIN SODIUM
GLICLAZIDE
GLIMEPIRIDE
HEXYLCAINE HYDROCHLORIDE
HEXYLRESORCINOL
HISTAMINE
HYDRALAZINE
HYDROQUINONE
HYDROXOCOBALAMIN
HYDROXYCHLOROQUINE
HYDROXYUREA
IBUPROFEN
ICATIBANT
IDEBENONE
IDURSULFASE
IFOSFAMIDE
ILOPROST
IMIPRAMINE HYDROCHLORIDE
INDECAINIDE HYDROCHLORIDE
IRINOTECAN HYDROCHLORIDE
ISOCONAZOLE
ISONIAZID
ISOSORBIDE MONONITRATE
ISOTRETINOIN
KETAZOLAM
LAMOTRIGINE
LANATOSIDE C
LAPATINIB DITOSYLATE
LEVETIRACETAM
LEVONORDEFRIN
LIDOCAINE HYDROCHLORIDE
LIDOFLAZINE
LOMUSTINE
LOPERAMIDE HYDROCHLORIDE
MEDRYSONE
MENADIOL SODIUM DIPHOSPHATE
MEPHENYTOIN
MEPIVACAINE
MEPIVACAINE HYDROCHLORIDE
MERETHOXYLLINE PROCAINE
METERGOLINE
METHACYCLINE HYDROCHLORIDE
METHADONE
METHIONINE
METOCLOPRAMIDE
MEXILETINE HYDROCHLORIDE
MIANSERIN
MICONAZOLE
MICONAZOLE NITRATE
MILRINONE
MOMETASONE FUROATE
MYCOPHENOLATE MOFETIL
MYCOPHENOLIC ACID
NEFAZODONE
NEFAZODONE HYDROCHLORIDE
NETARSUDIL
NICARDIPINE
NICARDIPINE HYDROCHLORIDE
NICORANDIL
NIMESULIDE
NITAZOXANIDE
NITROFURANTOIN
NITROPRUSSIDE
NORFLOXACIN
NORGESTIMATE
NORGESTREL
NORTRIPTYLINE
OFLOXACIN
OMACETAXINE MEPESUCCINATE
ORLISTAT
OSIMERTINIB
OXATOMIDE
OXCARBAZEPINE
OXTRIPHYLLINE
OXYBATE
OXYBENZONE
PALIFERMIN
PAPAVERINE HYDROCHLORIDE
PAZOPANIB HYDROCHLORIDE
PERTUZUMAB
PEXIDARTINIB
PHENACEMIDE
PHENAZOPYRIDINE
PHENAZOPYRIDINE HYDROCHLORIDE
PHENOXYBENZAMINE HYDROCHLORIDE
PHENTOLAMINE
PHENYLEPHRINE
PHENYTOIN SODIUM
PIRETANIDE
PITOLISANT
PRILOCAINE HYDROCHLORIDE
PRIMAQUINE
PROBENECID
PROCAINAMIDE HYDROCHLORIDE
PROCAINE HYDROCHLORIDE
PROCARBAZINE
PROFLAVINE
PROMAZINE HYDROCHLORIDE
PROMETHAZINE HYDROCHLORIDE
PROPAFENONE
PROPARACAINE HYDROCHLORIDE
PROPOXYCAINE HYDROCHLORIDE
PROPRANOLOL
PROPYLTHIOURACIL
PROTRIPTYLINE HYDROCHLORIDE
PYROGALLOL
QUINIDINE GLUCONATE
QUINIDINE POLYGALACTURONATE
QUINIDINE SULFATE
RALOXIFENE
RALTITREXED
RAMUCIRUMAB
RASBURICASE
RITUXIMAB
ROPIVACAINE
ROPIVACAINE HYDROCHLORIDE
RUCAPARIB CAMSYLATE
RUFINAMIDE
SAQUINAVIR MESYLATE
SOTALOL
SOYBEAN OIL
SULFISOXAZOLE
SULINDAC
TALAZOPARIB TOSYLATE
TEGAFUR
TELITHROMYCIN
TESTOSTERONE PROPIONATE
TETRACAINE HYDROCHLORIDE
THEOPHYLLINE SODIUM GLYCINATE
THYROTROPIN
TICAGRELOR
TIVOZANIB
TIZANIDINE
TOCAINIDE HYDROCHLORIDE
TOFACITINIB
TOLAZAMIDE
TOLBUTAMIDE
TOLVAPTAN
TRAZODONE HYDROCHLORIDE
TRIMETREXATE
TROMETHAMINE
TROPISETRON
UREA
VALRUBICIN
VERNAKALANT
ZALCITABINE
ABACAVIR
ACAMPROSATE
ACARBOSE
ACETOHEXAMIDE
ACETOPHENAZINE
ADENOSINE
ALBENDAZOLE
ALBUTEROL
ALCLOMETASONE DIPROPIONATE
ALECTINIB
ALFACALCIDOL
ALFUZOSIN
ALITRETINOIN
ALLOPURINOL
ALOSETRON HYDROCHLORIDE
ALPROSTADIL
AMANTADINE
AMANTADINE HYDROCHLORIDE
AMDINOCILLIN
AMILORIDE
AMIODARONE
AMISULPRIDE
AMLODIPINE
AMLODIPINE BESYLATE
AMODIAQUINE
AMOROLFINE
AMPICILLIN
AMYLMETACRESOL
ANAGRELIDE
ANAGRELIDE HYDROCHLORIDE
ANAKINRA
APALUTAMIDE
APREMILAST
ARGATROBAN
ARTEMISININ
ARTESUNATE
ARTICAINE
ATAZANAVIR
ATOMOXETINE HYDROCHLORIDE
ATRACURIUM BESYLATE
ATROPINE
AVATROMBOPAG
BACLOFEN
BARICITINIB
BECAPLERMIN
BECLOMETHASONE DIPROPIONATE
BELINOSTAT
BENAZEPRIL HYDROCHLORIDE
BENORILATE
BENZTHIAZIDE
BENZTROPINE MESYLATE
BENZYLPENICILLIN
BETAMETHASONE DIPROPIONATE
BETAMETHASONE SODIUM PHOSPHATE
BETAMETHASONE VALERATE
BISACODYL
BIVALIRUDIN
BOCEPREVIR
BRIVARACETAM
BROMOCRIPTINE MESYLATE
BUDESONIDE
BUPIVACAINE
BUPRENORPHINE HYDROCHLORIDE
BUPROPION
BUPROPION HYDROCHLORIDE
BUSPIRONE HYDROCHLORIDE
CALCIFEDIOL
CALCIPOTRIENE
CALCITONIN
CANNABIDIOL
CANRENOATE POTASSIUM
CAPSAICIN
CARBACHOL
CARBARIL
CARBENOXOLONE
CARBIDOPA
CARMUSTINE
CATUMAXOMAB
CEFADROXIL
CEFAMANDOLE
CEFDINIR
CEFMETAZOLE
CEFONICID SODIUM
CEFOPERAZONE
CEFOTAXIME
CEFOTETAN
CEFOTIAM HYDROCHLORIDE
CEFOXITIN
CEFOXITIN SODIUM
CEFPODOXIME PROXETIL
CEFUROXIME
CEMIPLIMAB
CENEGERMIN
CEPHALEXIN
CEPHALOTHIN SODIUM
CEPHAPIRIN SODIUM
CEPHRADINE
CERULETIDE DIETHYLAMINE
CETIRIZINE
CETIRIZINE HYDROCHLORIDE
CETYLPYRIDINIUM CHLORIDE
CHLORAMPHENICOL PALMITATE
CHLOROBUTANOL
CHLOROGUANIDE
CHLOROQUINE
CHLOROTRIANISENE
CHLORPHENIRAMINE MALEATE
CHLORTETRACYCLINE HYDROCHLORIDE
CHOLESTYRAMINE
CICLESONIDE
CILOSTAZOL
CIMETIDINE
CIPROFIBRATE
CLEMASTINE
CLEVIDIPINE
CLOBETASOL PROPIONATE
CLOCORTOLONE PIVALATE
CLOFARABINE
CLOPIDOGREL
CODEINE
CONIVAPTAN
CONIVAPTAN HYDROCHLORIDE
CORTICOTROPIN
CROMOLYN SODIUM
CUPRIC CHLORIDE
CYCLANDELATE
CYCLOBENZAPRINE HYDROCHLORIDE
CYCLOGUANIL
CYCLOSERINE
CYPROHEPTADINE HYDROCHLORIDE
CYPROTERONE ACETATE
CYSTEINE
CYSTINE
DABIGATRAN ETEXILATE MESYLATE
DANAZOL
DANTROLENE
DANTROLENE SODIUM
DAPAGLIFLOZIN
DAPAGLIFLOZIN PROPYLENE GLYCOL
DARATUMUMAB
DAROLUTAMIDE
DAUNORUBICIN CITRATE
DEFERIPRONE
DEFLAZACORT
DELAVIRDINE
DEMECLOCYCLINE HYDROCHLORIDE
DEQUALINIUM
DEQUALINIUM CHLORIDE
DESERPIDINE
DESIPRAMINE HYDROCHLORIDE
DESIRUDIN
DESMOPRESSIN ACETATE
DESOGESTREL
DESONIDE
DESOXYCORTICOSTERONE ACETATE
DESOXYCORTICOSTERONE PIVALATE
DESVENLAFAXINE
DESVENLAFAXINE SUCCINATE
DEXBROMPHENIRAMINE MALEATE
DEXTROMETHORPHAN
DIACEREIN
DIAZOXIDE
DIBUCAINE
DICUMAROL
DIENESTROL
DIENOGEST
DIETHYLCARBAMAZINE CITRATE
DIFLORASONE DIACETATE
DIFLUPREDNATE
DILTIAZEM
DIMERCAPROL
DINOPROSTONE
DINUTUXIMAB
DIPHENOXYLATE HYDROCHLORIDE
DISOPYRAMIDE
DOBUTAMINE
DOBUTAMINE HYDROCHLORIDE
DOCUSATE
DOCUSATE SODIUM
DOMPERIDONE
DOXAZOSIN
DOXAZOSIN MESYLATE
DROMOSTANOLONE PROPIONATE
DRONABINOL
DROPERIDOL
DROSPIRENONE
DULOXETINE
DUPILUMAB
DURVALUMAB
DUTASTERIDE
DUVELISIB
DYDROGESTERONE
ECULIZUMAB
EFLORNITHINE
EFLORNITHINE HYDROCHLORIDE
ELIGLUSTAT
ELIGLUSTAT TARTRATE
EMAPALUMAB
EMPAGLIFLOZIN
EMTRICITABINE
ENOXACIN
ENOXIMONE
EPOETIN BETA
EPOPROSTENOL
ERGOCALCIFEROL
ERGONOVINE
ERIBULIN
ERLOTINIB HYDROCHLORIDE
ERTUGLIFLOZIN
ESCITALOPRAM OXALATE
ESKETAMINE HYDROCHLORIDE
ESTRADIOL BENZOATE
ESTRADIOL CYPIONATE
ESTRAMUSTINE PHOSPHATE
ESTRAMUSTINE PHOSPHATE SODIUM
ESTRIOL
ETANERCEPT
ETEPLIRSEN
ETHAMSYLATE
ETHOSUXIMIDE
ETHYLESTRENOL
ETHYNODIOL DIACETATE
ETIDRONIC ACID
ETONOGESTREL
ETRAVIRINE
EVANS BLUE
FAMOTIDINE
FEBUXOSTAT
FELBAMATE
FELODIPINE
FENOLDOPAM MESYLATE
FEXOFENADINE HYDROCHLORIDE
FILGRASTIM
FINAFLOXACIN
FINGOLIMOD
FLECAINIDE ACETATE
FLUCONAZOLE
FLUCYTOSINE
FLUNARIZINE
FLUNARIZINE HYDROCHLORIDE
FLUOCINOLONE ACETONIDE
FLUORESCEIN
FLUPHENAZINE HYDROCHLORIDE
FLUPREDNISOLONE
FLURBIPROFEN
FLUVOXAMINE MALEATE
FOLIC ACID
FOSPROPOFOL
FURAZOLIDONE
FUROSEMIDE
GALANTAMINE HYDROBROMIDE
GALSULFASE
GANCICLOVIR
GEMCITABINE HYDROCHLORIDE
GEMFIBROZIL
GESTRINONE
GILTERITINIB
GLIQUIDONE
GLUCAGON
GRANISETRON
GRISEOFULVIN
GUANABENZ ACETATE
GUANIDINE
HALCINONIDE
HALOBETASOL PROPIONATE
HALOFANTRINE
HALOFANTRINE HYDROCHLORIDE
HALOPROGIN
HOMATROPINE HYDROBROMIDE
HYALURONIDASE
HYDRALAZINE HYDROCHLORIDE
HYDROCORTISONE BUTYRATE
HYDROCORTISONE PROBUTATE
HYDROCORTISONE SODIUM PHOSPHATE
HYDROCORTISONE SODIUM SUCCINATE
HYDROCORTISONE VALERATE
HYDROXYZINE
HYDROXYZINE PAMOATE
ICATIBANT ACETATE
IDELALISIB
IDOXURIDINE
IFENPRODIL
IMIDAPRIL
IMIPRAMINE
INAMRINONE LACTATE
INDINAVIR
INDINAVIR SULFATE
INDOCYANINE GREEN
INFLIXIMAB
INTERFERON ALFA-2A
INTERFERON ALFA-2B
INTERFERON ALFA-N3
INTERFERON ALFACON-1
INTERFERON BETA-1A
INTERFERON BETA-1B
INTERFERON GAMMA-1B
IOPAMIDOL
ISOETHARINE MESYLATE
ISOSORBIDE DINITRATE
IVABRADINE
IVERMECTIN
IVOSIDENIB
KETAMINE
KETAMINE HYDROCHLORIDE
KETANSERIN
KETOPROFEN
KETOROLAC TROMETHAMINE
LACTIC ACID
LAROTRECTINIB
LEFLUNOMIDE
LENVATINIB MESYLATE
LEPIRUDIN
LERCANIDIPINE HYDROCHLORIDE
LETROZOLE
LEVOCARNITINE
LEVOFLOXACIN
LEVOMEPROMAZINE MALEATE
LEVOMILNACIPRAN HYDROCHLORIDE
LEVONORGESTREL
LISINOPRIL
LOFEPRAMINE HYDROCHLORIDE
LOMEFLOXACIN
LOMITAPIDE
LOMITAPIDE MESYLATE
LORACARBEF
LORLATINIB
LOSARTAN
LOTEPREDNOL ETABONATE
LOXAPINE
LOXAPINE SUCCINATE
LULICONAZOLE
LUSUTROMBOPAG
LYPRESSIN
MAFENIDE
MAPROTILINE
MASOPROCOL
MAZINDOL
MEBENDAZOLE
MEBEVERINE HYDROCHLORIDE
MECASERMIN
MECASERMIN RINFABATE
MECOBALAMIN
MEDROXYPROGESTERONE ACETATE
MEFENAMIC ACID
MEFLOQUINE HYDROCHLORIDE
MEGESTROL ACETATE
MELOXICAM
MEMANTINE
MEMANTINE HYDROCHLORIDE
MEPERIDINE
MEPHOBARBITAL
MEPREDNISONE
MESALAMINE
MESTRANOL
METHIXENE HYDROCHLORIDE
METHYLPREDNISOLONE ACETATE
METHYLPREDNISOLONE SODIUM SUCCINATE
METHYLTESTOSTERONE
METILDIGOXIN
METOPROLOL
MEZLOCILLIN
MIANSERIN HYDROCHLORIDE
MIGLUSTAT
MILRINONE LACTATE
MINOCYCLINE HYDROCHLORIDE
MINOXIDIL
MIPOMERSEN
MITOBRONITOL
MOCLOBEMIDE
MOLSIDOMINE
MONTELUKAST
MOXETUMOMAB PASUDOTOX
MOXONIDINE
MUROMONAB-CD3
MYCOPHENOLATE MOFETIL HYDROCHLORIDE
NALIDIXIC ACID
NANDROLONE DECANOATE
NANDROLONE PHENPROPIONATE
NAPROXEN SODIUM
NATALIZUMAB
NATEGLINIDE
NECITUMUMAB
NEDOCROMIL
NELFINAVIR
NELFINAVIR MESYLATE
NEOMYCIN
NESIRITIDE
NETARSUDIL DIMESYLATE
NIACIN
NIACINAMIDE
NIFUROXAZIDE
NILOTINIB HYDROCHLORIDE MONOHYDRATE
NILUTAMIDE
NISOLDIPINE
NITRENDIPINE
NITRIC OXIDE
NORELGESTROMIN
NOREPINEPHRINE BITARTRATE
NORETHINDRONE
NORETHINDRONE ACETATE
NORETHYNODREL
NOSCAPINE
NYSTATIN
OCTOCRYLENE
OCTREOTIDE
OLSALAZINE
OPRELVEKIN
OXACILLIN
OXANDROLONE
OXIGLUTATIONE
OXITRIPTAN
OXYBUTYNIN CHLORIDE
OXYMETAZOLINE
OXYMETAZOLINE HYDROCHLORIDE
OXYMETHOLONE
PALIPERIDONE
PANCURONIUM BROMIDE
PANOBINOSTAT
PARAMETHASONE ACETATE
PAROXETINE MESYLATE
PEFLOXACIN
PEGINTERFERON ALFA-2A
PEGINTERFERON ALFA-2B
PEGINTERFERON BETA-1A
PEGLOTICASE
PENCICLOVIR
PENICILLAMINE
PENICILLIN G POTASSIUM
PENICILLIN V
PENTAGASTRIN
PENTAMIDINE ISETHIONATE
PENTETIC ACID
PENTOSAN POLYSULFATE SODIUM
PERICIAZINE
PERINDOPRIL
PERMETHRIN
PHENELZINE SULFATE
PHENIRAMINE
PHENOBARBITAL
PHENOLPHTHALEIN
PHENOXYBENZAMINE
PHENPROCOUMON
PHENTOLAMINE MESYLATE
PHENYLBUTANOIC ACID
PHTHALYLSULFATHIAZOLE
PHYTONADIONE
PIMECROLIMUS
PINACIDIL
PIPERAZINE
PIROXICAM
PITAVASTATIN CALCIUM
PLECANATIDE
PLERIXAFOR
PLICAMYCIN
POLIDOCANOL
PONATINIB HYDROCHLORIDE
PRALATREXATE
PRAMLINTIDE
PRAMOXINE
PRASUGREL
PREDNICARBATE
PREDNISOLONE ACETATE
PREDNISONE
PRIMAQUINE PHOSPHATE
PROBUCOL
PROCAINAMIDE
PROCAINE
PROMAZINE
PROPOXYCAINE
PSEUDOEPHEDRINE
PYRANTEL PAMOATE
PYRIDOSTIGMINE BROMIDE
PYRILAMINE
PYRILAMINE MALEATE
PYRITHIONE
PYRVINIUM PAMOATE
QUINAPRIL
QUINAPRIL HYDROCHLORIDE
QUINESTROL
QUININE
QUININE SULFATE
RAMIPRIL
RANIBIZUMAB
RANITIDINE
RANOLAZINE
RIBOFLAVIN
RIFABUTIN
RIFAMPIN
RIFAMYCIN SODIUM
RIFAPENTINE
RILONACEPT
RIOCIGUAT
RISANKIZUMAB
RITONAVIR
ROCURONIUM BROMIDE
ROFLUMILAST
ROMIPLOSTIM
ROPINIROLE HYDROCHLORIDE
ROSUVASTATIN
ROXITHROMYCIN
RUXOLITINIB PHOSPHATE
SALMETEROL
SAQUINAVIR
SERTACONAZOLE NITRATE
SIPONIMOD
SODIUM NITROPRUSSIDE
SODIUM OXYBATE
SOMATREM
SOMATROPIN
SONIDEGIB
SORBITOL
SOTALOL HYDROCHLORIDE
SPIRONOLACTONE
STANOZOLOL
STAVUDINE
SUCCIMER
SUCRALFATE
SULCONAZOLE NITRATE
SULFADIAZINE
SULFAMETHOXAZOLE
SULFANILAMIDE
SULPIRIDE
SUNITINIB MALATE
TACRINE
TADALAFIL
TAFENOQUINE
TAMSULOSIN HYDROCHLORIDE
TAZAROTENE
TAZOBACTAM SODIUM
TEDUGLUTIDE
TELAPREVIR
TELMISARTAN
TENIPOSIDE
TENOXICAM
TERLIPRESSIN
TESTOLACTONE
TESTOSTERONE CYPIONATE
TESTOSTERONE ENANTHATE
TESTOSTERONE UNDECANOATE
THIABENDAZOLE
THIAMYLAL
THIOCTIC ACID
THIOPENTAL
THIOTEPA
THIOTHIXENE
THONZONIUM
TIBOLONE
TICLOPIDINE
TILDRAKIZUMAB
TIOCONAZOLE
TIPIRACIL
TOFACITINIB CITRATE
TOLBUTAMIDE SODIUM, STERILE
TOLFENAMIC ACID
TOREMIFENE
TOREMIFENE CITRATE
TRIAMCINOLONE ACETONIDE
TRIAMCINOLONE DIACETATE
TRICLABENDAZOLE
TRICLOSAN
TRIFLUPROMAZINE
TRILOSTANE
TRIMETHOPRIM
ULIPRISTAL
UNOPROSTONE ISOPROPYL
UROKINASE
VASOPRESSIN TANNATE
VENLAFAXINE
VENLAFAXINE HYDROCHLORIDE
VERAPAMIL HYDROCHLORIDE
VERTEPORFIN
VIGABATRIN
VILAZODONE HYDROCHLORIDE
VINPOCETINE
VORTIOXETINE HYDROBROMIDE
WARFARIN POTASSIUM
YOHIMBINE HYDROCHLORIDE
ZALEPLON
ZICONOTIDE
ZICONOTIDE ACETATE
ZIDOVUDINE
ZIPRASIDONE
ZOLPIDEM

## Sheet: Genes-number of targeting drugs
Gene	Number
AR	315
KCNH2	118
TP53	110
IDH1	87
ERBB2	72
G6PD	65
SCN1A	64
EGFR	62
BAZ2B	52
SCN11A	52
GABRB1	50
GABRB3	50
HTT	48
GABRE	47
HIF1A	44
PTEN	41
USP1	40
TOP2A	32
FGFR1	31
ABL1	30
SLC2A4	29
MAPK1	26
BIRC5	25
KCNJ11	25
MTHFR	25
AKT1	24
ABCC3	23
GRIN2B	23
HSPA4	23
JUN	23
TGFB1	22
MYC	21
IL2RA	20
PLK1	19
TUBB4B	19
FLT1	18
GABRR2	18
TUBB6	18
CALM1	17
SRC	17
TARDBP	17
TUBB2A	17
NF1	16
PDE3A	16
PDE4A	16
ALOX15	15
CDKN1A	15
F2	15
KMT2A	15
APOB	14
FGF2	14
RAF1	14
RARA	14
HRH4	13
RAD52	13
AVPR1A	12
CACNA1B	12
ERBB3	12
FAAH	12
JAK2	12
KCNA5	12
MAPK8	12
ARID1A	11
FKBP5	11
LYN	11
STK11	11
ANPEP	10
FGFR4	10
GLRB	10
IGF1R	10
NF2	10
PLA2G4A	10
ATRX	9
CYB5R3	9
ETV6	9
IFNAR2	9
OXTR	9
PARP1	9
SLC15A1	9
SLC19A1	9
SLC29A1	9
FRK	8
GUCY1A2	8
IGF2	8
MTR	8
SH2B1	8
TBXA2R	8
CCKBR	7
GNAS	7
PIK3R2	7
SLC2A1	7
STAG2	7
TPM3	7
A2M	6
ATP1A2	6
AURKA	6
BDKRB2	6
CALR	6
CBL	6
CDK2	6
COL18A1	6
FASN	6
GAPDH	6
GNA11	6
IL12B	6
IMPDH2	6
KCNJ6	6
LIPC	6
PARP2	6
PDF	6
RACGAP1	6
ROCK2	6
SHMT1	6
SLC5A2	6
SOAT1	6
STAT3	6
TAOK1	6
AREG	5
ATP7A	5
BRD4	5
CBFB	5
CFH	5
EPHA2	5
F2RL1	5
FANCC	5
GGCX	5
GNAQ	5
HSP90AB1	5
HSPA5	5
MINK1	5
P4HB	5
PDE7A	5
SLC7A11	5
SLK	5
SOD2	5
TCF7L2	5
WT1	5
ADM	4
APOA5	4
ATP1B3	4
CACNG3	4
CACNG7	4
CDH1	4
CDK12	4
CFLAR	4
CLK4	4
CREB1	4
FOLR1	4
GABBR1	4
GLCCI1	4
IL2RB	4
ITPA	4
KIF6	4
MKNK2	4
NPR1	4
PEAR1	4
S100A4	4
SIK2	4
SLC47A1	4
SMAD2	4
SRP19	4
UMPS	4
ABCC6	3
ABL2	3
ACTG1	3
APAF1	3
BCL2L2	3
BCOR	3
BRD2	3
C3	3
CBS	3
CCKAR	3
CCND2	3
CCND3	3
CD3E	3
CMPK1	3
CSK	3
CYP27B1	3
DLG4	3
DUSP1	3
DYRK1A	3
EEF2	3
EPHB4	3
FANCA	3
IL1A	3
IL1R1	3
ITPR1	3
MAPK11	3
MAPK13	3
MDH2	3
ODC1	3
PGRMC1	3
PKN2	3
PPP3CA	3
PRKCD	3
PRKD3	3
PRRC2A	3
PSMB2	3
PSMB4	3
PSMC4	3
PSMD11	3
PSMD7	3
PYGL	3
RFK	3
RPS6KA3	3
RYR3	3
S1PR3	3
SREBF1	3
SUMO1	3
TET2	3
TGFBR2	3
TK1	3
UBE2N	3
UCP2	3
UGCG	3
VEGFB	3
VEGFC	3
XRCC5	3
ACACB	2
ACTB	2
ADCYAP1	2
AKT2	2
AMD1	2
APOC3	2
ARID5B	2
CAPN10	2
CD38	2
CD3EAP	2
COL1A1	2
COL1A2	2
CTSA	2
CYCS	2
DCN	2
DLG5	2
DMD	2
DPYSL2	2
EIF3A	2
ENPP1	2
EPHA3	2
FST	2
GADD45A	2
GATM	2
GLP2R	2
GSN	2
HNRNPA2B1	2
HSP90B1	2
IDE	2
JUNB	2
KCNB1	2
KCNC2	2
KCNK5	2
KCNK6	2
KRT8	2
MDM2	2
MDM4	2
MLH1	2
MLLT3	2
MMAA	2
NCOA1	2
NEUROD1	2
NISCH	2
NKX6-1	2
NTSR1	2
P2RY2	2
PAK4	2
PDCD6	2
PEBP1	2
PIK3C2A	2
PIM3	2
PIN1	2
PLIN3	2
PMP22	2
PNP	2
PRKCI	2
PRLR	2
PSME4	2
RALBP1	2
ROCK1	2
SCD	2
SCN1B	2
SERPINA1	2
SERPINB2	2
SFPQ	2
SLC22A3	2
SLC4A1	2
SLC6A5	2
SMARCA4	2
STK39	2
STX4	2
TLE3	2
TNFAIP3	2
TSC22D3	2
TSPYL1	2
WEE1	2
XBP1	2
ABHD12	1
ACACA	1
ADAMTS1	1
ADO	1
AGXT2	1
AKAP13	1
ARF1	1
ARHGAP12	1
ATP2B1	1
ATP6V1A	1
B4GALNT1	1
BACH1	1
BCL2L11	1
CALU	1
CAMK2A	1
CAMLG	1
CANX	1
CAPN1	1
CBLC	1
CBX5	1
CCNA2	1
CCS	1
CDC5L	1
CDK16	1
CDK9	1
CEP68	1
CHD1	1
CHD4	1
CISH	1
CIT	1
CLK1	1
CORO7	1
CRISPLD2	1
CRMP1	1
CROT	1
CSNK1A1	1
CSNK1D	1
CSNK1E	1
CTPS1	1
CTSD	1
DCLK1	1
DDRGK1	1
DDX5	1
DUSP6	1
EEF2K	1
EIF2AK1	1
EIF2AK2	1
EIF4A1	1
EIF4EBP1	1
EIF4G1	1
EMP1	1
ESYT2	1
FDFT1	1
FDX1	1
FHL2	1
FLCN	1
FLNA	1
FOSL1	1
FUS	1
FUT2	1
GATA4	1
GJC1	1
GLUL	1
GPRC5A	1
GSTM3	1
HCN2	1
HDC	1
HERC2	1
HEXA	1
HINT1	1
HIPK3	1
HM13	1
HNRNPK	1
HNRNPL	1
ICMT	1
IDO1	1
IDS	1
IFNGR2	1
IL4R	1
IL7R	1
IQGAP1	1
IRAK3	1
ISYNA1	1
ITGA5	1
ITGB1	1
JAG1	1
JUND	1
KHSRP	1
KMT2D	1
KMT2E	1
LAMB1	1
LAMC2	1
LAMC3	1
LRP1	1
MAFK	1
MAP3K3	1
MARK4	1
MAT1A	1
MAT2A	1
MDH1	1
ME3	1
MKI67	1
MYLIP	1
MYLK	1
MYLK3	1
NCOR2	1
NDUFA5	1
NDUFA7	1
NDUFB11	1
NDUFS2	1
NDUFS8	1
NEK3	1
NEK4	1
NEK9	1
NFIB	1
NFKBIA	1
NGFR	1
NPEPPS	1
NPY4R	1
NUCB2	1
OASL	1
OGDH	1
PAK1	1
PAK3	1
PAPOLA	1
PDCD4	1
PDK4	1
PDPK1	1
PDYN	1
PFN1	1
PHB2	1
PHEX	1
PI4K2A	1
PLCE1	1
PLK2	1
POLR2A	1
POLR3G	1
POMC	1
PPP1CA	1
PRKDC	1
PRPF4B	1
PTAFR	1
PTGES	1
PTGIS	1
PTGR2	1
PURA	1
QPRT	1
RABGAP1L	1
RIOK3	1
RPL14	1
RPL23A	1
RRP1B	1
RRP7A	1
S1PR2	1
SBK1	1
SCO1	1
SDF4	1
SEMA3C	1
SF1	1
SF3A2	1
SFN	1
SLC12A5	1
SLC1A5	1
SLC29A3	1
SLC2A3	1
SLC36A2	1
SLC52A2	1
SLC5A6	1
SLC7A5	1
SLC9A1	1
SLC9A3	1
SORCS2	1
SP1	1
SPTBN1	1
SRPRB	1
SRSF1	1
SRSF4	1
STIP1	1
STK17B	1
STK38	1
STK4	1
STXBP2	1
SV2C	1
TAB1	1
TAOK2	1
TEAD1	1
TGFBR1	1
TGFBR3	1
TMEM167A	1
TNRC6A	1
TRPC3	1
TSHZ2	1
UBE2D1	1
UGDH	1
ULK1	1
VASP	1
VIM	1
VPS37A	1
WNK1	1
YWHAB	1
YWHAE	1

## Sheet: Drugs-number of targets
Drug	Number
FOSTAMATINIB	66
CISPLATIN	37
COPPER	28
PACLITAXEL	26
DASATINIB	24
ERLOTINIB	23
ARTENIMOL	22
SORAFENIB	22
FLUOROURACIL	21
GEMCITABINE	21
ALCOHOL	18
CARBOPLATIN	18
GEFITINIB	18
DOCETAXEL	17
IMATINIB	17
METHOTREXATE	15
DEXAMETHASONE	14
EVEROLIMUS	14
METHYLDOPA	14
PALBOCICLIB	14
PROGESTERONE	14
TAMOXIFEN	14
VANDETANIB	14
BEVACIZUMAB	13
HALOPERIDOL	13
IRINOTECAN	13
OLAPARIB	13
SIROLIMUS	13
TRAMETINIB	13
BORTEZOMIB	12
DOXORUBICIN	12
VINCRISTINE	12
CETUXIMAB	11
CLOZAPINE	11
COLCHICINE	10
CRIZOTINIB	10
DAUNORUBICIN	10
DAUNORUBICIN HYDROCHLORIDE	10
DOXORUBICIN HYDROCHLORIDE	10
HEXACHLOROPHENE	10
METFORMIN	10
NIFEDIPINE	10
PAZOPANIB	10
SIMVASTATIN	10
THIMEROSAL	10
TRETINOIN	10
VORINOSTAT	10
ATORVASTATIN	9
ETOPOSIDE	9
HYDROCHLOROTHIAZIDE	9
INSULIN	9
OLANZAPINE	9
PEMBROLIZUMAB	9
RUCAPARIB	9
ASPIRIN	8
BOSUTINIB	8
CAPECITABINE	8
CYCLOPHOSPHAMIDE	8
DIAZEPAM	8
DIPYRIDAMOLE	8
HYDROCORTISONE	8
INDOMETHACIN	8
LAPATINIB	8
MERCAPTOPURINE	8
METHYLPHENIDATE	8
MITOXANTRONE HYDROCHLORIDE	8
NINTEDANIB	8
PIMOZIDE	8
PONATINIB	8
REGORAFENIB	8
RIBAVIRIN	8
RISPERIDONE	8
TRIFLUOPERAZINE	8
VEMURAFENIB	8
VERAPAMIL	8
ALPELISIB	7
AZACITIDINE	7
CARFILZOMIB	7
CLOTRIMAZOLE	7
CYCLOSPORINE	7
EPIRUBICIN	7
HALOTHANE	7
LOVASTATIN	7
MIDAZOLAM	7
MIDOSTAURIN	7
NIVOLUMAB	7
OCRIPLASMIN	7
OXALIPLATIN	7
RALOXIFENE HYDROCHLORIDE	7
TEMOZOLOMIDE	7
TRASTUZUMAB	7
VINBLASTINE	7
ALPRAZOLAM	6
CAFFEINE	6
CARBAMAZEPINE	6
CHLORPROMAZINE	6
CLADRIBINE	6
DABRAFENIB	6
DEFEROXAMINE	6
DIGITOXIN	6
FENOFIBRATE	6
FLUTAMIDE	6
GLUTAMINE	6
GLYCINE	6
INAMRINONE	6
LEUCOVORIN	6
MELPHALAN	6
METFORMIN HYDROCHLORIDE	6
MITOXANTRONE	6
NICLOSAMIDE	6
PHENYTOIN	6
PRIMIDONE	6
PYRIMETHAMINE	6
SUNITINIB	6
TALAZOPARIB	6
TEMSIROLIMUS	6
THROMBIN	6
TOPOTECAN HYDROCHLORIDE	6
TRIAMCINOLONE	6
VINBLASTINE SULFATE	6
ACETAMINOPHEN	5
BICALUTAMIDE	5
BRIGATINIB	5
CHLORDIAZEPOXIDE	5
CHLORPROMAZINE HYDROCHLORIDE	5
CLOBAZAM	5
COPANLISIB	5
CYTARABINE	5
DECITABINE	5
DIGOXIN	5
ECONAZOLE NITRATE	5
EPOETIN ALFA	5
ESTAZOLAM	5
ESTRADIOL	5
FLUOXETINE	5
FLUSPIRILENE	5
IBRUTINIB	5
IDARUBICIN	5
IDARUBICIN HYDROCHLORIDE	5
ISOFLURANE	5
ISOPROTERENOL	5
IXAZOMIB CITRATE	5
LORATADINE	5
MELATONIN	5
MORPHINE	5
NITRAZEPAM	5
OXAZEPAM	5
PANITUMUMAB	5
PERPHENAZINE	5
PODOFILOX	5
PRASTERONE	5
PRAVASTATIN	5
PRAZEPAM	5
PROPOFOL	5
RILUZOLE	5
SERTRALINE	5
SERTRALINE HYDROCHLORIDE	5
STREPTOZOCIN	5
TACROLIMUS	5
TAMOXIFEN CITRATE	5
TENECTEPLASE	5
THEOPHYLLINE	5
THIOGUANINE	5
TOPIRAMATE	5
TRIAMTERENE	5
VENETOCLAX	5
VINORELBINE	5
VINORELBINE TARTRATE	5
WARFARIN	5
ABEMACICLIB	4
ACALABRUTINIB	4
ACAMPROSATE CALCIUM	4
ACETYLCYSTEINE	4
ACITRETIN	4
ACRIFLAVINE	4
ADEMETIONINE	4
AMIFOSTINE	4
AMOXAPINE	4
ATENOLOL	4
ATEZOLIZUMAB	4
AZATHIOPRINE	4
BENZBROMARONE	4
BINIMETINIB	4
BIOTIN	4
BROMAZEPAM	4
CABAZITAXEL	4
CABOZANTINIB	4
CEFTRIAXONE	4
CHLORAMBUCIL	4
CHLORHEXIDINE HYDROCHLORIDE	4
CITALOPRAM	4
CLOFIBRATE	4
CLONAZEPAM	4
CLORAZEPIC ACID	4
CLOTIAZEPAM	4
DACOMITINIB	4
DACTINOMYCIN	4
DESFLURANE	4
DISULFIRAM	4
DRONEDARONE	4
ENALAPRIL	4
ENCORAFENIB	4
ENFLURANE	4
EPINEPHRINE	4
ERYTHROMYCIN	4
FLECAINIDE	4
FLUPHENAZINE	4
FLURAZEPAM	4
GENTIAN VIOLET	4
GLYCERIN	4
HALAZEPAM	4
ISAVUCONAZOLE	4
IXABEPILONE	4
LIDOCAINE	4
LIOTHYRONINE SODIUM	4
LOPERAMIDE	4
LORAZEPAM	4
MECHLORETHAMINE HYDROCHLORIDE	4
MENADIONE	4
MEPROBAMATE	4
METHIMAZOLE	4
METHYLPREDNISOLONE	4
MIDAZOLAM HYDROCHLORIDE	4
NICOTINE	4
NIRAPARIB	4
NITROGLYCERIN	4
NORTRIPTYLINE HYDROCHLORIDE	4
OMEPRAZOLE	4
ORPHENADRINE HYDROCHLORIDE	4
OUABAIN	4
PAROXETINE	4
PAROXETINE HYDROCHLORIDE	4
PEMETREXED	4
PIOGLITAZONE	4
PROCHLORPERAZINE EDISYLATE	4
QUAZEPAM	4
QUINIDINE	4
REPAGLINIDE	4
ROMIDEPSIN	4
RUXOLITINIB	4
SEVOFLURANE	4
SODIUM CHLORIDE	4
SORAFENIB TOSYLATE	4
SULFASALAZINE	4
TANNIC ACID	4
TEMAZEPAM	4
TESTOSTERONE	4
THALIDOMIDE	4
THONZONIUM BROMIDE	4
TOPOTECAN	4
TRASTUZUMAB EMTANSINE	4
TRIFLUPROMAZINE HYDROCHLORIDE	4
VINCRISTINE SULFATE	4
ZAFIRLUKAST	4
ABIRATERONE	3
ADAPALENE	3
AFATINIB	3
ALBUMIN HUMAN	3
AMCINONIDE	3
AMITRIPTYLINE HYDROCHLORIDE	3
AMLEXANOX	3
ANISINDIONE	3
ARIPIPRAZOLE	3
ASPARAGINASE	3
AXITINIB	3
BENOXINATE HYDROCHLORIDE	3
BEPRIDIL	3
BEPRIDIL HYDROCHLORIDE	3
BIFONAZOLE	3
BRENTUXIMAB VEDOTIN	3
BUTABARBITAL SODIUM	3
BUTALBITAL	3
CALCITRIOL	3
CALCIUM	3
CARVEDILOL	3
CEFACLOR	3
CETRIMIDE	3
CHLORDIAZEPOXIDE HYDROCHLORIDE	3
CHLOROXINE	3
CICLOPIROX OLAMINE	3
CINNARIZINE	3
CIPROFLOXACIN	3
CLOMIPRAMINE HYDROCHLORIDE	3
CLORAZEPATE DIPOTASSIUM	3
COLLAGENASE CLOSTRIDIUM HISTOLYTICUM	3
CYANOCOBALAMIN	3
DALFAMPRIDINE	3
DENILEUKIN DIFTITOX	3
DESLANOSIDE	3
DIDANOSINE	3
DIMETHYL SULFOXIDE	3
DIPHENHYDRAMINE HYDROCHLORIDE	3
DISOPYRAMIDE PHOSPHATE	3
DOMIPHEN BROMIDE	3
DYCLONINE HYDROCHLORIDE	3
DYPHYLLINE	3
ERDAFITINIB	3
ERIBULIN MESYLATE	3
ERLOSAMIDE	3
ESTRONE	3
ESZOPICLONE	3
ETHCHLORVYNOL	3
ETHOPROPAZINE HYDROCHLORIDE	3
ETOMIDATE	3
EXEMESTANE	3
FINASTERIDE	3
FLUMAZENIL	3
FLUNISOLIDE	3
FLUOXETINE HYDROCHLORIDE	3
FLUVASTATIN	3
FULVESTRANT	3
GABAPENTIN	3
GABAPENTIN ENACARBIL	3
GENTAMICIN	3
GLIPIZIDE	3
GLUTETHIMIDE	3
GLYBURIDE	3
GUANIDINE HYDROCHLORIDE	3
IBUTILIDE	3
IMATINIB MESYLATE	3
IRBESARTAN	3
KETOCONAZOLE	3
LAMIVUDINE	3
LANSOPRAZOLE	3
LENALIDOMIDE	3
LENVATINIB	3
LEVODOPA	3
LINDANE	3
MAPROTILINE HYDROCHLORIDE	3
METHARBITAL	3
METHOHEXITAL SODIUM	3
METHYLENE BLUE	3
METHYPRYLON	3
MIFEPRISTONE	3
MINOCYCLINE	3
MIRTAZAPINE	3
MITOMYCIN	3
MITOTANE	3
MORICIZINE HYDROCHLORIDE	3
MOXIFLOXACIN	3
NALOXONE	3
NERATINIB	3
NEVIRAPINE	3
NILOTINIB	3
NINTEDANIB ESYLATE	3
ORPHENADRINE CITRATE	3
OSIMERTINIB MESYLATE	3
OXYTETRACYCLINE	3
OXYTOCIN	3
PENTOXIFYLLINE	3
PIRFENIDONE	3
PRAZOSIN	3
PREDNISOLONE	3
PREGABALIN	3
PRILOCAINE	3
PROCHLORPERAZINE	3
PROMETHAZINE	3
PROPAFENONE HYDROCHLORIDE	3
QUETIAPINE	3
RABEPRAZOLE SODIUM	3
RETINOL	3
RIBOCICLIB	3
SAFINAMIDE	3
SALMETEROL XINAFOATE	3
SINCALIDE	3
TALBUTAL	3
TAURINE	3
TERAZOSIN	3
TETRACAINE	3
THIAMYLAL SODIUM	3
THIOPENTAL SODIUM	3
TRICLOCARBAN	3
TRICLOFOS SODIUM	3
TRIFLURIDINE	3
TRYPAN BLUE	3
USTEKINUMAB	3
VASOPRESSIN	3
VINFLUNINE	3
XANTHINOL	3
ZONISAMIDE	3
ACENOCOUMAROL	2
ACETYLDIGITOXIN	2
ACYCLOVIR	2
AFATINIB DIMALEATE	2
AFLIBERCEPT	2
ALDESLEUKIN	2
ALTEPLASE	2
AMINOPHYLLINE	2
AMIODARONE HYDROCHLORIDE	2
AMITRIPTYLINE	2
AMSACRINE	2
ANASTROZOLE	2
APOMORPHINE	2
ARTICAINE HYDROCHLORIDE	2
ATALUREN	2
ATOSIBAN	2
AZELASTINE HYDROCHLORIDE	2
BACITRACIN	2
BASILIXIMAB	2
BENAZEPRIL	2
BENZALKONIUM CHLORIDE	2
BETAMETHASONE	2
BEXAROTENE	2
BLEOMYCIN	2
BLINATUMOMAB	2
BROMOCRIPTINE	2
BUMETANIDE	2
BUSULFAN	2
CANAGLIFLOZIN	2
CANDESARTAN CILEXETIL	2
CANTHARIDIN	2
CARBETOCIN	2
CEFIXIME	2
CERITINIB	2
CERULETIDE	2
CHENODIOL	2
CHLOROPROCAINE	2
CHLOROPROCAINE HYDROCHLORIDE	2
CHLORPROPAMIDE	2
CHLORQUINALDOL	2
CHOLECALCIFEROL	2
CITALOPRAM HYDROBROMIDE	2
CLARITHROMYCIN	2
CLOMIPRAMINE	2
COBIMETINIB	2
COCAINE	2
CRISABOROLE	2
DACARBAZINE	2
DACLIZUMAB	2
DAPSONE	2
DEFERASIROX	2
DESMOPRESSIN	2
DESOXIMETASONE	2
DEXIBUPROFEN	2
DEXRAZOXANE	2
DIACETYLMORPHINE	2
DICLOFENAC	2
DICLOFENAC SODIUM	2
DOFETILIDE	2
DOPAMINE	2
DOXEPIN	2
DOXYCYCLINE	2
DRONEDARONE HYDROCHLORIDE	2
DULOXETINE HYDROCHLORIDE	2
EFAVIRENZ	2
ENZALUTAMIDE	2
EPINEPHRINE BITARTRATE	2
EPIRUBICIN HYDROCHLORIDE	2
ESCITALOPRAM	2
ESKETAMINE	2
ESLICARBAZEPINE	2
ESLICARBAZEPINE ACETATE	2
ESTRADIOL VALERATE	2
ETHACRYNIC ACID	2
ETHINYL ESTRADIOL	2
ETHOTOIN	2
ETIDOCAINE HYDROCHLORIDE	2
ETOPOSIDE PHOSPHATE	2
EZETIMIBE	2
FENTANYL	2
FINGOLIMOD HYDROCHLORIDE	2
FISH OIL TRIGLYCERIDES	2
FLAVOXATE HYDROCHLORIDE	2
FLOXURIDINE	2
FLUFENAMIC ACID	2
FLUOCINONIDE	2
FLUOROMETHOLONE	2
FLUOXYMESTERONE	2
FLURANDRENOLIDE	2
FLUVOXAMINE	2
FORMESTANE	2
FOSPHENYTOIN SODIUM	2
GLICLAZIDE	2
GLIMEPIRIDE	2
HEXYLCAINE HYDROCHLORIDE	2
HEXYLRESORCINOL	2
HISTAMINE	2
HYDRALAZINE	2
HYDROQUINONE	2
HYDROXOCOBALAMIN	2
HYDROXYCHLOROQUINE	2
HYDROXYUREA	2
IBUPROFEN	2
ICATIBANT	2
IDEBENONE	2
IDURSULFASE	2
IFOSFAMIDE	2
ILOPROST	2
IMIPRAMINE HYDROCHLORIDE	2
INDECAINIDE HYDROCHLORIDE	2
IRINOTECAN HYDROCHLORIDE	2
ISOCONAZOLE	2
ISONIAZID	2
ISOSORBIDE MONONITRATE	2
ISOTRETINOIN	2
KETAZOLAM	2
LAMOTRIGINE	2
LANATOSIDE C	2
LAPATINIB DITOSYLATE	2
LEVETIRACETAM	2
LEVONORDEFRIN	2
LIDOCAINE HYDROCHLORIDE	2
LIDOFLAZINE	2
LOMUSTINE	2
LOPERAMIDE HYDROCHLORIDE	2
MEDRYSONE	2
MENADIOL SODIUM DIPHOSPHATE	2
MEPHENYTOIN	2
MEPIVACAINE	2
MEPIVACAINE HYDROCHLORIDE	2
MERETHOXYLLINE PROCAINE	2
METERGOLINE	2
METHACYCLINE HYDROCHLORIDE	2
METHADONE	2
METHIONINE	2
METOCLOPRAMIDE	2
MEXILETINE HYDROCHLORIDE	2
MIANSERIN	2
MICONAZOLE	2
MICONAZOLE NITRATE	2
MILRINONE	2
MOMETASONE FUROATE	2
MYCOPHENOLATE MOFETIL	2
MYCOPHENOLIC ACID	2
NEFAZODONE	2
NEFAZODONE HYDROCHLORIDE	2
NETARSUDIL	2
NICARDIPINE	2
NICARDIPINE HYDROCHLORIDE	2
NICORANDIL	2
NIMESULIDE	2
NITAZOXANIDE	2
NITROFURANTOIN	2
NITROPRUSSIDE	2
NORFLOXACIN	2
NORGESTIMATE	2
NORGESTREL	2
NORTRIPTYLINE	2
OFLOXACIN	2
OMACETAXINE MEPESUCCINATE	2
ORLISTAT	2
OSIMERTINIB	2
OXATOMIDE	2
OXCARBAZEPINE	2
OXTRIPHYLLINE	2
OXYBATE	2
OXYBENZONE	2
PALIFERMIN	2
PAPAVERINE HYDROCHLORIDE	2
PAZOPANIB HYDROCHLORIDE	2
PERTUZUMAB	2
PEXIDARTINIB	2
PHENACEMIDE	2
PHENAZOPYRIDINE	2
PHENAZOPYRIDINE HYDROCHLORIDE	2
PHENOXYBENZAMINE HYDROCHLORIDE	2
PHENTOLAMINE	2
PHENYLEPHRINE	2
PHENYTOIN SODIUM	2
PIRETANIDE	2
PITOLISANT	2
PRILOCAINE HYDROCHLORIDE	2
PRIMAQUINE	2
PROBENECID	2
PROCAINAMIDE HYDROCHLORIDE	2
PROCAINE HYDROCHLORIDE	2
PROCARBAZINE	2
PROFLAVINE	2
PROMAZINE HYDROCHLORIDE	2
PROMETHAZINE HYDROCHLORIDE	2
PROPAFENONE	2
PROPARACAINE HYDROCHLORIDE	2
PROPOXYCAINE HYDROCHLORIDE	2
PROPRANOLOL	2
PROPYLTHIOURACIL	2
PROTRIPTYLINE HYDROCHLORIDE	2
PYROGALLOL	2
QUINIDINE GLUCONATE	2
QUINIDINE POLYGALACTURONATE	2
QUINIDINE SULFATE	2
RALOXIFENE	2
RALTITREXED	2
RAMUCIRUMAB	2
RASBURICASE	2
RITUXIMAB	2
ROPIVACAINE	2
ROPIVACAINE HYDROCHLORIDE	2
RUCAPARIB CAMSYLATE	2
RUFINAMIDE	2
SAQUINAVIR MESYLATE	2
SOTALOL	2
SOYBEAN OIL	2
SULFISOXAZOLE	2
SULINDAC	2
TALAZOPARIB TOSYLATE	2
TEGAFUR	2
TELITHROMYCIN	2
TESTOSTERONE PROPIONATE	2
TETRACAINE HYDROCHLORIDE	2
THEOPHYLLINE SODIUM GLYCINATE	2
THYROTROPIN	2
TICAGRELOR	2
TIVOZANIB	2
TIZANIDINE	2
TOCAINIDE HYDROCHLORIDE	2
TOFACITINIB	2
TOLAZAMIDE	2
TOLBUTAMIDE	2
TOLVAPTAN	2
TRAZODONE HYDROCHLORIDE	2
TRIMETREXATE	2
TROMETHAMINE	2
TROPISETRON	2
UREA	2
VALRUBICIN	2
VERNAKALANT	2
ZALCITABINE	2
ABACAVIR	1
ACAMPROSATE	1
ACARBOSE	1
ACETOHEXAMIDE	1
ACETOPHENAZINE	1
ADENOSINE	1
ALBENDAZOLE	1
ALBUTEROL	1
ALCLOMETASONE DIPROPIONATE	1
ALECTINIB	1
ALFACALCIDOL	1
ALFUZOSIN	1
ALITRETINOIN	1
ALLOPURINOL	1
ALOSETRON HYDROCHLORIDE	1
ALPROSTADIL	1
AMANTADINE	1
AMANTADINE HYDROCHLORIDE	1
AMDINOCILLIN	1
AMILORIDE	1
AMIODARONE	1
AMISULPRIDE	1
AMLODIPINE	1
AMLODIPINE BESYLATE	1
AMODIAQUINE	1
AMOROLFINE	1
AMPICILLIN	1
AMYLMETACRESOL	1
ANAGRELIDE	1
ANAGRELIDE HYDROCHLORIDE	1
ANAKINRA	1
APALUTAMIDE	1
APREMILAST	1
ARGATROBAN	1
ARTEMISININ	1
ARTESUNATE	1
ARTICAINE	1
ATAZANAVIR	1
ATOMOXETINE HYDROCHLORIDE	1
ATRACURIUM BESYLATE	1
ATROPINE	1
AVATROMBOPAG	1
BACLOFEN	1
BARICITINIB	1
BECAPLERMIN	1
BECLOMETHASONE DIPROPIONATE	1
BELINOSTAT	1
BENAZEPRIL HYDROCHLORIDE	1
BENORILATE	1
BENZTHIAZIDE	1
BENZTROPINE MESYLATE	1
BENZYLPENICILLIN	1
BETAMETHASONE DIPROPIONATE	1
BETAMETHASONE SODIUM PHOSPHATE	1
BETAMETHASONE VALERATE	1
BISACODYL	1
BIVALIRUDIN	1
BOCEPREVIR	1
BRIVARACETAM	1
BROMOCRIPTINE MESYLATE	1
BUDESONIDE	1
BUPIVACAINE	1
BUPRENORPHINE HYDROCHLORIDE	1
BUPROPION	1
BUPROPION HYDROCHLORIDE	1
BUSPIRONE HYDROCHLORIDE	1
CALCIFEDIOL	1
CALCIPOTRIENE	1
CALCITONIN	1
CANNABIDIOL	1
CANRENOATE POTASSIUM	1
CAPSAICIN	1
CARBACHOL	1
CARBARIL	1
CARBENOXOLONE	1
CARBIDOPA	1
CARMUSTINE	1
CATUMAXOMAB	1
CEFADROXIL	1
CEFAMANDOLE	1
CEFDINIR	1
CEFMETAZOLE	1
CEFONICID SODIUM	1
CEFOPERAZONE	1
CEFOTAXIME	1
CEFOTETAN	1
CEFOTIAM HYDROCHLORIDE	1
CEFOXITIN	1
CEFOXITIN SODIUM	1
CEFPODOXIME PROXETIL	1
CEFUROXIME	1
CEMIPLIMAB	1
CENEGERMIN	1
CEPHALEXIN	1
CEPHALOTHIN SODIUM	1
CEPHAPIRIN SODIUM	1
CEPHRADINE	1
CERULETIDE DIETHYLAMINE	1
CETIRIZINE	1
CETIRIZINE HYDROCHLORIDE	1
CETYLPYRIDINIUM CHLORIDE	1
CHLORAMPHENICOL PALMITATE	1
CHLOROBUTANOL	1
CHLOROGUANIDE	1
CHLOROQUINE	1
CHLOROTRIANISENE	1
CHLORPHENIRAMINE MALEATE	1
CHLORTETRACYCLINE HYDROCHLORIDE	1
CHOLESTYRAMINE	1
CICLESONIDE	1
CILOSTAZOL	1
CIMETIDINE	1
CIPROFIBRATE	1
CLEMASTINE	1
CLEVIDIPINE	1
CLOBETASOL PROPIONATE	1
CLOCORTOLONE PIVALATE	1
CLOFARABINE	1
CLOPIDOGREL	1
CODEINE	1
CONIVAPTAN	1
CONIVAPTAN HYDROCHLORIDE	1
CORTICOTROPIN	1
CROMOLYN SODIUM	1
CUPRIC CHLORIDE	1
CYCLANDELATE	1
CYCLOBENZAPRINE HYDROCHLORIDE	1
CYCLOGUANIL	1
CYCLOSERINE	1
CYPROHEPTADINE HYDROCHLORIDE	1
CYPROTERONE ACETATE	1
CYSTEINE	1
CYSTINE	1
DABIGATRAN ETEXILATE MESYLATE	1
DANAZOL	1
DANTROLENE	1
DANTROLENE SODIUM	1
DAPAGLIFLOZIN	1
DAPAGLIFLOZIN PROPYLENE GLYCOL	1
DARATUMUMAB	1
DAROLUTAMIDE	1
DAUNORUBICIN CITRATE	1
DEFERIPRONE	1
DEFLAZACORT	1
DELAVIRDINE	1
DEMECLOCYCLINE HYDROCHLORIDE	1
DEQUALINIUM	1
DEQUALINIUM CHLORIDE	1
DESERPIDINE	1
DESIPRAMINE HYDROCHLORIDE	1
DESIRUDIN	1
DESMOPRESSIN ACETATE	1
DESOGESTREL	1
DESONIDE	1
DESOXYCORTICOSTERONE ACETATE	1
DESOXYCORTICOSTERONE PIVALATE	1
DESVENLAFAXINE	1
DESVENLAFAXINE SUCCINATE	1
DEXBROMPHENIRAMINE MALEATE	1
DEXTROMETHORPHAN	1
DIACEREIN	1
DIAZOXIDE	1
DIBUCAINE	1
DICUMAROL	1
DIENESTROL	1
DIENOGEST	1
DIETHYLCARBAMAZINE CITRATE	1
DIFLORASONE DIACETATE	1
DIFLUPREDNATE	1
DILTIAZEM	1
DIMERCAPROL	1
DINOPROSTONE	1
DINUTUXIMAB	1
DIPHENOXYLATE HYDROCHLORIDE	1
DISOPYRAMIDE	1
DOBUTAMINE	1
DOBUTAMINE HYDROCHLORIDE	1
DOCUSATE	1
DOCUSATE SODIUM	1
DOMPERIDONE	1
DOXAZOSIN	1
DOXAZOSIN MESYLATE	1
DROMOSTANOLONE PROPIONATE	1
DRONABINOL	1
DROPERIDOL	1
DROSPIRENONE	1
DULOXETINE	1
DUPILUMAB	1
DURVALUMAB	1
DUTASTERIDE	1
DUVELISIB	1
DYDROGESTERONE	1
ECULIZUMAB	1
EFLORNITHINE	1
EFLORNITHINE HYDROCHLORIDE	1
ELIGLUSTAT	1
ELIGLUSTAT TARTRATE	1
EMAPALUMAB	1
EMPAGLIFLOZIN	1
EMTRICITABINE	1
ENOXACIN	1
ENOXIMONE	1
EPOETIN BETA	1
EPOPROSTENOL	1
ERGOCALCIFEROL	1
ERGONOVINE	1
ERIBULIN	1
ERLOTINIB HYDROCHLORIDE	1
ERTUGLIFLOZIN	1
ESCITALOPRAM OXALATE	1
ESKETAMINE HYDROCHLORIDE	1
ESTRADIOL BENZOATE	1
ESTRADIOL CYPIONATE	1
ESTRAMUSTINE PHOSPHATE	1
ESTRAMUSTINE PHOSPHATE SODIUM	1
ESTRIOL	1
ETANERCEPT	1
ETEPLIRSEN	1
ETHAMSYLATE	1
ETHOSUXIMIDE	1
ETHYLESTRENOL	1
ETHYNODIOL DIACETATE	1
ETIDRONIC ACID	1
ETONOGESTREL	1
ETRAVIRINE	1
EVANS BLUE	1
FAMOTIDINE	1
FEBUXOSTAT	1
FELBAMATE	1
FELODIPINE	1
FENOLDOPAM MESYLATE	1
FEXOFENADINE HYDROCHLORIDE	1
FILGRASTIM	1
FINAFLOXACIN	1
FINGOLIMOD	1
FLECAINIDE ACETATE	1
FLUCONAZOLE	1
FLUCYTOSINE	1
FLUNARIZINE	1
FLUNARIZINE HYDROCHLORIDE	1
FLUOCINOLONE ACETONIDE	1
FLUORESCEIN	1
FLUPHENAZINE HYDROCHLORIDE	1
FLUPREDNISOLONE	1
FLURBIPROFEN	1
FLUVOXAMINE MALEATE	1
FOLIC ACID	1
FOSPROPOFOL	1
FURAZOLIDONE	1
FUROSEMIDE	1
GALANTAMINE HYDROBROMIDE	1
GALSULFASE	1
GANCICLOVIR	1
GEMCITABINE HYDROCHLORIDE	1
GEMFIBROZIL	1
GESTRINONE	1
GILTERITINIB	1
GLIQUIDONE	1
GLUCAGON	1
GRANISETRON	1
GRISEOFULVIN	1
GUANABENZ ACETATE	1
GUANIDINE	1
HALCINONIDE	1
HALOBETASOL PROPIONATE	1
HALOFANTRINE	1
HALOFANTRINE HYDROCHLORIDE	1
HALOPROGIN	1
HOMATROPINE HYDROBROMIDE	1
HYALURONIDASE	1
HYDRALAZINE HYDROCHLORIDE	1
HYDROCORTISONE BUTYRATE	1
HYDROCORTISONE PROBUTATE	1
HYDROCORTISONE SODIUM PHOSPHATE	1
HYDROCORTISONE SODIUM SUCCINATE	1
HYDROCORTISONE VALERATE	1
HYDROXYZINE	1
HYDROXYZINE PAMOATE	1
ICATIBANT ACETATE	1
IDELALISIB	1
IDOXURIDINE	1
IFENPRODIL	1
IMIDAPRIL	1
IMIPRAMINE	1
INAMRINONE LACTATE	1
INDINAVIR	1
INDINAVIR SULFATE	1
INDOCYANINE GREEN	1
INFLIXIMAB	1
INTERFERON ALFA-2A	1
INTERFERON ALFA-2B	1
INTERFERON ALFA-N3	1
INTERFERON ALFACON-1	1
INTERFERON BETA-1A	1
INTERFERON BETA-1B	1
INTERFERON GAMMA-1B	1
IOPAMIDOL	1
ISOETHARINE MESYLATE	1
ISOSORBIDE DINITRATE	1
IVABRADINE	1
IVERMECTIN	1
IVOSIDENIB	1
KETAMINE	1
KETAMINE HYDROCHLORIDE	1
KETANSERIN	1
KETOPROFEN	1
KETOROLAC TROMETHAMINE	1
LACTIC ACID	1
LAROTRECTINIB	1
LEFLUNOMIDE	1
LENVATINIB MESYLATE	1
LEPIRUDIN	1
LERCANIDIPINE HYDROCHLORIDE	1
LETROZOLE	1
LEVOCARNITINE	1
LEVOFLOXACIN	1
LEVOMEPROMAZINE MALEATE	1
LEVOMILNACIPRAN HYDROCHLORIDE	1
LEVONORGESTREL	1
LISINOPRIL	1
LOFEPRAMINE HYDROCHLORIDE	1
LOMEFLOXACIN	1
LOMITAPIDE	1
LOMITAPIDE MESYLATE	1
LORACARBEF	1
LORLATINIB	1
LOSARTAN	1
LOTEPREDNOL ETABONATE	1
LOXAPINE	1
LOXAPINE SUCCINATE	1
LULICONAZOLE	1
LUSUTROMBOPAG	1
LYPRESSIN	1
MAFENIDE	1
MAPROTILINE	1
MASOPROCOL	1
MAZINDOL	1
MEBENDAZOLE	1
MEBEVERINE HYDROCHLORIDE	1
MECASERMIN	1
MECASERMIN RINFABATE	1
MECOBALAMIN	1
MEDROXYPROGESTERONE ACETATE	1
MEFENAMIC ACID	1
MEFLOQUINE HYDROCHLORIDE	1
MEGESTROL ACETATE	1
MELOXICAM	1
MEMANTINE	1
MEMANTINE HYDROCHLORIDE	1
MEPERIDINE	1
MEPHOBARBITAL	1
MEPREDNISONE	1
MESALAMINE	1
MESTRANOL	1
METHIXENE HYDROCHLORIDE	1
METHYLPREDNISOLONE ACETATE	1
METHYLPREDNISOLONE SODIUM SUCCINATE	1
METHYLTESTOSTERONE	1
METILDIGOXIN	1
METOPROLOL	1
MEZLOCILLIN	1
MIANSERIN HYDROCHLORIDE	1
MIGLUSTAT	1
MILRINONE LACTATE	1
MINOCYCLINE HYDROCHLORIDE	1
MINOXIDIL	1
MIPOMERSEN	1
MITOBRONITOL	1
MOCLOBEMIDE	1
MOLSIDOMINE	1
MONTELUKAST	1
MOXETUMOMAB PASUDOTOX	1
MOXONIDINE	1
MUROMONAB-CD3	1
MYCOPHENOLATE MOFETIL HYDROCHLORIDE	1
NALIDIXIC ACID	1
NANDROLONE DECANOATE	1
NANDROLONE PHENPROPIONATE	1
NAPROXEN SODIUM	1
NATALIZUMAB	1
NATEGLINIDE	1
NECITUMUMAB	1
NEDOCROMIL	1
NELFINAVIR	1
NELFINAVIR MESYLATE	1
NEOMYCIN	1
NESIRITIDE	1
NETARSUDIL DIMESYLATE	1
NIACIN	1
NIACINAMIDE	1
NIFUROXAZIDE	1
NILOTINIB HYDROCHLORIDE MONOHYDRATE	1
NILUTAMIDE	1
NISOLDIPINE	1
NITRENDIPINE	1
NITRIC OXIDE	1
NORELGESTROMIN	1
NOREPINEPHRINE BITARTRATE	1
NORETHINDRONE	1
NORETHINDRONE ACETATE	1
NORETHYNODREL	1
NOSCAPINE	1
NYSTATIN	1
OCTOCRYLENE	1
OCTREOTIDE	1
OLSALAZINE	1
OPRELVEKIN	1
OXACILLIN	1
OXANDROLONE	1
OXIGLUTATIONE	1
OXITRIPTAN	1
OXYBUTYNIN CHLORIDE	1
OXYMETAZOLINE	1
OXYMETAZOLINE HYDROCHLORIDE	1
OXYMETHOLONE	1
PALIPERIDONE	1
PANCURONIUM BROMIDE	1
PANOBINOSTAT	1
PARAMETHASONE ACETATE	1
PAROXETINE MESYLATE	1
PEFLOXACIN	1
PEGINTERFERON ALFA-2A	1
PEGINTERFERON ALFA-2B	1
PEGINTERFERON BETA-1A	1
PEGLOTICASE	1
PENCICLOVIR	1
PENICILLAMINE	1
PENICILLIN G POTASSIUM	1
PENICILLIN V	1
PENTAGASTRIN	1
PENTAMIDINE ISETHIONATE	1
PENTETIC ACID	1
PENTOSAN POLYSULFATE SODIUM	1
PERICIAZINE	1
PERINDOPRIL	1
PERMETHRIN	1
PHENELZINE SULFATE	1
PHENIRAMINE	1
PHENOBARBITAL	1
PHENOLPHTHALEIN	1
PHENOXYBENZAMINE	1
PHENPROCOUMON	1
PHENTOLAMINE MESYLATE	1
PHENYLBUTANOIC ACID	1
PHTHALYLSULFATHIAZOLE	1
PHYTONADIONE	1
PIMECROLIMUS	1
PINACIDIL	1
PIPERAZINE	1
PIROXICAM	1
PITAVASTATIN CALCIUM	1
PLECANATIDE	1
PLERIXAFOR	1
PLICAMYCIN	1
POLIDOCANOL	1
PONATINIB HYDROCHLORIDE	1
PRALATREXATE	1
PRAMLINTIDE	1
PRAMOXINE	1
PRASUGREL	1
PREDNICARBATE	1
PREDNISOLONE ACETATE	1
PREDNISONE	1
PRIMAQUINE PHOSPHATE	1
PROBUCOL	1
PROCAINAMIDE	1
PROCAINE	1
PROMAZINE	1
PROPOXYCAINE	1
PSEUDOEPHEDRINE	1
PYRANTEL PAMOATE	1
PYRIDOSTIGMINE BROMIDE	1
PYRILAMINE	1
PYRILAMINE MALEATE	1
PYRITHIONE	1
PYRVINIUM PAMOATE	1
QUINAPRIL	1
QUINAPRIL HYDROCHLORIDE	1
QUINESTROL	1
QUININE	1
QUININE SULFATE	1
RAMIPRIL	1
RANIBIZUMAB	1
RANITIDINE	1
RANOLAZINE	1
RIBOFLAVIN	1
RIFABUTIN	1
RIFAMPIN	1
RIFAMYCIN SODIUM	1
RIFAPENTINE	1
RILONACEPT	1
RIOCIGUAT	1
RISANKIZUMAB	1
RITONAVIR	1
ROCURONIUM BROMIDE	1
ROFLUMILAST	1
ROMIPLOSTIM	1
ROPINIROLE HYDROCHLORIDE	1
ROSUVASTATIN	1
ROXITHROMYCIN	1
RUXOLITINIB PHOSPHATE	1
SALMETEROL	1
SAQUINAVIR	1
SERTACONAZOLE NITRATE	1
SIPONIMOD	1
SODIUM NITROPRUSSIDE	1
SODIUM OXYBATE	1
SOMATREM	1
SOMATROPIN	1
SONIDEGIB	1
SORBITOL	1
SOTALOL HYDROCHLORIDE	1
SPIRONOLACTONE	1
STANOZOLOL	1
STAVUDINE	1
SUCCIMER	1
SUCRALFATE	1
SULCONAZOLE NITRATE	1
SULFADIAZINE	1
SULFAMETHOXAZOLE	1
SULFANILAMIDE	1
SULPIRIDE	1
SUNITINIB MALATE	1
TACRINE	1
TADALAFIL	1
TAFENOQUINE	1
TAMSULOSIN HYDROCHLORIDE	1
TAZAROTENE	1
TAZOBACTAM SODIUM	1
TEDUGLUTIDE	1
TELAPREVIR	1
TELMISARTAN	1
TENIPOSIDE	1
TENOXICAM	1
TERLIPRESSIN	1
TESTOLACTONE	1
TESTOSTERONE CYPIONATE	1
TESTOSTERONE ENANTHATE	1
TESTOSTERONE UNDECANOATE	1
THIABENDAZOLE	1
THIAMYLAL	1
THIOCTIC ACID	1
THIOPENTAL	1
THIOTEPA	1
THIOTHIXENE	1
THONZONIUM	1
TIBOLONE	1
TICLOPIDINE	1
TILDRAKIZUMAB	1
TIOCONAZOLE	1
TIPIRACIL	1
TOFACITINIB CITRATE	1
TOLBUTAMIDE SODIUM, STERILE	1
TOLFENAMIC ACID	1
TOREMIFENE	1
TOREMIFENE CITRATE	1
TRIAMCINOLONE ACETONIDE	1
TRIAMCINOLONE DIACETATE	1
TRICLABENDAZOLE	1
TRICLOSAN	1
TRIFLUPROMAZINE	1
TRILOSTANE	1
TRIMETHOPRIM	1
ULIPRISTAL	1
UNOPROSTONE ISOPROPYL	1
UROKINASE	1
VASOPRESSIN TANNATE	1
VENLAFAXINE	1
VENLAFAXINE HYDROCHLORIDE	1
VERAPAMIL HYDROCHLORIDE	1
VERTEPORFIN	1
VIGABATRIN	1
VILAZODONE HYDROCHLORIDE	1
VINPOCETINE	1
VORTIOXETINE HYDROBROMIDE	1
WARFARIN POTASSIUM	1
YOHIMBINE HYDROCHLORIDE	1
ZALEPLON	1
ZICONOTIDE	1
ZICONOTIDE ACETATE	1
ZIDOVUDINE	1
ZIPRASIDONE	1
ZOLPIDEM	1
